# Supplementary material for: Genome-wide identification of brain miRNAs in response to high-intensity intermittent swimming training in Rattus norvegicus by deep sequencing
Source: BMC Mol Biol. 2019 Jan 15;20:3. doi: 10.1186/s12867-019-0120-4 (PMC6334412; doi:10.1186/s12867-019-0120-4)
Supplement: Supplementary file 2 — Additional file 2: Table S2. Known miRNAs identified in HIST and NC libraries. [file 12867_2019_120_MOESM2_ESM.xls]

## Sheet: Known_miRNAs
Additional file 2:
Table S2. Known miRNAs identified in HIST and NC libraries.
（1）Known miRNAs identified in HIST library:
No	miRNA name	Sequence	Length	Read count	miRNA family	miRNA Orthologs	Co-expression/Specific	Mark for Low expression
1	miR-9a-5p	TCTTTGGTTATCTAGCTGTATGA	23	1889962	mir-9	dme	HIST&NC
2	let-7c	TGAGGTAGTAGGTTGTATGGTT	22	2314478	let-7	hsa odi pma csa cin	HIST&NC
3	let-7f	TGAGGTAGTAGATTGTATAGTT	22	1754130	let-7	hsa	HIST&NC
4	miR-378	ACTGGACTTGGAGTCAGAAGGC	22	1544707	mir-378	hsa ppy cfa	HIST&NC
5	miR-182	TTTGGCAATGGTAGAACTCACACCG	25	1638730	mir-182	sko lgi cte mmu eca dre hsa spu	HIST&NC
6	miR-9	TCTTTGGTTATCTAGCTGTATG	22	1103879	mir-9	egr sko bma xtr	HIST&NC
7	let-7	TGAGGTAGTAGGTTGTATAGTT	22	804332	let-7	cel aga sja spu	HIST&NC
8	miR-30a	TGTAAACATCCTCGACTGGAAGC	23	607712	mir-30	hsa dre oan	HIST&NC
9	miR-30d	TGTAAACATCCCCGACTGGAAGC	23	594387	mir-30	hsa pma oan bta	HIST&NC
10	miR-127	TCGGATCCGTCTGAGCTTGGC	21	491449	mir-127	mmu oar	HIST&NC
11	miR-103a	AGCAGCATTGTACAGGGCTATGA	23	280569	mir-103	hsa pma	HIST&NC
12	let-7b	TGAGGTAGTAGGTTGTGTGGTT	22	638961	let-7	hsa odi pma xtr cin	HIST&NC
13	let-7-5p	TGAGGTAGTAGGTTGTATAGT	21	339133	let-7	tca dme	HIST&NC
14	miR-183	TATGGCACTGGTAGAATTCACT	22	623293	mir-183	lgi mmu gga sko csa	HIST&NC
15	miR-99b	CACCCGTAGAACCGACCTTGC	21	279118	mir-99	mmu	HIST&NC
16	let-7g	TGAGGTAGTAGTTTGTACAGTT	22	227155	let-7	mmu gga xtr dre	HIST&NC
17	miR-379	TGGTAGACTATGGAACGTAGG	21	272494	mir-379	hsa	HIST&NC
18	miR-30e	TGTAAACATCCTTGACTGGAAGC	23	175349	mir-30	gga mmu pma oan	HIST&NC
19	miR-24	TGGCTCAGTTCAGCAGGAACAGT	23	308093	mir-24	hsa cfa	HIST&NC
20	miR-181a	AACATTCAACGCTGTCGGTGA	21	230246	mir-181	mmu cfa bta	HIST&NC
21	miR-434-3p	TTTGAACCATCACTCGACTCCT	22	134159	mir-434	mmu	HIST&NC
22	miR-26a	TTCAAGTAATCCAGGATAGG	20	285016	mir-26	hsa gga	HIST&NC
23	miR-30e*	CTTTCAGTCGGATGTTTACAGC	22	108437	mir-30	mmu	HIST&NC
24	miR-124	TAAGGCACGCGGTGAATGC	19	99548	mir-124	cel aae mmu dre	HIST&NC
25	miR-744	TGCGGGGCTAGGGCTAACAGC	21	76857	mir-744	mmu	HIST&NC
26	miR-30a*	CTTTCAGTCGGATGTTTGCAGC	22	93753	mir-30	hsa pma	HIST&NC
27	miR-128	TCACAGTGAACCGGTCTCTTT	21	132801	mir-128	mmu dre pma	HIST&NC
28	let-7e	TGAGGTAGGAGGTTGTATAGTT	22	208672	let-7	hsa xtr cin bta	HIST&NC
29	miR-29a	TAGCACCATCTGAAATCGGTT	21	135687	mir-29	hsa gga cte pma bta ggo	HIST&NC
30	miR-100	AACCCGTAGATCCGAACTTGT	21	98251	mir-99	hsa nve bfl mdo	HIST&NC
31	miR-148a	TCAGTGCACTACAGAACTTTGT	22	59117	mir-148	hsa	HIST&NC
32	miR-101	GTACAGTACTGTGATAACTGA	21	154014	mir-101	hsa gga cfa cin	HIST&NC
33	miR-30a-5p	TGTAAACATCCTCGACTGGAAGCT	24	59025	mir-30	bta	HIST&NC
34	miR-138	AGCTGGTGTTGTGAATCAGGC	21	54954	mir-138	gga mmu dre	HIST&NC
35	miR-125b-5p	TCCCTGAGACCCTAACTTGTGA	22	61531	mir-125	mmu	HIST&NC
36	miR-129-5p	CTTTTTGCGGTCTGGGCTTGC	21	40604	mir-129	mmu	HIST&NC
37	miR-101a	TACAGTACTGTGATAGCTGAAG	22	129934	mir-101	dre	HIST&NC
38	miR-9a	TCTTTGGTTATCTAGCTGTATGAT	24	41073	mir-9	sme	HIST&NC
39	miR-411	ATAGTGGACCGTATAGCGTACG	22	93945	mir-379	ssc mmu cfa	HIST&NC
40	miR-7	TGGAAGACTAGTGATTTTGTTGTT	24	52229	mir-7	egr ssc cte gga ggo	HIST&NC
41	miR-21	TAGCTTATCAGACTGATGTTGA	22	71445	mir-21	hsa dre bta	HIST&NC
42	let-7d	AGAGGTAGTAGGTTGCATAGTT	22	65664	let-7	hsa odi gga dre pma cin mdo	HIST&NC
43	miR-219-2-3p	AGAATTGTGGCTGGACATCTGT	22	42596	mir-219	hsa	HIST&NC
44	miR-151-3p	CTAGACTGAGGCTCCTTGAGG	21	78077	mir-28	hsa mmu ssc	HIST&NC
45	miR-9*	ATAAAGCTAGATAACCGAAAGT	22	45994	mir-9	gga mmu dre bta	HIST&NC
46	miR-7-5p	TGGAAGACTAGTGATTTTGTTGT	23	30928	mir-7	tca dme	HIST&NC
47	miR-27b	TTCACAGTGGCTAAGTTCTGC	21	46616	mir-27	mmu dre	HIST&NC
48	miR-191	CAACGGAATCCCAAAAGCAGCTG	23	93138	mir-191	mmu xtr	HIST&NC
49	miR-124a	TTAAGGCACGCGGTGAATGC	20	40211	mir-124	odi sme gga	HIST&NC
50	miR-140	TACCACAGGGTAGAACCACGGA	22	33268	mir-140	gga mmu cfa bta	HIST&NC
51	let-7i	TGAGGTAGTAGTTTGTGCTGT	21	90040	let-7	mmu ssc gga	HIST&NC
52	miR-379-5p	TGGTAGACTATGGAACGTAGGT	22	42057	mir-379	oar	HIST&NC
53	miR-126a	TCGTACCGTGAGTAATAATGC	21	28425	mir-126	dre	HIST&NC
54	miR-134	TGTGACTGGTTGACCAGAGGGG	22	35700	mir-134	mmu ggo bta	HIST&NC
55	miR-34c	AGGCAGTGTAGTTAGCTGATTGC	23	21474	mir-34	tgu mmu bta	HIST&NC
56	miR-181b	AACATTCATTGCTGTCGGTGG	21	58650	mir-181	hsa gga ssc cfa pma	HIST&NC
57	miR-30e-5p	TGTAAACATCCTTGACTGGAAGCT	24	23796	mir-30	bta	HIST&NC
58	miR-541	AAGGGATTCTGATGTTGGTCACACT	25	35163	mir-541	mmu	HIST&NC
59	miR-30c	TGTAAACATCCTACACTCTCAGC	23	29977	mir-30	hsa gga pma dre	HIST&NC
60	miR-139-3p	TGGAGACGCGGCCCTGTTGGA	21	26965	mir-139	hsa mmu	HIST&NC
61	miR-382	GAAGTTGTTCGTGGTGGATTCG	22	22279	mir-154	hsa ppy ssc cfa	HIST&NC
62	miR-126-3p	TCGTACCGTGAGTAATAATGCG	22	15799	mir-126	mmu	HIST&NC
63	miR-132	TAACAGTCTACAGCCATGGTCG	22	19918	mir-132	mmu cfa pma	HIST&NC
64	miR-125a	TCCCTGAGACCCTTTAACCTGT	22	20899	mir-125	cfa dre bta	HIST&NC
65	miR-29b	TAGCACCATTTGAAATCAGTGTT	23	16733	mir-29	hsa ssc cte pma dre	HIST&NC
66	miR-380-5p	ATGGTTGACCATAGAACATGC	21	18007	mir-379	mmu oar	HIST&NC
67	miR-98	TGAGGTAGTAAGTTGTATTGT	21	20081	let-7	hsa	HIST&NC
68	miR-146b-5p	TGAGAACTGAATTCCATAGGCT	22	11684	mir-146	hsa	HIST&NC
69	miR-140*	ACCACAGGGTAGAACCACGGAC	22	35989	mir-140	mmu gga dre oan	HIST&NC
70	miR-16	TAGCAGCACGTAAATATTGGCG	22	15170	mir-15	hsa ppy gga pma	HIST&NC
71	miR-1a	TGGAATGTAAAGAAGTATGTAT	22	10649	mir-1	odi mmu pma	HIST&NC
72	miR-9a*	TAAAGCTAGATAACCGAAAGTA	22	11986	mir-9	pma	HIST&NC
73	miR-93	CAAAGTGCTGTTCGTGCAGGTAG	23	12430	mir-17	hsa bta ggo	HIST&NC
74	miR-99a	AACCCGTAGATCCGATCTTGT	21	15759	mir-99	hsa bta	HIST&NC
75	miR-27a	TTCACAGTGGCTAAGTTCCGC	21	9738	mir-27	hsa dre ggo	HIST&NC
76	miR-206	TGGAATGTAAGGAAGTGTGTGG	22	10427	mir-1	mmu ssc mdo	HIST&NC
77	miR-192	CTGACCTATGAATTGACAGC	20	11576	mir-192	hsa pma bta	HIST&NC
78	miR-7b	TGGAAGACTTGTGATTTTGTTGT	23	10554	mir-7	gga mmu pma dre	HIST&NC
79	miR-151-5p	TCGAGGAGCTCACAGTCTAGT	21	11043	mir-28	mmu	HIST&NC
80	miR-137	TTATTGCTTAAGAATACGCGTAG	23	17265	mir-137	tni gga mmu cfa bma dre pma	HIST&NC
81	miR-184	TGGACGGAGAACTGATAAGGGT	22	11474	mir-184	bmo mmu aga oan pma	HIST&NC
82	miR-1839	AAGGTAGATAGAACAGGTCTTG	22	16500	mir-1839	cfa	HIST&NC
83	miR-30b	TGTAAACATCCTACACTCAGCT	22	9667	mir-30	mmu mml pma	HIST&NC
84	miR-26b	TTCAAGTAATTCAGGATAGGTT	22	12986	mir-26	hsa dre bta	HIST&NC
85	miR-3068	TTGGAGTTCATGCAAGTTCTAACC	24	7135	undef	mmu	HIST&NC
86	miR-200a	TAACACTGTCTGGTAACGATGTT	23	18750	mir-8	mmu bfl bta	HIST&NC
87	miR-139	TCTACAGTGCACGTGTCTCCAGT	23	11000	mir-139	tgu cfa oan bta	HIST&NC
88	miR-429	TAATACTGTCTGGTAATGCCGT	22	16248	mir-8	hsa mmu mdo xla	HIST&NC
89	miR-22	AAGCTGCCAGTTGAAGAACTGT	22	6633	mir-22	hsa mdo	HIST&NC
90	miR-125a-5p	TCCCTGAGACCCTTTAACCTGTGA	24	8045	mir-125	mmu	HIST&NC
91	miR-872	AAGGTTACTTGTTAGTTCAGG	21	7512	mir-872	mmu cfa	HIST&NC
92	miR-378c	ACTGGACTTGGAGTCAGAAGGT	22	20465	undef	hsa	HIST&NC
93	miR-1224-5p	GTGAGGACTGGGGAGGTGGAGGG	23	15084	mir-1224	hsa ptr	HIST&NC
94	miR-16b	TAGCAGCACGTAAATATTGGC	21	5651	mir-15	xtr dre bta	HIST&NC
95	miR-1c	TGGAATGTAAAGAAGTATGTAC	22	5906	mir-1	odi sme gga pma	HIST&NC
96	miR-23b	ATCACATTGCCAGGGATTACC	21	18423	mir-23	ptr mmu cfa dre oan	HIST&NC
97	miR-30b-3p	CTTTCAGTCGGATGTTTGCAG	21	8517	mir-30	tgu	HIST&NC
98	miR-485	AGAGGCTGGCCGTGATGAATTCG	23	6538	mir-485	cfa	HIST&NC
99	miR-153	TTGCATAGTCACAAAAGTGATC	22	6594	mir-153	dpu mmu gga sko pma cin	HIST&NC
100	miR-218	TTGTGCTTGATCTAACCATGT	21	4578	mir-218	hsa	HIST&NC
101	miR-598	TACGTCATCGTCGTCATCGTTATC	24	13512	mir-598	hsa mmu	HIST&NC
102	miR-136*	CATCATCGTCTCAAATGAGTCT	22	6235	mir-136	hsa mmu	HIST&NC
103	miR-149	TCTGGCTCCGTGTCTTCACTCCC	23	6293	mir-149	mmu	HIST&NC
104	miR-1224	GTGAGGACTGGGGAGGTGGA	20	16522	mir-1224	mmu bta	HIST&NC
105	miR-320a	AAAAGCTGGGTTGAGAGGGCGA	22	4756	mir-320	hsa	HIST&NC
106	miR-23a	ATCACATTGCCAGGGATTTCC	21	9833	mir-23	hsa cfa pma dre mdo	HIST&NC
107	miR-185	TGGAGAGAAAGGCAGTTCCTGA	22	7305	mir-185	mmu	HIST&NC
108	miR-135a	TATGGCTTTTTATTCCTATGTGA	23	4378	mir-135	mmu	HIST&NC
109	miR-152	TCAGTGCATGACAGAACTTGG	21	6260	mir-148	fru mmu dre mdo	HIST&NC
110	miR-30c-2*	CTGGGAGAAGGCTGTTTACTCT	22	5862	mir-30	hsa	HIST&NC
111	miR-423-5p	TGAGGGGCAGAGAGCGAGACTTT	23	4894	mir-423	hsa	HIST&NC
112	miR-195	TAGCAGCACAGAAATATTGGCA	22	7405	mir-15	mmu bta mdo	HIST&NC
113	miR-1957	CAGTCGGTAGAGCATCAGA	19	5665	undef	mmu	HIST&NC
114	miR-96	TTTGGCACTAGCACATTTTTGC	22	5826	mir-96	hsa isc sko mml emu	HIST&NC
115	miR-92b	TATTGCACTCGTCCCGGCCTCC	22	5234	mir-25	sko xbo xtr oan dre	HIST&NC
116	miR-186	CAAAGAATTCTCCTTTTGGGCT	22	10660	mir-186	mmu ssc	HIST&NC
117	miR-181d	AACATTCATTGTTGTCGGTGGG	22	9122	mir-181	hsa	HIST&NC
118	miR-218a	TTGTGCTTGATCTAACCATGTGG	23	11206	mir-218	dre	HIST&NC
119	miR-422a	ACTGGACTTGGGGTCAGAAGGC	22	5753	mir-422	hsa ppy mml	HIST&NC
120	miR-1843-3p	TCTGATCGTTCACCTCCATACA	22	5366	mir-1843	mmu	HIST&NC
121	miR-126*	CATTATTACTTTTGGTACGC	20	2936	mir-126	tgu	HIST&NC
122	miR-25	CATTGCACTTGTCTCGGTCTGA	22	3478	mir-25	hsa ptr	HIST&NC
123	miR-221	AGCTACATTGTCTGCTGGGTTT	22	8680	mir-221	hsa pma bta	HIST&NC
124	miR-434-5p	GCTCGACTCATGGTTTGAACC	21	3588	mir-434	mmu	HIST&NC
125	miR-126	TCGTACCGTGAGTAATAATGCGA	23	5902	mir-126	gga cin bta	HIST&NC
126	miR-141	TAACACTGTCTGGTAAAGATGGC	23	5975	mir-8	mmu mml dre mdo	HIST&NC
127	miR-384-5p	TGTAAACAATTCCTAGGCAATGT	23	3461	mir-384	mmu	HIST&NC
128	miR-150	TCTCCCAACCCTTGTACCAGTG	22	4311	mir-150	mmu xtr dre mdo bta	HIST&NC
129	miR-664*	GCTGGCTGGGGAAAATGATTGGA	23	4763	mir-664	hsa mmu	HIST&NC
130	miR-136	ACTCCATTTGTTTTGATGATGG	22	3511	mir-136	hsa mmu	HIST&NC
131	miR-219-3p	AGAATTGTGGCTGGACATCTG	21	6342	mir-219	bta	HIST&NC
132	miR-369-3p	AATAATACATGGTTGATCTTT	21	2935	mir-154	hsa	HIST&NC
133	miR-300	TATGCAAGGGCAAGCTCTCTTC	22	3041	mir-154	mmu	HIST&NC
134	miR-338-3p	TCCAGCATCAGTGATTTTGTTG	22	4108	mir-338	mmu	HIST&NC
135	miR-129	CTTTTTGCGGTCTGGGCTTGCA	22	3603	mir-129	dre	HIST&NC
136	miR-146a	TGAGAACTGAATTCCATGGGTT	22	5703	mir-146	mmu oan dre bta	HIST&NC
137	miR-770-3p	GTGGGCCTGACGTGGAGCTGG	21	4069	mir-770	mmu	HIST&NC
138	miR-92a	TATTGCACTTGTCCCGGCCTGT	22	3776	mir-25	sko mmu aga xbo pma hsa odi ame bfl spu	HIST&NC
139	miR-361-5p	TTATCAGAATCTCCAGGGGTAC	22	2859	mir-361	hsa	HIST&NC
140	let-7d*	CTATACGACCTGCTGCCTTTCT	22	2741	let-7	hsa	HIST&NC
141	miR-1843-5p	TATGGAGGTCTCTGTCTGACT	21	5810	mir-1843	mmu	HIST&NC
142	miR-384-3p	ATTCCTAGAAATTGTTCACAAT	22	2214	mir-384	mmu	HIST&NC
143	miR-204	TTCCCTTTGTCATCCTATGCCT	22	2696	mir-204	mmu	HIST&NC
144	miR-181a*	ACCATCGACCGTTGATTGTACC	22	3102	mir-181	hsa pma	HIST&NC
145	miR-181c	AACATTCAACCTGTCGGTGAGT	22	4058	mir-181	hsa cfa dre oan bta	HIST&NC
146	miR-4006b-5p	TTGGAACAATGTAGGTAAGGG	21	3841	undef	cin	HIST&NC
147	miR-410	AATATAACACAGATGGCCTGT	21	2245	mir-154	mmu	HIST&NC
148	miR-212	TAACAGTCTCCAGTCACGGCC	21	3533	mir-132	hsa	HIST&NC
149	miR-212-5p	ACCTTGGCTCTAGACTGCTTACT	23	1735	mir-132	mmu	HIST&NC
150	miR-139-5p	TCTACAGTGCACGTGTCTCCAG	22	2488	mir-139	hsa	HIST&NC
151	miR-376b*	GTGGATATTCCTTCTATGGTT	21	3332	mir-368	mmu	HIST&NC
152	miR-212-3p	TAACAGTCTCCAGTCACGGCCA	22	4027	mir-132	mmu	HIST&NC
153	miR-4206-3p	ATTGGATGGTTTAGTGAGGC	20	1593	undef	cin	HIST&NC
154	miR-542-3p	TGTGACAGATTGATAACTGA	20	3424	mir-542	mmu	HIST&NC
155	miR-125b-1*	ACGGGTTAGGCTCTTGGGAGT	21	2027	mir-125	hsa	HIST&NC
156	miR-672	TGAGGTTGGTGTACTGTGTGTGA	23	1529	mir-672	mmu	HIST&NC
157	miR-126-5p	CATTATTACTTTTGGTACGCG	21	1954	mir-126	mmu	HIST&NC
158	miR-125-2*	ACGGGTTAGGCTCTTGGGAGC	21	2706	mir-125	tgu	HIST&NC
159	miR-129-3p	AAGCCCTTACCCCAAAAAGCAT	22	2513	mir-129	hsa	HIST&NC
160	miR-29c	TAGCACCATTTGAAATCGGTTA	22	3719	mir-29	mmu gga	HIST&NC
161	miR-3099	TAGGCTAGAAAGAGGTTGGGGA	22	5549	undef	mmu	HIST&NC
162	miR-708	AAGGAGCTTACAATCTAGCTGGG	23	2474	mir-708	mmu	HIST&NC
163	miR-148b*	GAAGTTCTGTTATACACTCAGGC	23	1332	mir-148	hsa mmu	HIST&NC
164	miR-433	ATCATGATGGGCTCCTCGGTGT	22	3024	mir-433	mmu	HIST&NC
165	miR-488	TTGAAAGGCTGTTTCTTGGTC	21	5253	mir-488	hsa mmu	HIST&NC
166	miR-760-3p	TCGGCTCTGGGTCTGTGGGGA	21	5617	mir-760	mmu	HIST&NC
167	miR-375	TTTGTTCGTTCGGCTCGCGTGA	22	1541	mir-375	hsa bfl ame dre spu mdo	HIST&NC
168	miR-20a	TAAAGTGCTTATAGTGCAGGTAG	23	1173	mir-17	hsa oan pma	HIST&NC
169	miR-17	CAAAGTGCTTACAGTGCAGGTAG	23	1075	mir-17	hsa	HIST&NC
170	miR-342	TCTCACACAGAAATCGCACCCGTC	24	1318	mir-342	ssc bta	HIST&NC
171	miR-369-5p	AGATCGACCGTGTTATATTCGC	22	1192	mir-154	hsa eca oar	HIST&NC
172	miR-130a	CAGTGCAATGTTAAAAGGGCAT	22	2763	mir-130	mmu gga mml mdo	HIST&NC
173	miR-138b	AGCTGGTGTTGTGAATCAGGCCGA	24	3884	mir-138	cfa pma	HIST&NC
174	miR-320	AAAAGCTGGGTTGAGAGGGCGAA	23	4692	mir-320	ssc xtr	HIST&NC
175	miR-708*	CAACTAGACTGTGAGCTTCT	20	2225	mir-708	mmu	HIST&NC
176	miR-486-5p	TCCTGTACTGAGCTGCCCCGAG	22	2567	mir-486	hsa	HIST&NC
177	miR-326	CCTCTGGGCCCTTCCTCCAGT	21	1496	mir-326	hsa mmu eca	HIST&NC
178	miR-2478	TCGTATCCCACTTCTGACACCA	22	3453	undef	bta	HIST&NC
179	miR-485-5p	AGAGGCTGGCCGTGATGAATTC	22	2636	mir-485	hsa	HIST&NC
180	miR-378b	CTGGACTTGGAGTCAGAAGGA	21	1256	undef	hsa mmu	HIST&NC
181	miR-24b	TGGCTCAGTTCAGCAGGAA	19	2078	mir-24	xtr	HIST&NC
182	miR-652	AATGGCGCCACTAGGGTTGTG	21	2143	mir-652	hsa ssc cfa	HIST&NC
183	miR-344	TGATCTAGCCAAAGCCTGACTGT	23	1001	mir-344	mmu	HIST&NC
184	miR-106b	TAAAGTGCTGACAGTGCAGATA	22	1723	mir-17	mmu	HIST&NC
185	miR-1298*	CATCTGGGCAACTGATTGAACT	22	1799	mir-1298	mmu	HIST&NC
186	miR-4510	TGAGGGAGTAGGTTGTATGGTT	22	1304	undef	hsa	HIST&NC
187	miR-222	AGCTACATCTGGCTACTGGGTCT	23	5096	mir-221	hsa gga	HIST&NC
188	miR-376b	ATCATGGAGGAACATCCACTT	21	1759	mir-368	hsa mmu ssc	HIST&NC
189	miR-132*	ACCGTGGCTTTCGATTGTTACT	22	1403	mir-132	hsa mmu	HIST&NC
190	miR-411a-3p	TATGTAACACGGTCCACTAAC	21	766	mir-379	oar	HIST&NC
191	miR-370	GCCTGCTGGGGTGGAACCTGGT	22	1002	mir-370	hsa	HIST&NC
192	miR-423-3p	AGCTCGGTCTGAGGCCCCTCAGT	23	1864	mir-423	hsa bta	HIST&NC
193	miR-487b	AATCGTACAGGGTCATCCACTT	22	1563	mir-154	hsa	HIST&NC
194	miR-15a	TAGCAGCACATAATGGTTTGTGGA	24	1646	mir-15	hsa gga mdo	HIST&NC
195	miR-200b*	CATCTTACTGGGCAGCATTGGA	22	1752	mir-8	tgu mmu oan	HIST&NC
196	miR-203	GTGAAATGTTTAGGACCACTAG	22	2981	mir-203	gga mmu	HIST&NC
197	miR-495	AAACAAACATGGTGCACTTCTT	22	1506	mir-329	hsa	HIST&NC
198	miR-9b	TCTTTGGTTACCTAGCTGTATGA	23	1225	mir-9	aae sme ame xtr	HIST&NC
199	miR-3968	TCGAATCCCACTTCTGACACCA	22	1503	undef	mmu	HIST&NC
200	miR-335*	TTTTTCATTATTGCTCCTGACC	22	954	mir-335	hsa	HIST&NC
201	miR-10a	TACCCTGTAGATCCGAATTTGT	22	1036	mir-10	hsa ppy dre	HIST&NC
202	miR-33	GTGCATTGTAGTTGCATTGC	20	684	mir-33	gga bfl spu	HIST&NC
203	miR-582-3p	TAACCTGTTGAACAACTGAACC	22	1123	mir-582	hsa mmu eca	HIST&NC
204	miR-3535	TGGATATGATGACTGATTACCTGAGA	26	1111	undef	gga	HIST&NC
205	miR-2779	TCGTTTCCGGCTCGAAGGACCA	22	1566	undef	bmo	HIST&NC
206	miR-30b*	CTGGGATGTGGATGTTTACGTC	22	1469	mir-30	mmu	HIST&NC
207	miR-181d-5p	AACATTCATTGTTGTCGGTGGGTT	24	1011	mir-181	ssc	HIST&NC
208	miR-1298	TTCATTCGGCTGTCCAGATGTA	22	907	mir-1298	hsa	HIST&NC
209	miR-148a*	AAAGTTCTGAGACACTCTGACT	22	856	mir-148	hsa	HIST&NC
210	miR-879	AGAGGCTTATAGCTCTAAGC	20	685	mir-879	mmu	HIST&NC
211	miR-493*	TTGTACATGGTAGGCTTTCATT	22	639	mir-493	hsa mmu	HIST&NC
212	miR-145	GTCCAGTTTTCCCAGGAATCCCT	23	1070	mir-145	ssc mmu oan dre	HIST&NC
213	miR-125b-2*	ACAAGTCAGGCTCTTGGGAC	20	1498	mir-125	hsa	HIST&NC
214	miR-190	TGATATGTTTGATATATTAGG	21	1090	mir-190	mmu bfl	HIST&NC
215	miR-543	AAACATTCGCGGTGCACTTCTT	22	513	mir-329	mmu	HIST&NC
216	miR-187	TCGTGTCTTGTGTTGCAGCCGG	22	1593	mir-187	gga mmu xtr ggo	HIST&NC
217	miR-28-3p	CACTAGATTGTGAGCTCCTGGA	22	1073	mir-28	hsa	HIST&NC
218	miR-425	AATGACACGATCACTCCCGTTGA	23	1171	mir-425	mmu mdo	HIST&NC
219	miR-219-5p	TGATTGTCCAAACGCAATTCTTG	23	777	mir-219	hsa dme	HIST&NC
220	miR-28-5p	AAGGAGCTCACAGTCTATTGAG	22	869	mir-28	hsa	HIST&NC
221	miR-431*	TGCAGGTCGTCTTGCAGGGCTTC	23	1633	mir-431	mmu	HIST&NC
222	miR-24-2*	GTGCCTACTGAGCTGAAACAGT	22	568	mir-24	mmu	HIST&NC
223	miR-139*	TGGAGACGCGGCCCTGTTGGAAT	23	590	mir-139	tgu	HIST&NC
224	miR-107	AGCAGCATTGTACAGGGCTAT	21	1483	mir-103	hsa cfa bta	HIST&NC
225	miR-708-3p	AACTAGACTGTGAGCTTCTAGA	22	1135	mir-708	ssc	HIST&NC
226	miR-34a	TGGCAGTGTCTTAGCTGGTTGT	22	1241	mir-34	hsa gga	HIST&NC
227	miR-154	TAGGTTATCCGTGTTGCCTTCG	22	481	mir-154	mmu	HIST&NC
228	miR-4938	ATCATCATCATCATTATCATC	21	386	undef	cel	HIST&NC
229	miR-409-5p	AGGTTACCCGAGCAACTTTGC	21	646	mir-154	mmu	HIST&NC
230	miR-301a	CAGTGCAATAGTATTGTCAAAGC	23	461	mir-130	mmu dre	HIST&NC
231	miR-27a-3p	TTCACAGTGGCTAAGTTCCG	20	562	mir-27	bta	HIST&NC
232	miR-22-3p	AAGCTGCCAGTTGAAGAAC	19	569	mir-22	bta	HIST&NC
233	miR-124*	CGTGTTCACAGCGGACCTTGA	21	586	mir-124	tgu mmu	HIST&NC
234	miR-144*	GGATATCATCATATACTGTAAGT	23	837	mir-144	hsa mmu	HIST&NC
235	miR-22*	AGTTCTTCAGTGGCAAGCTTT	21	801	mir-22	hsa xtr	HIST&NC
236	miR-671-5p	AGGAAGCCCTGGAGGGGCTGGAGG	24	640	mir-671	hsa	HIST&NC
237	let-7a-1*	CTATACAATCTACTGTCTTTCT	22	670	let-7	mmu	HIST&NC
238	miR-219	TGATTGTCCAAACGCAATTCTT	22	394	mir-219	odi xbo csa dre oan spu	HIST&NC
239	miR-1260	ATCCCACCGCTGCCACCA	18	584	mir-1260	hsa	HIST&NC
240	miR-543-3p	AAACATTCGCGGTGCACTTCTTT	23	459	mir-329	oar	HIST&NC
241	miR-19b	TGTGCAAATCCATGCAAAACTGA	23	482	mir-19	hsa cfa	HIST&NC
242	miR-15b	TAGCAGCACATCATGGTTTACA	22	547	mir-15	mmu cfa oan dre	HIST&NC
243	miR-574-3p	CACGCTCATGCACACACCCACA	22	439	mir-574	hsa	HIST&NC
244	miR-376a	ATCGTAGAGGAAAATCCACGT	21	788	mir-368	hsa mmu	HIST&NC
245	miR-935	CAGTTACCGCTTCCGCTACCGC	22	453	mir-935	hsa	HIST&NC
246	miR-2487	TGGCTCTAAGGGCTGGGTCGGTCGGG	26	3588	undef	bta	HIST&NC
247	miR-124-3p	TAAGGCACGCGGTGAATGCCAAA	23	2317	mir-124	sja dme	HIST&NC
248	miR-384	TCATTCCTAGAAATTGTTCACA	22	793	mir-384	hsa eca	HIST&NC
249	miR-27a*	AGGGCTTAGCTGCTTGTGAGCA	22	350	mir-27	hsa	HIST&NC
250	miR-504	GACCCTGGTCTGCACTCTGTC	21	500	mir-504	ssc bta	HIST&NC
251	miR-138-1*	GCTACTTCACAACACCAGGGT	21	622	mir-138	hsa mmu	HIST&NC
252	miR-194	TGTAACAGCAACTCCATGTGGA	22	386	mir-194	mmu pma	HIST&NC
253	miR-2881	CGGGGTCGGGGGGGCGGTG	19	861	undef	bta	HIST&NC
254	miR-99b*	CAAGCTCGTGTCTGTGGGTCCG	22	858	mir-99	mmu	HIST&NC
255	miR-873	TGCAGGAACTTGTGAGTCTCC	21	648	mir-873	mmu oan	HIST&NC
256	miR-3068*	GTGAATTGCAGTACTCCAACA	21	1567	undef	mmu	HIST&NC
257	miR-1249	ACGCCCTTCCCCCCCTTCTTCA	22	485	mir-1249	mmu	HIST&NC
258	miR-7-1*	CAACAAATCACAGTCTGCCATA	22	339	mir-7	hsa	HIST&NC
259	miR-199	ACAGTAGTCTGCACATTGGTT	21	373	mir-199	oan	HIST&NC
260	miR-1843b-5p	ATGGAGGTCTCTGTCTGACTT	21	836	mir-1843	mmu	HIST&NC
261	miR-486-3p	CGGGGCAGCTCAGTACAGGATG	22	377	mir-486	hsa	HIST&NC
262	miR-3473b	TAGGGCTGGAGAGATGGCTCA	21	1427	mir-3473	mmu	HIST&NC
263	miR-106b*	CCGCACTGTGGGTACTTGCTG	21	1009	mir-17	mmu	HIST&NC
264	miR-32	TATTGCACATTACTAAGTTGC	21	307	mir-32	hsa gga cfa oan	HIST&NC
265	miR-142-3p	TGTAGTGTTTCCTACTTTATGG	22	504	mir-142	mmu gga	HIST&NC
266	miR-490-3p	CAACCTGGAGGACTCCATGCTG	22	246	mir-490	hsa	HIST&NC
267	miR-194a	TGTAACAGCAACTCCATGTGG	21	223	mir-194	dre	HIST&NC
268	miR-1285	CTGGGCAACATAGCGAGACCCCGTCTCTA	29	889	undef	ssc	HIST&NC
269	miR-4497	CTCCGGGACGGCTGGGAAGGC	21	306	undef	hsa	HIST&NC
270	miR-872*	TGAACTATTGCAGTAGCCTCCT	22	401	mir-872	mmu	HIST&NC
271	miR-539	GGAGAAATTATCCTTGGTGTGT	22	512	mir-154	hsa	HIST&NC
272	miR-125a-3p	ACAGGTGAGGTTCTTGGGAGC	21	363	mir-125	mmu	HIST&NC
273	miR-181c*	ACCATCGACCGTTGAGTGGACC	22	551	mir-181	hsa mmu	HIST&NC
274	miR-29e	TAGCACCATTTGAAATCAGTGTTT	24	229	mir-29	bta	HIST&NC
275	miR-31	AGGCAAGATGCTGGCATAGCTG	22	406	mir-31	hsa mmu gga cfa	HIST&NC
276	miR-16-1*	CCAGTATTGACTGTGCTGCTGA	22	244	mir-15	mmu	HIST&NC
277	miR-210	CTGTGCGTGTGACAGCGGCTGA	22	415	mir-210	hsa bmo ppy dre mdo lmi bta	HIST&NC
278	miR-676	CCGTCCTGAGCTTGTCGAGC	20	301	mir-676	mmu	HIST&NC
279	miR-720	ATCTCGCTGGGGCCTCCA	18	696	mir-720	hsa mmu	HIST&NC
280	miR-106	TAAAGTGCTTATAGTGCAGGTAGA	24	208	mir-17	xtr	HIST&NC
281	let-7e*	CTATACGGCCTCCTAGCTTTCC	22	279	let-7	hsa	HIST&NC
282	miR-345	CCTGAACTAGGGGTCTGGAGT	21	172	mir-345	cfa	HIST&NC
283	miR-4454	TCGAATCCGAGTCACGGCACCA	22	414	undef	hsa	HIST&NC
284	miR-3102	GAGCACCCCATTGGCTACCCACA	23	499	undef	mmu	HIST&NC
285	miR-130b	CAGTGCAATGATGAAAGGGCAT	22	197	mir-130	mmu	HIST&NC
286	miR-1268	CGCGGGGTGTGGTGGGGGC	19	474	mir-1268	hsa ppy	HIST&NC
287	miR-3896-5p	ATATCTCGGTGGAACCTCCA	20	152	undef	tca	HIST&NC
288	let-7b*	CTATACAACCTACTGCCTTCCT	22	257	let-7	hsa oan	HIST&NC
289	miR-31b	AGGCAAGATGCTGGCATAGCTGA	23	190	mir-31	sme	HIST&NC
290	miR-499-5p	TTAAGACTTGCAGTGATGTTT	21	176	mir-499	hsa	HIST&NC
291	miR-323a-5p	AGGTGGTCCGTGGCGCGTTCG	21	170	mir-154	oar	HIST&NC
292	miR-17-5p	CAAAGTGCTTACAGTGCAGGTAGA	24	241	mir-17	gga	HIST&NC
293	miR-592	TTGTGTCAATATGCGATGATG	21	304	mir-592	hsa mmu	HIST&NC
294	miR-193b	AACTGGCCCACAAAGTCCCGCT	22	252	mir-193	gga mmu	HIST&NC
295	miR-84a	AGAGGTGTAGAATAAGTG	18	141	mir-84	ppc	HIST&NC
296	miR-674*	CACAGCTCCCATCTCAGAACA	21	378	mir-674	mmu	HIST&NC
297	miR-674	GCACTGAGATGGGAGTGGTGT	21	491	mir-674	mmu	HIST&NC
298	miR-668	TGTCACTCGGCTCGGCCCACTACC	24	484	mir-668	hsa mmu	HIST&NC
299	let-7k	TGAGGTAGTAGATTGAATAGTT	22	218	let-7	gga	HIST&NC
300	miR-7a-2*	CAACAAGTCCCAGTCTGCCACA	22	189	mir-7	mmu	HIST&NC
301	miR-451	AAACCGTTACCATTACTGAGTTT	23	339	mir-451	hsa gga	HIST&NC
302	miR-739	AAGGCCGAAGTGGAGAAGGG	20	1014	undef	mdo	HIST&NC
303	miR-874	CTGCCCTGGCCCGAGGGACCGAC	23	249	mir-874	mmu	HIST&NC
304	miR-100-5p	AACCCGTAGATCCGAACTTGTGAA	24	365	mir-99	tca dme	HIST&NC
305	miR-337-5p	AACGGCGTCATGCAGGAGTTGA	22	265	mir-337	mmu	HIST&NC
306	miR-263	TGTATGGCACTGGTAGAATTCAC	23	216	mir-263	aga	HIST&NC
307	miR-582-5p	ATACAGTTGTTCAACCAGTTAC	22	248	mir-582	hsa mmu	HIST&NC
308	miR-1247*	CGGGAACGTCGAGACTGGAGC	21	152	mir-1247	mmu	HIST&NC
309	miR-138-2*	GCTATTTCACGACACCAGGGT	21	249	mir-138	hsa mmu	HIST&NC
310	miR-29b-2*	CTGGTTTCACATGGTGGCTTAGA	23	244	mir-29	hsa mmu	HIST&NC
311	miR-1983	CTCACCTGGAGCATGTTTTCC	21	319	undef	mmu	HIST&NC
312	miR-199a-3p	ACAGTAGTCTGCACATTGGTTA	22	212	mir-199	mmu eca	HIST&NC
313	let-7a*	CTATACAATCTACTGTCTTTC	21	130	let-7	hsa	HIST&NC
314	miR-5109	AACTGGTGCGGACCAGGGGAATCCGAC	27	623	undef	mmu	HIST&NC
315	miR-29a*	ACTGATTTCTTTTGGTGTTCAGA	23	267	mir-29	hsa pma	HIST&NC
316	miR-29c*	TGACCGATTTCTCCTGGTGTTC	22	358	mir-29	mmu	HIST&NC
317	miR-532-3p	CCTCCCACACCCAAGGCTTGC	21	189	mir-188	hsa	HIST&NC
318	miR-503	TAGCAGCGGGAACAGTACTGCAG	23	278	mir-503	mmu cfa	HIST&NC
319	miR-376c	AACATAGAGGAAATTTCACGT	21	192	mir-368	mmu	HIST&NC
320	miR-128-1*	CGGGGCCGTAGCACTGTCTGA	21	255	mir-128	mmu	HIST&NC
321	miR-378d	ACTGGACTTGGAGTCAGAA	19	166	undef	hsa	HIST&NC
322	miR-362	AATCCTTGGAACCTAGGTGTGAATGC	26	99	mir-362	ssc	HIST&NC
323	miR-5097	AGGGTTCAAGTCCCTGTTCGGGCGCCA	27	338	undef	mmu	HIST&NC
324	miR-135a-1*	TATAGGGATTGGAGCCGTGGC	21	322	mir-135	mmu	HIST&NC
325	miR-431	TGTCTTGCAGGCCGTCATGCA	21	165	mir-431	mmu oar	HIST&NC
326	miR-124b	TAAGGCACGCGGTGAATGAGA	21	597	mir-124	egr odi sme gga	HIST&NC
327	miR-490-5p	CCATGGATCTCCAGGTGGGT	20	156	mir-490	hsa	HIST&NC
328	miR-10	ACCCTGTAGATCCGAATTTGT	21	120	mir-10	dps spu	HIST&NC
329	miR-758	TTTGTGACCTGGTCCACTAACCC	23	164	mir-379	hsa ssc	HIST&NC
330	miR-380-3p	TATGTAGTATGGTCCACATCTT	22	133	mir-379	mmu	HIST&NC
331	miR-193b*	CGGGGTTTTGAGGGCGAGATGA	22	129	mir-193	hsa	HIST&NC
332	miR-129-1-3p	AAGCCCTTACCCCAAAAAGTAT	22	123	mir-129	mmu	HIST&NC
333	miR-4507	CTGGGTCGGTCGGGCTGGGG	20	296	undef	hsa	HIST&NC
334	miR-379-3p	TATGTAACACGGTCCACTAAT	21	142	mir-379	oar	HIST&NC
335	miR-92	TATTGCACTCGTCCCGGCCT	20	139	mir-25	dpu bma	HIST&NC
336	miR-671-3p	TCCGGTTCTCAGGGCTCCACC	21	132	mir-671	hsa	HIST&NC
337	miR-500	AATGCACCTGGGCAAGGGTTC	21	128	mir-500	mmu	HIST&NC
338	miR-499	TTAAGACTTGCAGTGATGTTTA	22	114	mir-499	gga dre xtr	HIST&NC
339	miR-17a	CAAAGTGCTTACAGTGCAGGTA	22	141	mir-17	dre pma	HIST&NC
340	miR-184b	TGGACGGAGAACTGATAAGGA	21	96	mir-184	api	HIST&NC
341	miR-433*	TACGGTGAGCCTGTCATTATTC	22	117	mir-433	mmu	HIST&NC
342	miR-770-5p	AGCACCACGTGTCTGGGCCACGT	23	164	mir-770	mmu eca	HIST&NC
343	miR-190a	TGATATGTTTGATATATTAGGTTG	24	82	mir-190	pma	HIST&NC
344	miR-142-5p	CCCATAAAGTAGAAAGCACTAC	22	107	mir-142	mmu gga xtr	HIST&NC
345	miR-1-3p	TGGAATGTAAAGAAGTATGGAG	22	117	mir-1	cin dme	HIST&NC
346	miR-199*	TACAGTAGTCTGCACATTGGTT	22	160	mir-199	gga dre	HIST&NC
347	miR-873*	GAGACTGACAAGTTCCCGGGA	21	156	mir-873	mmu	HIST&NC
348	miR-424	CAGCAGCAATTCATGTTTTG	20	163	mir-322	hsa bta	HIST&NC
349	miR-185*	AGGGGCTGGCTTTCCTCTGGT	21	276	mir-185	hsa mmu	HIST&NC
350	miR-412-5p	TGGTCGACCAGCTGGAAAGTA	21	178	mir-412	mmu	HIST&NC
351	miR-490*	CAACCTGGAGGACTCCATGCTGT	23	151	mir-490	oan	HIST&NC
352	miR-877	GTAGAGGAGATGGCGCAGGGGACA	24	209	mir-877	mmu	HIST&NC
353	miR-673-3p	TCCGGGACTGAGTTCTGTGCACC	23	78	mir-673	mmu	HIST&NC
354	miR-370-5p	CAGGTCACGTCTCTGCAGTTAC	22	71	mir-370	oar	HIST&NC
355	miR-1268b	CGGGGTGTGGTGGGGGCGC	19	164	undef	hsa	HIST&NC
356	miR-1188	TGGTGTGAGGTTGGGCCAGGA	21	127	mir-1188	mmu	HIST&NC
357	let-7f-2*	CTATACAGTCTACTGTCTTTCT	22	89	let-7	hsa mmu	HIST&NC
358	miR-1839-3p	AGACCTACTTATCTACCAACAG	22	169	mir-1839	ssc mmu	HIST&NC
359	miR-455-5p	TATGTGCCTTTGGACTACATCG	22	87	mir-455	hsa	HIST&NC
360	miR-3102-5p.2	GGTGGTGCAGGCAGGAGAGCC	21	255	undef	mmu	HIST&NC
361	miR-30d*	CTTTCAGTCAGATGTTTGCTGC	22	144	mir-30	hsa oan	HIST&NC
362	miR-1246	ATGGATTTTTGGAACTAGGA	20	203	mir-1246	hsa	HIST&NC
363	miR-411b-3p	TATGTAACATGGTCCACTAA	20	135	mir-379	oar	HIST&NC
364	miR-142	CCCATAAAGTAGAAAGCACT	20	73	mir-142	tgu cfa	HIST&NC
365	miR-485-3p	GTCATACACGGCTCTCCTCTCT	22	89	mir-485	hsa	HIST&NC
366	let-7a	TGAGGTAGTAGGTTATGGT	19	98	let-7	cin	HIST&NC
367	miR-29b-1*	GCTGGTTTCATATGGTGGTTTAGA	24	90	mir-29	hsa mmu	HIST&NC
368	miR-133-3p	TTGGTCCCCTTCAACCAGCTGT	22	86	mir-133	dme	HIST&NC
369	miR-365	TAATGCCCCTAAAAATCCTTAT	22	86	mir-365	hsa	HIST&NC
370	miR-34b-3p	AATCACTAACTCCACTGCCATC	22	76	mir-34	mmu	HIST&NC
371	miR-339	TGAGCGCCTCGACGACAGAGC	21	126	mir-339	ptr bta	HIST&NC
372	miR-3059	TTTCCTCTCTGCCCCATAGGGT	22	119	undef	mmu	HIST&NC
373	miR-148	TCAGTGCATTACAGAACTTTGT	22	76	mir-148	dre	HIST&NC
374	miR-218b	TTGTGCTTGATCTAACCATGA	21	76	mir-218	pma dre	HIST&NC
375	miR-4006f-5p	GGAACAATGTAGGTAAGGG	19	99	undef	cin	HIST&NC
376	miR-5115	CTCTGGACGCGAGCCGGGCCC	21	388	undef	mmu	HIST&NC
377	miR-34c*	AATCACTAACCACACAGCCAGG	22	70	mir-34	mmu	HIST&NC
378	miR-1607	AAGGGCGGGAAGGGTCTGGGC	21	75	undef	gga	HIST&NC
379	miR-2476	TCCCTGGTCTAGTGGTTAGG	20	314	mir-2476	ssc bta	HIST&NC
380	miR-184-3p	TGGACGGAGAACTGATAAGGGC	22	60	mir-184	dme	HIST&NC
381	miR-381-3p	TATACAAGGGCAAGCTCTCT	20	89	mir-154	oar	HIST&NC
382	miR-143*	GGTGCAGTGCTGCATCTCTGG	21	73	mir-143	hsa mmu oan	HIST&NC
383	miR-33a	GTGCATTGTAGTTGCATTGCA	21	113	mir-33	hsa mml pma	HIST&NC
384	miR-133	TTTGGTCCCCTTCAACCAGCTGT	23	98	mir-133	tgu bfl cin spu	HIST&NC
385	miR-3085-3p	TCTGGCTGCTATGGCCCCCTCT	22	107	mir-3085	mmu	HIST&NC
386	miR-2995	AAGCACTGTTCGTAACCTGT	20	51	undef	tgu	HIST&NC
387	miR-542-5p	CTCGGGGATCATCATGTCACG	21	67	mir-542	mmu ssc	HIST&NC
388	miR-378g	ACTGGGCTTGGAGTCAGAAG	20	176	undef	hsa	HIST&NC
389	miR-30a-3p	CTTTCAGTCAGATGTTTGCAGC	22	58	mir-30	xtr	HIST&NC
390	miR-7*	CAACAAATCACAGTCTGCCAT	21	64	mir-7	tgu sko	HIST&NC
391	miR-152a	TCAGTGCATGACAGAACTTGA	21	47	mir-148	pma	HIST&NC
392	miR-124e	TAAGGCACGCTGTGAATGC	19	47	mir-124	sme	HIST&NC
393	miR-4289	CATTGTACAGGGCTATGA	18	56	undef	hsa	HIST&NC
394	miR-540-3p	AGGTCAGAGGTCGATCCTGG	20	47	mir-540	mmu	HIST&NC
395	miR-187*	AGGCTACAACACAGGACCCGGG	22	107	mir-187	hsa mmu	HIST&NC
396	miR-218-2*	CATGGTTCTGTCAAGCACCGCG	22	142	mir-218	hsa	HIST&NC
397	miR-2899	CGGCGGGCGCGGGGTGTGG	19	83	undef	bta	HIST&NC
398	miR-370-3p	GCCTGCTGGGGTGGAACCTGGTA	23	103	mir-370	oar	HIST&NC
399	miR-378*	CTCCTGACTCCAGGTCCTGTGT	22	70	mir-378	hsa	HIST&NC
400	miR-203a	GTGAAATGTTTAGGACCACTGG	22	84	mir-203	pma	HIST&NC
401	miR-4644	TGGAGGAGAGAAAAAGAGACAGA	23	52	undef	hsa	HIST&NC
402	miR-193*	TGGGTCTTTGCGGGCAAGATGA	22	55	mir-193	mmu	HIST&NC
403	miR-263a-5p	TATGGCACTGGAAGAATTCAC	21	176	mir-263	tca dme	HIST&NC
404	miR-4651	GGGCTGGGTCGGTCGGGC	18	42	undef	hsa	HIST&NC
405	miR-129*	AAGCCCTTACCCCAAAAAGT	20	71	mir-129	oan	HIST&NC
406	miR-455	GCAGTCCACGGGCATATACAC	21	99	mir-455	tgu mmu bta	HIST&NC
407	miR-20	TAAAGTGCTTATAGTGCAGGTA	22	69	mir-17	ssc xla	HIST&NC
408	miR-450a-2*	ATTGGGGACGCTTCGCATTCAT	22	64	mir-450	mmu	HIST&NC
409	miR-27e	TTCACAGTGGCTAAGTTCCGTAG	23	63	mir-27	dre	HIST&NC
410	miR-1290	TGGATTTTTGGAACTAGGA	19	85	mir-1290	hsa ppy	HIST&NC
411	miR-1940	CTGGAGGACCAAGAAGGCGGAGTCTGA	27	90	undef	mmu bta	HIST&NC
412	let-7c-1*	CTGTACAACCTTCTAGCTTTCC	22	44	let-7	mmu	HIST&NC
413	miR-298	GGCAGAGGAGGGCTGTTCTTC	21	156	mir-298	mmu	HIST&NC
414	miR-296-5p	AGGGCCCCCCCTCAATCCTGT	21	43	mir-296	mmu	HIST&NC
415	miR-133a	TTTGGTCCCCTTCAACCAGCTG	22	41	mir-133	mmu	HIST&NC
416	miR-154*	AATCATACACGGTTGACCTATT	22	35	mir-154	mmu	HIST&NC
417	miR-4154-3p	TTTTGTTGGTTTTCGGAACT	20	93	undef	cin	HIST&NC
418	miR-331-5p	CTAGGTATGGTCCCAGGGATC	21	105	mir-331	ssc mmu	HIST&NC
419	miR-18a	TAAGGTGCATCTAGTGCAGATAG	23	53	mir-17	hsa gga	HIST&NC
420	miR-452	AACTGTTTGCAGAGGAAACTGA	22	48	mir-452	hsa	HIST&NC
421	miR-1013-3p	ATAAACGATGCCGACTGG	18	29	mir-1013	dme	HIST&NC
422	miR-744*	CTGTTACCACTAACCTCAACC	21	57	mir-744	mmu	HIST&NC
423	miR-149*	GAGGGAGGGACGGGGGCGGTGC	22	75	mir-149	hsa mmu	HIST&NC
424	miR-539-3p	CATACAAGGGTAATTTCTTTTT	22	38	mir-154	mmu oar	HIST&NC
425	miR-26a-2*	CCTATTCTTGATTACTTGTTTC	22	33	mir-26	hsa	HIST&NC
426	miR-125c	TCCCTGAGACCCTAACTCGTGA	22	36	mir-125	dre	HIST&NC
427	miR-376e-5p	GGTGGATATTCCTTCTATGGTT	22	38	mir-368	oar	HIST&NC
428	miR-3107*	CGGGGCAGCTCAGTACAGGA	20	35	mir-486	mmu	HIST&NC
429	miR-4531	AATGGATAAGGCTTCTGA	18	39	undef	hsa	HIST&NC
430	miR-30c-1*	CTGGGAGAGGGTTGTTTACTCC	22	101	mir-30	mmu	HIST&NC
431	miR-10-5p	ACCCTGTAGATCCGAATTTGTGT	23	25	mir-10	dme	HIST&NC
432	miR-29b*	TGGTTTCACATGGTGGCTTAGA	22	25	mir-29	tgu	HIST&NC
433	miR-216a	TAATCTCAGCTGGCAACTGTGA	22	26	mir-216	hsa	HIST&NC
434	miR-320c	AAAAGCTGGGTTGAGAGGG	19	48	mir-320	hsa	HIST&NC
435	miR-3084*	TTGAAGGTTCATTAGCAGAGT	21	96	undef	mmu	HIST&NC
436	miR-301b-3p	CAGTGCAATAGTATTGTCAAAGCAT	25	80	mir-130	gga	HIST&NC
437	miR-1961	TGAGGTAGTAGATTGTAGAAA	21	33	undef	mmu	HIST&NC
438	miR-504*	AGGGAGAGCAGGGCAGGGTTTCT	23	70	mir-504	mmu	HIST&NC
439	miR-378f	ACTGGACTTGGAGGCAGAAG	20	59	undef	hsa	HIST&NC
440	miR-5100	TCGAATCCCAGCGGTGCCTCCA	22	106	undef	mmu	HIST&NC
441	miR-129a	CTTTTTGCGGTTTGGGCTTGC	21	34	mir-129	pma	HIST&NC
442	miR-299	TATGTGGGACGGTAAACCGCTT	22	66	mir-299	ssc mmu	HIST&NC
443	miR-3897-3p	CGGGGTCGGGGGGCGGTGGGG	21	29	undef	tca	HIST&NC
444	miR-101a*	TCAGTTATCACAGTGCTGATGC	22	47	mir-101	mmu	HIST&NC
445	miR-4508	GAAGCGGGGCTGGGCGCGCGC	21	72	undef	hsa	HIST&NC
446	miR-410*	AGGTTGTCTGTGATGAGTTCG	21	22	mir-154	mmu	HIST&NC
447	miR-106a	AAAGTGCTTACAGTGCAGGTAG	22	36	mir-17	cfa	HIST&NC
448	miR-263a	AATGGCACTGAAAGAATTCACGG	23	69	mir-263	bmo aae api	HIST&NC
449	miR-425-5p	ATGACACGATCACTCCCGTTGAGT	24	36	mir-425	bta	HIST&NC
450	miR-101c	ACAGTACTGTGATAACTGA	19	42	undef	mmu	HIST&NC
451	miR-122	TGGAGTGTGACAATGGTGTTTG	22	52	mir-122	gga mmu	HIST&NC
452	miR-155	TTAATGCTAATTGTGATAGGGGT	23	68	mir-155	hsa tgu gga mmu cin	HIST&NC
453	miR-199a-5p	CCCAGTGTTCAGACTACCTGTTC	23	29	mir-199	mmu bta	HIST&NC
454	miR-125	CCCCTGAGACCCTAACTTGTGA	22	27	mir-125	ame	HIST&NC
455	miR-1343	GGGGGACCGCCCCCCGGTCGGC	22	21	undef	oan	HIST&NC
456	miR-511-3p	AATGTGTAGCAAAAGACAGGAT	22	29	mir-506	mmu	HIST&NC
457	miR-2374	TGGGGCTGGCGGCGGGCGGG	20	44	undef	bta	HIST&NC
458	miR-4896	ATTAAATGGATTTTTGGAACTAGGAG	26	41	undef	bfl	HIST&NC
459	miR-3621	CGGGGGTGGGGTCGGCGG	18	20	undef	hsa	HIST&NC
460	let-7g*	CTGTACAGGCCACTGCCTTGC	21	44	let-7	hsa mmu	HIST&NC
461	miR-151b	TCGAGGAGCTCACAGTCT	18	19	undef	hsa	HIST&NC
462	miR-19a	TGTGCAAATCTATGCAAAACTGA	23	33	mir-19	hsa	HIST&NC
463	miR-191*	CTGCACTTGGATTTCGTTCC	20	78	mir-191	mmu oan	HIST&NC
464	miR-7b*	CAACAAGTCACAGCCAGCCTCA	22	20	mir-7	mmu	HIST&NC
465	miR-21*	CAACAGCAGTCGATGGGCTGTC	22	51	mir-21	mmu	HIST&NC
466	miR-199b	CAGTAGTCTGCACATTGGT	19	16	undef	gga	HIST&NC
467	miR-1306	CCACCTCCCCTGCAAACGTCC	21	32	mir-1306	gga cfa	HIST&NC
468	miR-3963	TCGAATCCCACTTCTGACACC	21	53	undef	mmu	HIST&NC
469	let-7i*	CTGCGCAAGCTACTGCCTTGCT	22	37	let-7	mmu	HIST&NC
470	miR-320d	AAAAGCTGGGTTGAGAGG	18	26	mir-320	hsa ptr	HIST&NC
471	miR-188-5p	CATCCCTTGCATGGTGGAGGG	21	19	mir-188	mmu	HIST&NC
472	miR-365-2*	AGGGACTTTCAGGGGCAGCTGTG	23	28	mir-365	mmu	HIST&NC
473	miR-433-5p	TACGGTGAGCCTGTCATTATTCA	23	16	mir-433	oar	HIST&NC
474	miR-344g-5p	AGTCAGGCTCCTGGCAGGAG	20	57	mir-344	mmu	HIST&NC
475	miR-2955	TAGCACTCTGGACTTTGAATC	21	16	undef	tgu	HIST&NC
476	miR-4466	GGGTGGGGTCGGCGGGGG	18	55	undef	hsa	HIST&NC
477	miR-466m-3p	TACATACACACATACACACAGA	22	20	mir-467	mmu	HIST&NC
478	miR-1584	CGGGGTCGGGCTGGAGCGGG	20	35	undef	gga bta	HIST&NC
479	miR-540-5p	CAAGGGTCACCCTCTGACTCTGT	23	25	mir-540	mmu	HIST&NC
480	miR-3082-3p	ACACATGGCGCTCAACTCTGCAG	23	41	undef	mmu	HIST&NC
481	miR-3065-5p	TCAACAAAATCACTGATGCTGGAG	24	29	mir-3065	hsa	HIST&NC
482	miR-378e	ACTGGACTTGGAGTCAGA	18	22	undef	hsa	HIST&NC
483	miR-1271	CTTGGCACCTGGTAAGCACTCA	22	48	mir-1271	ssc cfa eca	HIST&NC
484	miR-4448	GGCTCGTTGGTCTAGGGG	18	30	undef	hsa	HIST&NC
485	miR-361-3p	TCCCCCAGGTGTGATTCTGATT	22	38	mir-361	hsa	HIST&NC
486	miR-26b*	CCTGTTCTCCATTACTTGGCTC	22	26	mir-26	hsa	HIST&NC
487	miR-4443	CTTGGAGGCGTGGGTTAT	18	190	undef	hsa	HIST&NC
488	miR-383*	CCACAGCACTGCCTGGTCAGA	21	29	mir-383	mmu	HIST&NC
489	miR-452-5p	TGTTTGCAGAGGAAACTGAGA	21	19	mir-452	mmu	HIST&NC
490	miR-1982.1	TCTGACCCTATGTCCCCCACAGT	23	37	undef	mmu	HIST&NC
491	miR-144	TACAGTATAGATGATGTACT	20	24	mir-144	ptr mmu gga xtr ppa	HIST&NC
492	miR-26a-1*	CCTATTCTTGGTTACTTGCACG	22	15	mir-26	hsa	HIST&NC
493	miR-2407	CTGGGCGGGATGGGAGGTGG	20	17	undef	bta	HIST&NC
494	miR-544-5p	TCTTGTTAAAAAGCAGATTCT	21	16	mir-544	mmu	HIST&NC
495	miR-151	TAGACTGTGAGCTTCTAGAGGGA	23	25	mir-28	mdo	HIST&NC
496	miR-5106	GGGTCTGTAGCTCAGTTGGTTAGAGC	26	33	undef	mmu	HIST&NC
497	miR-484	TCAGGCTCAGTCCCCTCCCGA	21	41	mir-484	hsa	HIST&NC
498	miR-275-3p	TCAGGTACCTGTAGTAGCGCGC	22	14	mir-275	dme	HIST
499	miR-4492	CGGGGCTGGGCGCGCGCCGCG	21	28	undef	hsa	HIST&NC
500	miR-337-3p	TTCAGCTCCTATATGATGCCT	21	39	mir-337	hsa mmu	HIST&NC
501	miR-2230*	AGGCTGTGACTGTGGAGC	18	13	undef	crm	HIST&NC
502	miR-219-3p*	AGAGTTGCGTCTGGACGTCCCGT	23	41	mir-219	mmu	HIST&NC
503	miR-101*	CAGTTATCACAGTGCTGATGC	21	23	mir-101	hsa	HIST&NC
504	miR-135a-2*	TGTAGGGATGGAAGCCATGAA	21	13	mir-135	mmu	HIST&NC
505	miR-1264-5p	AGGTCCTCAGTAAGTATTTGTT	22	19	mir-95	mmu	HIST&NC
506	miR-1322	AGGATGCTGCTGATGCTG	18	14	mir-1322	hsa	HIST&NC
507	miR-211	TTCCCTTTGTCATCCTTTGCCT	22	20	mir-204	mmu bta	HIST&NC
508	miR-4532	CGCTCCCGGGGAGCCCGGCGG	21	11	undef	hsa	HIST&NC
509	miR-5128	CTTTGAGGGCTGGAGAGATGGCT	23	25	undef	mmu	HIST&NC
510	miR-3141	GAGGGCTGGGTGGAAGAGGGT	21	29	undef	hsa	HIST&NC
511	miR-1261	GGGATAAGGATTGGCTCT	18	76	mir-1261	hsa ppy eca	HIST&NC
512	miR-31*	TGCTATGCCAACATATTGCCATC	23	20	mir-31	hsa mmu	HIST&NC
513	miR-199a*	CAGTAGTCTGCACATTGGTTA	21	24	mir-199	ssc	HIST&NC
514	miR-3093-3p	TGTGGACACCGTGGGAGGTTGT	22	45	undef	mmu	HIST&NC
515	miR-496-3p	TGAGTATTACATGGCCAATCT	21	10	mir-154	oar	HIST&NC
516	miR-15b*	CGAATCATTATTTGCTGCTCT	21	21	mir-15	mmu	HIST&NC
517	miR-5105	CCGGCGCCGCTCGTGGGGGGC	21	19	undef	mmu	HIST&NC
518	miR-1843	ACATGGAGGTCTCTGTCTGACTT	23	27	mir-1843	cfa	HIST&NC
519	miR-1709	TGGAGATGATGAACTGACT	19	12	undef	gga	HIST&NC
520	miR-450a-1*	ATTGGGAACATTTTGCATAAAT	22	15	mir-450	mmu	HIST&NC
521	miR-20a-2*	ACTGCATTACGAGCACTTACAGT	23	10	mir-17	oan	HIST&NC
522	miR-5126	CGCGGGCGGGGCCGGGGGTGG	21	88	undef	mmu	HIST&NC
523	miR-3070a	TGGTGATACCGTCAGGGGTAGA	22	28	mir-3070	mmu	HIST&NC
524	miR-455-3p	ATGCAGTCCACGGGCATATACAC	23	19	mir-455	gga	HIST&NC
525	miR-3059*	CCTCTAGGGAAGAGAAGGTTGG	22	24	undef	mmu	HIST&NC
526	miR-7d	TGGAAGACTAGTAATTTTGTTGT	23	13	undef	sme	HIST&NC
527	miR-2392	AGGCTGGGAGTGAGAGGT	18	13	undef	hsa	HIST&NC
528	miR-3072	TGCCCCCTCCAGGAAGCCTTCT	22	15	undef	mmu	HIST&NC
529	miR-1264-3p	CAAATCTTATTTGAGCACCTGTAG	24	21	mir-95	mmu	HIST&NC
530	miR-188	CATCCCTTGCATGGTGGAGGGC	22	22	mir-188	mml	HIST&NC
531	miR-1419d*	ATGTCATCGTCACAGCCCATG	21	9	mir-1419	oan	HIST&NC	Low expression
532	miR-3102-3p.2	CTCTACTCCCTGCCCCAGCCAT	22	31	undef	mmu	HIST&NC
533	miR-758*	TGGTTGACCAGAGAGCACACG	21	11	mir-379	mmu	HIST&NC
534	miR-1587	TTGGGCTGGGCAGTGGTGGCGG	22	22	undef	hsa gga	HIST&NC
535	miR-142b	CATAAAGTAGAAAGCACTACTA	22	15	mir-142	fru	HIST&NC
536	miR-27d	TTCACAGTGGCTAAGTTCTTT	21	28	mir-27	dre	HIST&NC
537	miR-1224*	CCCCACCTCTTCTCTCCTCAGT	22	18	mir-1224	mmu	HIST&NC
538	miR-676*	CTCTGCAACCTTAGGACTTGC	21	12	mir-676	mmu	HIST&NC
539	miR-1247	ACCCGTCCCGTTCGTCCCCGGA	22	11	mir-1247	mmu	HIST&NC
540	miR-2288	AGGTAGTAGGTTGTGTGGTTT	21	27	undef	bta	HIST&NC
541	miR-27c	TTCACAGTGGCTAAGTTCCAC	21	50	mir-27	xtr dre	HIST&NC
542	miR-1251	ACTCTAGCTGCCAAAGGCGCT	21	20	mir-1251	hsa	HIST&NC
543	miR-1354	TCATGGTGATATGTGGCTGTAG	22	11	undef	gga	HIST&NC
544	miR-3064-5p	TCTGGCTGTTGTGGTGTGC	19	21	mir-3064	hsa mmu	HIST&NC
545	miR-71	TGAAGAGACATGAGAGTGTAGAAT	24	12	mir-71	cbr spu	HIST&NC
546	miR-3096b-3p	AATAGGATTACGCTGAGGCCC	21	22	mir-3096	mmu	HIST&NC
547	miR-4028-3p	CTGATGATGTGTTGTTGC	18	14	undef	cin	HIST&NC
548	miR-1369	TGGGCTGGGGTGGGAGGAGG	20	21	undef	oan	HIST&NC
549	miR-1260b	ATCCCACCGCTGCCACCAA	19	69	undef	hsa	HIST&NC
550	miR-2981	GCGGGCGGGCGGGCTGGAG	19	70	undef	tgu	HIST&NC
551	miR-92c	TATTGCACTCGTCCCGGCCTCTAT	24	29	mir-25	cte sko cin oan	HIST&NC
552	miR-320b	AAAAGCTGGGTTGAGAGGGCAT	22	68	mir-320	hsa	HIST&NC
553	miR-199b*	CCCAGTGTTTAGACTACCTGTTC	23	9	mir-199	mmu	HIST&NC	Low expression
554	miR-495*	GAAGTTGCCCATGTTATTTTTCG	23	13	mir-329	mmu	HIST&NC
555	miR-296-3p	AGGGTTGGGTGGAGGCTCTCC	21	24	mir-296	mmu	HIST&NC
556	let-7h	TGAGGTAGTAAGTTGTGTTGT	21	18	let-7	dre	HIST&NC
557	miR-4450	TGGGGATTGGGAGAGGTGGG	20	10	undef	hsa	HIST&NC
558	miR-4451	TGGTAGAGCGGAGGACTGTA	20	29	undef	hsa	HIST&NC
559	miR-29d	TAGCACCATATGAAATCGGTT	21	16	mir-29	xtr pma bta	HIST&NC
560	miR-551	GCGACCCATACTTGGTTTCAGA	22	10	mir-551	pma	HIST&NC
561	miR-190*	CTATATATCAAGCATATTCCT	21	16	mir-190	mmu	HIST&NC
562	miR-214*	TGCCTGTCTACACTTGCTGTGC	22	7	mir-214	hsa	HIST	Low expression
563	miR-3065	TCAACAAAATCACTGATGCTGG	22	8	mir-3065	mmu	HIST&NC	Low expression
564	miR-92a-1*	AGGTTGGGATTTGTCGCAATGCT	23	11	mir-25	mmu	HIST&NC
565	miR-4020a-5p	TTGGTTAGAGCTTGGTGC	18	7	undef	cin	HIST&NC	Low expression
566	miR-582	ATACAGTTGTTCAACCAGTTACA	23	20	mir-582	ptr	HIST&NC
567	miR-301b	CAGTGCAATGGTATTGTCAAAGC	23	9	mir-130	mmu	HIST&NC	Low expression
568	miR-22a	AAGCTGCCAGCTGAAGAACTGT	22	8	mir-22	dre pma	HIST&NC	Low expression
569	miR-3065*	TCAGCACCAGGATATTGTTGGG	22	16	mir-3065	mmu	HIST&NC
570	miR-365-1*	AGGGACTTTTGGGGGCAGATGTGT	24	27	mir-365	mmu	HIST&NC
571	miR-103a-2*	AGCTTCTTTACAGTGCTGCCTTG	23	12	mir-103	hsa	HIST&NC
572	miR-362-3p	AACACACCTGTTCAAGGATTCA	22	16	mir-362	mmu	HIST&NC
573	miR-2885	CGGCGGCGGCGACTCTGGGCG	21	9	undef	bta	HIST&NC	Low expression
574	miR-669k*	TGTGATGTGTGTATGTATATGTGA	24	17	mir-467	mmu	HIST&NC
575	miR-4057-5p	CGGCTTGGTGACTCTAGATA	20	13	undef	cin	HIST&NC
576	miR-263b	ATGGCACTGGTAGAATTCACAGA	23	32	mir-263	nvi aae dpu api	HIST&NC
577	miR-449a	TGGCAGTGTATTGTTAGCTGGT	22	13	mir-449	hsa	HIST&NC
578	miR-33a*	CAATGTTTCCACAGTGCATCAA	22	14	mir-33	hsa	HIST&NC
579	miR-363	AATTGCACGGTATCCATCTGTA	22	15	mir-363	hsa cfa	HIST&NC
580	miR-193	AACTGGCCTACAAAGTCCCAGT	22	15	mir-193	mmu mdo	HIST&NC
581	let-7a-2*	CTGTACAGCCTCCTAGCTTTCC	22	12	let-7	hsa mmu	HIST&NC
582	miR-3917	CTCGGACTGAGCAGGTGGG	19	26	undef	hsa	HIST&NC
583	miR-1306-5p	CCACCTCCCCTGCAAACGTCCA	22	12	mir-1306	ssc	HIST&NC
584	miR-4836*	AAAGGTTTGGTCCTGGAA	18	14	undef	sko	HIST&NC
585	miR-1251*	CGCTTTGCTCAGCCAGTGTAG	21	12	mir-1251	mmu	HIST
586	miR-4634	CGCCGCGACCGGCTCCGGGACG	22	7	undef	hsa	HIST&NC	Low expression
587	miR-1692	GGATAGCTCAGTCGGTAGAG	20	34	undef	gga	HIST&NC
588	miR-16c	TAGCAGCATGTAAATATTGG	20	8	mir-15	dre xtr	HIST&NC	Low expression
589	miR-3470b	TGGAACTCATGTAGACCAGGCTGGC	25	57	mir-3470	mmu	HIST&NC
590	miR-410-5p	CAACACTGGGTACTTGAGGAG	21	5	mir-154	oar	HIST&NC	Low expression
591	miR-544-3p	ATTCTGCATTTTTAGCAAGCTT	22	5	mir-544	mmu	HIST&NC	Low expression
592	miR-3075	TGTCTGGGAGCAGCCAAGGACA	22	12	undef	mmu	HIST&NC
593	lin-4	TCCCTGAGACCTCAACTTGTG	21	7	undef	ppc	HIST&NC	Low expression
594	miR-34b-5p	AGGCAGTGTAATTAGCTGATTGT	23	7	mir-34	mmu	HIST&NC	Low expression
595	miR-4020b-5p	TTGGTTGGTTGGTTGGTT	18	8	undef	cin	HIST&NC	Low expression
596	miR-300*	TTGAAGAGAGGTTATCCTTTGT	22	24	mir-154	mmu	HIST&NC
597	miR-4286	AACCCCACTCCTGGTACCA	19	13	undef	hsa	HIST&NC
598	miR-285-3p	TAGCACCATTTGAAATCAGGGAACC	25	15	mir-29	dme	HIST&NC
599	miR-4791	TGGATATGATGACTGATT	18	31	undef	hsa	HIST&NC
600	miR-137b	TTATTGCTTGAGAATACGCGTAG	23	12	mir-137	oan	HIST&NC
601	miR-4505	TAGGGTCGGGCTGGGACGGG	20	36	undef	hsa	HIST&NC
602	miR-1912	CAGAACATGCAGTGAGAACTTGA	23	8	mir-1912	mmu	HIST&NC	Low expression
603	miR-1276	TAACGAGACTGTGGAAGACA	20	7	mir-1276	hsa	HIST&NC	Low expression
604	miR-146c	TGAGAACTGAATTCCATAGACTG	23	16	mir-146	gga	HIST&NC
605	miR-3096b-5p	TGGCCAAGGATGAGAACTCTAACC	24	14	mir-3096	mmu	HIST&NC
606	miR-107b	AGCAGCATTGTACAGGGCTTTG	22	10	mir-103	dre	HIST&NC
607	miR-2449	TGGGACGAGACAGAGGGG	18	6	undef	bta	HIST&NC	Low expression
608	miR-341*	CGGTCGGCCGATCGCTCGGTC	21	6	mir-341	mmu	HIST&NC	Low expression
609	miR-5102	CGCTTCTGGCGCCAAGCGCCCGTCCG	26	16	undef	mmu	HIST&NC
610	miR-574-5p	TGAGTGTGTGTGTGTGAGTGTGTG	24	31	mir-574	hsa	HIST&NC
611	miR-4770	TGAGATGACACTGTAGCT	18	16	undef	hsa	HIST&NC
612	miR-362-5p	AATCCTTGGAACCTAGGTGTGA	22	9	mir-362	hsa mmu	HIST&NC	Low expression
613	miR-1790	TCGGGGGGGCGGTGGGGCA	19	14	undef	gga	HIST&NC
614	miR-877*	TGTCCTCTTCTCCCTCCTCCCAT	23	26	mir-877	hsa mmu	HIST&NC
615	miR-4107-5p	ATTATCTCAATTGATTGTTCA	21	8	undef	cin	HIST&NC	Low expression
616	miR-34b	CAGGCAGTGTAGTTAGCTGATTGC	24	11	mir-34	hsa gga dre bta	HIST&NC
617	miR-33-5p	GTGCATTGTAGTTGCATTGCAG	22	9	mir-33	tca	HIST&NC	Low expression
618	miR-2137	AGAAGCCGGCGGGAGCCCCGGGGAG	25	7	undef	mmu	HIST&NC	Low expression
619	miR-539-5p	AATTATCCTTGGTGTGTT	18	7	mir-154	oar	HIST&NC	Low expression
620	miR-1474	TTGTCGGATGAGTTGTGCTT	20	4	undef	odi	HIST&NC	Low expression
621	miR-125*	ACGGGTTAGGTTCTTGGGAGT	21	15	mir-125	pma oan	HIST&NC
622	miR-344b	TAGCCAAAGCCTGACTGT	18	4	undef	mmu	HIST&NC	Low expression
623	miR-4599a	CAGCGCTCGCCGAATCCCG	19	4	mir-4599	pma	HIST	Low expression
624	miR-17*	ACTGCAGTGAAGGCACTTGTG	21	4	mir-17	hsa	HIST&NC	Low expression
625	miR-2966	ACGGGCGCGGGACGGGACGGG	21	13	undef	tgu	HIST&NC
626	miR-4488	AGAGGTCGCGGGCTCCGGC	19	5	undef	hsa	HIST&NC	Low expression
627	miR-3119	GGTTTCAACTTTGAGGGC	18	6	mir-3119	hsa	HIST&NC	Low expression
628	miR-2354	TAGTAGGTTGTGTGGTTA	18	17	undef	bta	HIST&NC
629	miR-2812	CGGCTGTAATAGTGAGGC	18	12	undef	bmo	HIST&NC
630	miR-1678	TCTGACAACGACAGAAGAGC	20	4	undef	gga	HIST&NC	Low expression
631	miR-196	TAGGTAGTTTCATGTTGTTGG	21	4	mir-196	gga	HIST&NC	Low expression
632	miR-1777b	GGGGTCGGGGGGGCGGTGG	19	24	undef	bta	HIST&NC
633	miR-1599	AGGGAGTAGAAAAAAAAA	18	41	undef	gga	HIST&NC
634	miR-17-3p	ACTGCAGTGAAGGCACTTGT	20	4	mir-17	gga	HIST&NC	Low expression
635	miR-130b*	ACTCTTTCCCTGTTGCACTAC	21	8	mir-130	hsa mmu	HIST&NC	Low expression
636	miR-4792	CGGTGAGCTCTCGCTGGC	18	11	undef	hsa	HIST&NC
637	miR-30f	TGTAAACACCCTACACTCTCAGC	23	8	mir-30	pma bta	HIST&NC	Low expression
638	miR-275	TCAGGTACCTGTAGTAGCGC	20	7	mir-275	aae api	HIST	Low expression
639	miR-718	GGTCCCCCCGCCGGGCGTCGG	21	8	mir-718	hsa	HIST&NC	Low expression
640	miR-339b	TCCCTGTCCTCCAGGAGCTC	20	10	undef	bta	HIST&NC
641	miR-491	CATGCAAGATTCCCATTCTT	20	5	mir-491	cfa	HIST&NC	Low expression
642	miR-3072*	AGGGACCCCGAGGGAGGGCAGG	22	5	undef	mmu	HIST&NC	Low expression
643	miR-2887	TCGGGACCGGGGTCCGGTGCGGAGA	25	34	mir-2887	bta	HIST&NC
644	miR-466h-3p	TACACACATGCACACACACGC	21	4	mir-467	mmu	HIST	Low expression
645	miR-216b	AAATCTCTGCAGGCAAATGTG	21	14	mir-216	tgu mmu pma	HIST&NC
646	miR-328*	GGGGGGCAGGAGGGGCTCAGGG	22	9	mir-328	mmu	HIST&NC	Low expression
647	miR-448-5p	GAACATCCTGCATAGTGCTGCC	22	12	mir-448	mmu	HIST&NC
648	miR-709	AAGGAGGCAGAGGCAGGAGGA	21	58	undef	mmu	HIST&NC
649	miR-2964a-3p	AGAATTGCGTTTGGACAATCAGT	23	6	mir-2964	hsa	HIST&NC	Low expression
650	miR-669m-5p	TGTGTGTATGTTATGTGTGTATG	23	6	mir-467	mmu	HIST&NC	Low expression
651	miR-1225-5p	GTGGGTACGGCCCAGTGGGA	20	5	mir-1225	mml	HIST&NC	Low expression
652	miR-1408	AGGGGAGGAGGGTGGCTGT	19	21	undef	oan	HIST&NC
653	miR-802	TCAGTAACAAAGATTCATCCTT	22	5	mir-802	hsa mmu	HIST&NC	Low expression
654	miR-1249*	AGGAGGGAGGGGATGGGCCAAGTTC	25	9	mir-1249	mmu	HIST	Low expression
655	miR-30d-3p	TTTCAGTCAGATGTTTGCTGTA	22	8	mir-30	tgu	HIST&NC	Low expression
656	miR-669c*	CACACACACACACACAGAGAGA	22	4	mir-467	mmu	HIST	Low expression
657	miR-670	TCCTTTAGTATAGTGGTGAGA	21	3	mir-670	bta	HIST	Low expression
658	miR-100*	CAAGCTCGTGTCTGTGGGTCT	21	9	mir-99	hsa mmu bfl oan	HIST&NC	Low expression
659	miR-4-3p	ATAAAGTAGAACCATTGA	18	4	mir-4	dme	HIST&NC	Low expression
660	miR-548am	AGAAACTGCAGTTCTTTTG	19	5	mir-548	hsa	HIST&NC	Low expression
661	miR-15a*	CAGGCCATATTGTGCTGCCTCA	22	9	mir-15	hsa	HIST&NC	Low expression
662	miR-3207	GTGTGAGTGACGGTAGGGG	19	3	undef	bmo	HIST&NC	Low expression
663	miR-666-5p	AGCGGGCACGGCTGTGAGAGCAAT	24	16	mir-666	mmu	HIST&NC
664	miR-1767	AGGCGAGGGAACAGAAGC	18	4	undef	gga	HIST&NC	Low expression
665	miR-3960	GCGCGGGCCGGAGCGGGGG	19	19	mir-3960	mmu	HIST&NC
666	miR-2305	CGTGGGGTGGCGGAAAGGGG	20	16	undef	bta	HIST&NC
667	miR-182*	TGGTTCTAGACTTGCCAACT	20	7	mir-182	hsa mmu	HIST	Low expression
668	miR-883b-3p	TAACTGCAACATCTCTCAGTAT	22	3	mir-883	mmu	HIST	Low expression
669	miR-4499	AGAGACATGAGAGGAGTAGA	20	15	undef	hsa	HIST&NC
670	miR-142*	AGTGTTTCCTACTTTATGGATG	22	8	mir-142	bta	HIST&NC	Low expression
671	miR-604	AGGCTGTGCGGAATTCGGACC	21	8	mir-604	hsa ptr mml	HIST&NC	Low expression
672	miR-196a	TAGGTAGTTTCATGTTGTTGGG	22	7	mir-196	hsa	HIST&NC	Low expression
673	miR-9c-5p	TCTTTGGTTATTCAGCTGTA	20	12	mir-9	dme	HIST&NC
674	miR-2834	TCATTCAGGACTAGAGAC	18	3	mir-2834	bmo	HIST&NC	Low expression
675	miR-365-5p	GAGGGACTTTCAGGGGCAGCTGTT	24	16	mir-365	ssc	HIST&NC
676	miR-4171-5p	TGACTCTCTTAAGGTAGC	18	3	undef	cin	HIST&NC	Low expression
677	miR-1280	TCCCACCGCTGCCACCAAA	19	4	mir-1280	hsa	HIST&NC	Low expression
678	miR-297c	TGTATGTCTGTATGTACATGTG	22	5	mir-467	mmu	HIST&NC	Low expression
679	bantam	TGAGATCATTGTGAAAGCTGATT	23	8	bantam	cte ame	HIST&NC	Low expression
680	miR-1386	CGACTCCTGGCTGGCTCGCC	20	16	undef	oan	HIST&NC
681	miR-598*	GCGGTGATGCCGATGGTGCGAGC	23	5	mir-598	mmu	HIST&NC	Low expression
682	miR-3100-5p	TTGGGAACGGGGTGTCTCTGGG	22	6	undef	mmu	HIST&NC	Low expression
683	miR-154b-3p	ATAATACATGGTTGATCTTTTT	22	4	mir-154	oar	HIST&NC	Low expression
684	miR-4429	AAAAGCAGGGCTGAAGGA	18	8	undef	hsa	HIST&NC	Low expression
685	miR-344d-3*	AGTCAGGCTACTGGTTATATTCCA	24	4	mir-344	mmu	HIST&NC	Low expression
686	miR-514	ATTAGGACACTTTTATGCAGTAG	23	3	mir-506	age	HIST	Low expression
687	miR-4444	TGAACTCGAGTTGGAAGAGGCG	22	3	undef	hsa	HIST	Low expression
688	miR-20a*	ACTGCATTACGAGCACTTACAG	22	3	mir-17	mmu	HIST&NC	Low expression
689	miR-4484	AAGAGGCGGGAGAACACCA	19	5	undef	hsa	HIST&NC	Low expression
690	miR-1718	ACCAAGGACAGGGAAGAG	18	7	undef	gga	HIST&NC	Low expression
691	miR-501-3p	AATGCACCCGGGCAAGGATTTG	22	7	mir-500	hsa mmu	HIST&NC	Low expression
692	miR-2048	ACATCTGAAACAATAACGC	19	3	undef	nve	HIST	Low expression
693	miR-2861	GGGGCCGGCGGCGGCGGCGA	20	10	mir-2861	mmu	HIST&NC
694	miR-130d	CAGTGCAATGTTAAAAAGGGCA	22	6	mir-130	pma	HIST	Low expression
695	miR-216	TAATCTCAGCTGGCAACTGTG	21	5	mir-216	gga bfl	HIST&NC	Low expression
696	miR-3607-3p	ATGATACTGTAAACGCTTTCTGATG	25	6	undef	hsa	HIST&NC	Low expression
697	miR-2136	CGGGTGTTGACGCGATGTGA	20	5	undef	mmu	HIST&NC	Low expression
698	miR-146	TGAGAACTGAATTCCATAGGTT	22	3	mir-146	xtr	HIST&NC	Low expression
699	miR-30c*	TTTCAGTCGGATGTTTGCAGTAT	23	4	mir-30	pma	HIST&NC	Low expression
700	miR-501-5p	AATCCTTTGTCCCTGGGTGAAAATGC	26	4	mir-500	mmu	HIST&NC	Low expression
701	miR-329a	AGAGGTTTTCTGGGTTTCTGTT	22	3	mir-329	cfa	HIST	Low expression
702	let-7j	TGAGGTAGTTGTTTGTACAGTT	22	13	let-7	fru cfa dre	HIST&NC
703	miR-1299	GTGTGGATTCTGTGGAGGG	19	4	mir-1299	ptr	HIST&NC	Low expression
704	miR-1721	CAGAGAGATCGTTGATTCTGAGA	23	4	undef	bta	HIST&NC	Low expression
705	miR-4130-3p	CAGAAGGCTGCGTGTTCGAA	20	3	undef	cin	HIST&NC	Low expression
706	miR-1b	TGGAATGTTAAGAAGTATGTAA	22	5	mir-1	gga	HIST&NC	Low expression
707	miR-1346	GGGGGTGGGGTCGGCGGGGG	20	10	undef	oan	HIST&NC
708	miR-16-2*	CCAATATTATTGTGCTGCTTTA	22	6	mir-15	hsa mmu	HIST&NC	Low expression
709	miR-3885-5p	CCGGCGGCGGCGGCGGCTCTG	21	5	undef	tca	HIST&NC	Low expression
710	miR-2917	ATGACTGGCATGGAACGT	18	3	undef	bta	HIST&NC	Low expression
711	miR-3106	TGGCTCATTTAGAAGCAGCAGA	22	11	undef	mmu	HIST&NC
712	miR-1653	CGGAGCTGTTGCTGCTGCAGAG	22	5	undef	gga	HIST&NC	Low expression
713	miR-2993	CAGCGCTGTGGAGCAGGAGG	20	27	undef	tgu	HIST&NC
714	miR-2218b*	CAAATTCTGTAGTTTGTAGATGGCA	25	6	undef	cel	HIST&NC	Low expression
715	miR-4742-3p	TCAGTGTTCTCTTTCCTGCAG	21	3	undef	hsa	HIST&NC	Low expression
716	miR-4459	CCAGGAGGCTGAGGCAGGAGGG	22	5	undef	hsa	HIST&NC	Low expression
717	miR-4186-5p	CTGGATGAGGAAGACTGA	18	4	undef	cin	HIST&NC	Low expression
718	miR-679-5p	GAACTGTGAGGTGACTCTTGGT	22	5	undef	mmu	HIST&NC	Low expression
719	miR-34b*	TAGGCAGTGTAATTAGCTGATT	22	6	mir-34	hsa	HIST&NC	Low expression
720	miR-920	AGGGAGTGTGGAAGGAGA	18	10	mir-920	hsa ppy mml	HIST&NC
721	miR-466f-3p	TACACACACACACATACACAC	21	6	mir-467	mmu	HIST&NC	Low expression
722	miR-1357	ATATGAGACTGTAGGGAC	18	13	undef	oan	HIST&NC
723	miR-1575	CGGCAGACAGTAGAGCAGG	19	3	undef	gga	HIST&NC	Low expression
724	miR-664-3p	TATTCATTTATCCCCCAGCCTAC	23	22	mir-664	ssc	HIST&NC
725	miR-4546	ACACATGCAAGTCGAGCGGGGAAGG	25	4	undef	pma	HIST	Low expression
726	miR-2455	TTGGGCTCGGGGAGGCAGCGGG	22	2	undef	bta	HIST	Low expression
727	miR-1345	GCCGGGGAGCAGGCGAGGTG	20	2	undef	oan	HIST&NC	Low expression
728	miR-92d	TATTGCGCTTGTCCCGGCCTGT	22	2	mir-25	oan	HIST	Low expression
729	miR-344f-5p	AAGTCAGGCTCCTGGCTGGAGTC	23	6	mir-344	mmu	HIST&NC	Low expression
730	miR-292-5p	ACTCAAACTGGGGGCTCTTTT	21	2	mir-290	mmu	HIST&NC	Low expression
731	miR-3223	TTCCTTTACCTTCTACCCCAGA	22	2	undef	bmo	HIST	Low expression
732	miR-2159-5p	TGCTTTTCTGTTGGTGGC	18	2	undef	sme	HIST&NC	Low expression
733	miR-4128-3p	TTTAGAGGTAGAACTGAATA	20	4	undef	cin	HIST&NC	Low expression
734	miR-130a*	GCTCTTTTCACATTGTGCTACT	22	2	mir-130	mmu	HIST	Low expression
735	miR-18b	TAAGGTGCATCTAGTGCTGTTAG	23	4	mir-17	mmu	HIST&NC	Low expression
736	miR-1407	AGGAGCTGCCTGGGAAGA	18	9	undef	oan	HIST&NC	Low expression
737	miR-222b	AGCTACATCTGGCTACTGGGTACA	24	3	mir-221	oan	HIST&NC	Low expression
738	miR-19b-1*	AGTTTTGCAGGTTTGCATCCAGC	23	2	mir-19	hsa	HIST&NC	Low expression
739	miR-3653	AAGAAGTTAGACTGAAGG	18	4	undef	hsa	HIST&NC	Low expression
740	miR-377*	AGAGGTTGCCCTTGGTGAATTCT	23	5	mir-154	hsa	HIST&NC	Low expression
741	miR-1614	GGCATGGAACTCACTCTGT	19	2	undef	gga	HIST	Low expression
742	miR-350*	AAAGTGCACGTGCTTTGGGAC	21	2	mir-350	mmu	HIST&NC	Low expression
743	miR-449d	AAGGATGGGTCTGTGGAG	18	9	undef	bta	HIST&NC	Low expression
744	miR-1670	GGGGACGTAGCTCAGTGG	18	2	undef	gga	HIST&NC	Low expression
745	miR-4048-3p	GCTGACTGGAGAGAGGTG	18	5	undef	cin	HIST&NC	Low expression
746	miR-607	TTATAGATCTGGATTTTGAACC	22	4	mir-607	mml	HIST&NC	Low expression
747	miR-2772b	CAGTTTGGTTCTGATCTGGA	20	2	mir-2772	bmo	HIST&NC	Low expression
748	miR-2015*	TACTTGATTGTGGAGGAGAGA	21	3	undef	aqu	HIST	Low expression
749	miR-3195	CACCGCCGCGGCCCGGGTT	19	13	undef	hsa	HIST&NC
750	miR-3084	TTCTGCCAGTCCCCTTCAGT	20	6	undef	mmu	HIST&NC	Low expression
751	miR-4727-3p	ATAGGGAACTGGCAGATAC	19	2	undef	hsa	HIST	Low expression
752	miR-463*	TACCTAATTTGTTGTCCATCATG	23	2	mir-463	mmu	HIST	Low expression
753	miR-182-3p	GTGGACGTGTATTTTGAGAC	20	2	undef	cin	HIST	Low expression
754	miR-326*	GGGGGCAGGGCCTTTGTGAAGGCG	24	6	mir-326	mmu	HIST&NC	Low expression
755	miR-3170	GTGGGTTCTGAGACAGAAGT	20	2	undef	hsa	HIST	Low expression
756	miR-279d-5p	TGGGGATTGTGGGTTCGAGTCCC	23	2	mir-279	tca	HIST&NC	Low expression
757	miR-2851	ATGTGCTGACTGTATCTACAGAAGA	25	4	mir-2851	bmo	HIST&NC	Low expression
758	miR-4806-3p	ATGGCTCAGCTGGTAAAGC	19	4	undef	cel	HIST	Low expression
759	miR-4419b	TGGACGACTGAAGGAAGATGG	21	15	undef	hsa	HIST&NC
760	miR-246*	TTGAGATGTTCGGGTAGGAG	20	2	mir-246	crm	HIST	Low expression
761	miR-4004-5p	TGAGCTTTGTCTGTATTGTGGC	22	3	undef	cin	HIST&NC	Low expression
762	miR-666-3p	GGCTGCAGCGTGATCGCCTGC	21	4	mir-666	mmu	HIST&NC	Low expression
763	miR-3254	GCGGACGAATGCAGAAGAG	19	3	undef	bmo	HIST&NC	Low expression
764	miR-2416	TGCTGTGCACTGTGGGAGATG	21	2	undef	bta	HIST	Low expression
765	miR-1384	GTGCAATTTTTGGAAAAA	18	4	undef	oan	HIST&NC	Low expression
766	miR-1412	CTGGGAGAGGAGGGTCGGG	19	8	undef	oan	HIST&NC	Low expression
767	miR-694	CTGAAAATGGATTGCGCTGGAG	22	4	undef	mmu	HIST&NC	Low expression
768	miR-2817	ACAAATGCGTAGACTGAG	18	3	undef	bmo	HIST&NC	Low expression
769	miR-5116	CTTTGATAGGAAACCTGCCTGA	22	2	undef	mmu	HIST	Low expression
770	let-7f-5p	TGAGGTAGTGGATTGTAT	18	4	undef	cin	HIST&NC	Low expression
771	miR-2951	AAGAGCTCAGCACGCAGGGGTGGCG	25	4	undef	cqu	HIST&NC	Low expression
772	miR-466k	TGTGATGTGTGCATGTACATGTGT	24	3	mir-297	mmu	HIST&NC	Low expression
773	miR-2986	AGGACACCAGAGACTTCAGT	20	2	undef	tgu	HIST	Low expression
774	miR-376a-5p	TAGATTCTCCTTCTATGAGTAC	22	7	mir-368	oar	HIST&NC	Low expression
775	miR-567	AGTAGAGTTCTTCAGGCACAGACC	24	2	mir-567	hsa	HIST	Low expression
776	miR-5122	ACGCGGGACGGGGCTCTG	18	2	undef	mmu	HIST&NC	Low expression
777	miR-669f-5p	TGTTGTGTGTATGTGTATGTGT	22	3	mir-467	mmu	HIST&NC	Low expression
778	miR-762	GGGCGCCGGGGCCGGGGGCGGC	22	3	mir-762	hsa gga	HIST&NC	Low expression
779	miR-4166-5p	CGAGGACAATATATTAAATGGA	22	3	undef	cin	HIST&NC	Low expression
780	miR-330-3p	CAAAGCACACGGCCTGCAGAGAGG	24	4	mir-330	hsa	HIST&NC	Low expression
781	miR-4430	ACGGCTTGGAGCTGAGCGGA	20	9	undef	hsa	HIST&NC	Low expression
782	miR-4175-3p	GGGATGTAGCTCAGTGGTAG	20	5	undef	cin	HIST&NC	Low expression
783	miR-3767	TCCAGATTATTTACTATAC	19	2	undef	ame	HIST	Low expression
784	miR-3828-5p	TCTTAAGTGCAGGAGTAGAC	20	3	undef	tca	HIST&NC	Low expression
785	miR-2425	CAGGCCATGGTCCATGAACT	20	2	undef	bta	HIST	Low expression
786	miR-749	GGGGATGTAGCTCGGTGGT	19	2	undef	sme	HIST&NC	Low expression
787	miR-2243	TGATGATGTTTCTTTGGAT	19	2	undef	ppc	HIST	Low expression
788	miR-22b	AAGCTGCCAGTTGAAGAGCTGT	22	2	mir-22	dre	HIST	Low expression
789	miR-1248	ACCTTCTTGTATAAGCACTGTG	22	2	mir-1248	hsa	HIST	Low expression
790	miR-2238b	AATGACAAATCGACTGGGGA	20	2	mir-2238	ppc	HIST	Low expression
791	miR-24*	TGCCTACTGAGCTGATATCA	20	4	mir-24	ssc oan	HIST&NC	Low expression
792	miR-509a	TGATTGTCACTCTGCAGGAGC	21	3	mir-506	age	HIST&NC	Low expression
793	miR-344e	GATATAACCAAAGCCTGACTGT	22	3	mir-344	mmu	HIST&NC	Low expression
794	miR-3120-3p	CACAGCAAGTGTAGACAGGCAT	22	8	mir-214	hsa	HIST&NC	Low expression
795	miR-182c	TTTGGCATTGTGAATTTTTTC	21	2	undef	bfl	HIST	Low expression
796	miR-8-5p	CATCTTATCGGGCAGCATTGGA	22	5	mir-8	dme	HIST	Low expression
797	miR-200	TAATACTGCCTGGTAATGGTG	21	5	mir-200	cin	HIST&NC	Low expression
798	miR-4740-5p	AGGTACTGATCTCTGGGCACG	21	4	undef	hsa	HIST&NC	Low expression
799	miR-1654	TTGCTGGTGTGGGATGAG	18	2	mir-1654	gga	HIST	Low expression
800	miR-3652	TGGCTGGAGGAGTAGGAGGA	20	9	undef	hsa	HIST&NC	Low expression
801	miR-1663	TGGATCCAGAACAGATGTC	19	2	undef	gga	HIST&NC	Low expression
802	miR-3470a	TCACTGTGGAGACCAGGCTGGC	22	15	mir-3470	mmu	HIST&NC
803	miR-302a	TCAGTGTTCCATGTTTGTA	19	2	mir-302	mdo	HIST	Low expression
804	miR-3074-5p	TGTTCCTGCTGAACTGAGCCAGA	23	8	mir-3074	hsa mmu	HIST&NC	Low expression
805	miR-2904	CGAAGGAGCCTCGGTTGGCCC	21	2	mir-2904	bta	HIST	Low expression
806	miR-276a-3p	TAGGAACTTCATACCGTGCTCT	22	3	mir-276	dme	HIST&NC	Low expression
807	miR-3665	AGCGCGACTGCGGGGCGGCG	20	2	undef	hsa	HIST&NC	Low expression
808	miR-2946	TAGGACGGAAAAGCATTTGGGG	22	2	undef	aae	HIST	Low expression
809	miR-3776	AGGAGTGGGGGAGAGAGGAAGGGCAG	26	2	undef	ame	HIST&NC	Low expression
810	miR-4418	ACTGACAGGACTGAGCATG	19	5	undef	hsa	HIST&NC	Low expression
811	miR-932*	GGCAAGCGGCTGTGGACATGGACAG	25	2	mir-932	dps	HIST&NC	Low expression
812	miR-455b	GTATGTGCCTTTGGACTACA	20	3	mir-455	dre	HIST&NC	Low expression
813	miR-551b*	AAATCAAGCTTGGGTGAGACCTG	23	4	mir-551	mmu	HIST&NC	Low expression
814	miR-2481	ACATTGTCTGCTGGGTTA	18	4	undef	bta	HIST&NC	Low expression
815	miR-2888	AGGGGGTGGGGGGGTTTGT	19	3	undef	bta	HIST&NC	Low expression
816	miR-4478	GAGGACTCAGCCTGAGGAG	19	13	undef	hsa	HIST&NC
817	miR-2444	TTTGTTTGTTTGTTTGTCTG	20	9	undef	bta	HIST&NC	Low expression
818	miR-3093-5p	CGCACCCACGCGGAGCTCACAC	22	4	undef	mmu	HIST&NC	Low expression
819	miR-1614*	ATGGGGAACTGCGAGCAGA	19	3	undef	gga	HIST&NC	Low expression
820	miR-2014*	TCGGTCGGGCTGGGGCGCGCAGCG	24	4	undef	aqu	HIST&NC	Low expression
821	miR-1178	CTTACTGACTGTTCTTCCTAG	21	2	mir-1178	hsa	HIST	Low expression
822	miR-125a*	ACAGGTTAGGCTCTTGGGAGT	21	8	mir-125	bfl	HIST&NC	Low expression
823	miR-1777	GTGAGGCGGGCGGGGCTGTG	20	9	undef	gga	HIST&NC	Low expression
824	miR-1777a	TGGGGGCGCGCGGGCGGG	18	7	undef	bta	HIST&NC	Low expression
825	miR-1797	CCATGTGGAACTGGAGCAGGAGCTG	25	2	undef	gga	HIST&NC	Low expression
826	miR-932	TTGGAACAATGTAGGTAAGTGAAG	24	5	mir-932	aae cqu	HIST&NC	Low expression
827	miR-466i-5p	TGTGTGTGTGTGTGTGTGTG	20	36	mir-467	mmu	HIST&NC
828	miR-4104-5p	ACGTGAAATTGTTGAAAGGG	20	3	undef	cin	HIST&NC	Low expression
829	miR-3171	ATGATGTTGGAATGGTATATATT	23	2	undef	hsa	HIST	Low expression
830	miR-669n	ATGTGTGTGTGTGTATGT	18	2	undef	mmu	HIST&NC	Low expression
831	miR-1827	TGAGGCAGTAGATTGTAT	18	5	mir-1827	hsa ptr	HIST&NC	Low expression
832	miR-2371	TCTATTTTGTTGGTTTTC	18	2	undef	bta	HIST&NC	Low expression
833	miR-2384	ATGGACTGGATGGATGGATGG	21	2	mir-2384	bta	HIST&NC	Low expression
834	miR-750	CCAGATCTAACTCTTCCAGCTCA	23	2	mir-750	cte	HIST	Low expression
835	miR-928	TGGCTGTGGAGCTGGCTGACA	21	6	mir-928	nvi ame	HIST&NC	Low expression
836	miR-126b	TCGTACCGTGAGTAATACTGA	21	7	mir-126	dre	HIST&NC	Low expression
837	miR-509-3p	TGTTGACATTCTGAATGC	18	2	mir-506	mmu	HIST&NC	Low expression
838	miR-690	AAAGGCTAGGCTCACAACC	19	8	undef	mmu	HIST&NC	Low expression
839	miR-2825	CAGGATCCTTAGAAGCAT	18	3	undef	bmo	HIST&NC	Low expression
840	miR-1759	AGGGAGGAGGAGGAGGTG	18	2	undef	gga	HIST&NC	Low expression
841	miR-4003c-5p	TAGTTGTGTGATCATTGTAG	20	2	undef	cin	HIST	Low expression
842	miR-196b	TAGGTAGTTTCCTGTTGTTGGG	22	5	mir-196	hsa cfa mdo	HIST&NC	Low expression
843	miR-1244	TAAGTAGTTGGTTTGTATGAGATGGT	26	7	mir-1244	hsa	HIST&NC	Low expression
844	miR-804	TTGTGAGTTCGTGCCTCACCTGGAGC	26	3	undef	mmu	HIST	Low expression
845	miR-1188*	TCCGAGGCTCCCCACCACACCCTGC	25	2	mir-1188	mmu	HIST&NC	Low expression
846	miR-3110*	GGACGTCCATTCGGAAGGCAGAAC	24	2	undef	mmu	HIST	Low expression
847	miR-84	TGAGGTAGTAAGTTATATTGTAA	23	5	mir-84	cel crm	HIST&NC	Low expression
848	miR-4306	TGGAGAGAAAGGCAGTAG	18	3	undef	hsa	HIST&NC	Low expression
849	miR-4062-3p	AGTGCTGTAATTAAAGGC	18	5	undef	cin	HIST&NC	Low expression
850	miR-4657	AATGTGGAAGTGGTCTGAGGC	21	3	undef	hsa	HIST	Low expression
851	miR-3656	GGGCGGGGCCGGGGGTGG	18	10	undef	hsa	HIST&NC
852	miR-466i-3p	TACACACACACATACACACAGA	22	3	mir-467	mmu	HIST&NC	Low expression
853	miR-4280	AGTGTAGTTCTGAGCAGC	18	4	undef	hsa	HIST&NC	Low expression
854	miR-378i	ACTGGACTAGGAGTCAGAAGG	21	5	undef	hsa	HIST&NC	Low expression
855	miR-3650	AGCTGTGTCTGTGGGAGTCC	20	3	undef	hsa	HIST	Low expression
856	miR-796	TGGAAATGTAGATCAGTGTTAGAA	24	2	undef	cel	HIST	Low expression
857	miR-2753	TCAAGATGGAAGAACTGGTGGA	22	3	undef	bmo	HIST&NC	Low expression
858	miR-2839	ACGGCTCACTGTTTGACGGT	20	2	undef	bmo	HIST	Low expression
859	miR-4088-5p	GACCAATGATGAGATCTGG	19	2	undef	cin	HIST&NC	Low expression
860	miR-548o	CCAGAAACTGCAGTTCTTTTG	21	2	undef	hsa	HIST&NC	Low expression
861	miR-4674	CTGGGCTGGGCGGGCGGCTG	20	4	undef	hsa	HIST&NC	Low expression
862	miR-32*	CAATTTAGTGTGTGTGATATT	21	2	mir-32	mmu	HIST&NC	Low expression
863	miR-1266	CTCAGGGCTGTGAACCGGGC	20	2	mir-1266	hsa	HIST&NC	Low expression
864	miR-200c*	CGTCTTACCCAGCAGTGTTTGG	22	2	mir-8	hsa	HIST	Low expression
865	miR-4485	TAAACGGCCGCGGTATCCTG	20	5	undef	hsa	HIST&NC	Low expression
866	miR-1205	TCTGGAGGGCCTTGCTTTGCAG	22	3	mir-1205	hsa	HIST&NC	Low expression
867	miR-564	AGGACTGGTCAGCAAGGC	18	9	mir-564	hsa ppy	HIST&NC	Low expression
868	miR-1306-3p	ACGTTGGCTCTGGTGGTGATGT	22	5	mir-1306	mmu	HIST&NC	Low expression
869	miR-2024a*	AAATTTCGGTTGGGTAAAA	19	2	mir-2024	nve	HIST	Low expression
870	miR-682	CTGCAGTCACAGTGAAGTCTGC	22	2	undef	mmu	HIST	Low expression
871	miR-4652-5p	AGGGGACTGGTAAAAAAATA	20	2	undef	hsa	HIST	Low expression
872	miR-1376	TAGAGATTGGGCTGTGGAA	19	2	undef	oan	HIST&NC	Low expression
873	miR-3865-5p	AGACAAGATCTTGGGCTG	18	3	undef	tca	HIST	Low expression
874	miR-4487	CAGAGCTGGCTGAAGGAA	18	3	undef	hsa	HIST&NC	Low expression
875	miR-2347	TGAAGGGCACAAGAGCTGAAC	21	2	undef	bta	HIST&NC	Low expression
876	miR-23b*	TGGGTTCCTGGCATGCTGATT	21	4	mir-23	hsa mmu	HIST&NC	Low expression
877	miR-760-5p	CCCCTCAGGCCACCAGAGCCCGGA	24	4	mir-760	mmu	HIST	Low expression
878	miR-1352	TGGACTATGTACATTTGTGG	20	3	undef	oan	HIST	Low expression
879	miR-1689	ACCGGCACTGGAAGCAGCTGATGA	24	2	undef	gga	HIST	Low expression
880	miR-285	CTAGCACCATTTGAAATCAGTAAAC	25	4	mir-29	isc aae	HIST&NC	Low expression
881	miR-4127-3p	AGGCAGCTGGGAGAACTG	18	4	undef	cin	HIST&NC	Low expression
882	miR-30g	TGTAAACATCCTTCACTCTCAGC	23	2	mir-30	pma	HIST&NC	Low expression
883	miR-5099	TTGGATCGATGTGGTGCTGCCGC	23	5	undef	mmu	HIST&NC	Low expression
884	miR-466l-5p	TGTGATGTGTGCATGTACATGTAT	24	2	mir-467	mmu	HIST	Low expression
885	miR-4539	GCTGACTGGGCTGACTGC	18	4	undef	hsa	HIST	Low expression
886	miR-148*	AAGACATTCTGTGGCACTCCAGACT	25	2	mir-148	oan	HIST&NC	Low expression
887	miR-8	TAATACTGTCTGGTAAGAGAAG	22	2	mir-8	cqu	HIST	Low expression
888	miR-620	ATGGATAGATACTAGGAAAT	20	2	undef	hsa	HIST&NC	Low expression
889	miR-875-5p	TATACCTCAGTTTTATCAGGT	21	4	mir-875	hsa	HIST&NC	Low expression
890	miR-4572	GCTGCGTCGGGCTCAGCCGG	20	2	undef	pma	HIST	Low expression
891	miR-378h	ATGGACGTGGAGCAGATGG	19	2	undef	hsa	HIST	Low expression
892	miR-2192	AAGGAAAGGCACTGAGAC	18	2	undef	dre	HIST&NC	Low expression
893	miR-4434	ACGGAGTAGAAAGCTAGAA	19	11	undef	hsa	HIST&NC
894	miR-2974	GAGGGAGGGCTGGGCTGTGG	20	8	undef	tgu	HIST&NC	Low expression
895	miR-2464-5p	AGTGTCTGCTGCAGAGCCTGAAGA	24	3	undef	bta	HIST&NC	Low expression
896	miR-2447	TCTGGGAACGGCTGGCTGTCT	21	2	undef	bta	HIST	Low expression
897	miR-4962-3p	GACGATGTAGGAGTGGGTAGG	21	2	undef	dme	HIST	Low expression
898	miR-2982	TGGAGAGAGGGCTTGGGT	18	7	undef	tgu	HIST&NC	Low expression
899	miR-1191	CAGTCTTCCATGTAGCCCAGA	21	2	undef	mmu	HIST	Low expression
900	miR-2441	ACAGACGGACAGTGGAGC	18	8	undef	bta	HIST&NC	Low expression
901	miR-2467-3p	CAGCAGAGGCACGAGAGCTCCAGG	24	4	undef	hsa	HIST&NC	Low expression
902	miR-1563	GACATGTGCCGGAAGACTGAAA	22	1	undef	gga	HIST	Low expression
903	miR-2426	AGGGAACGTGAGCTGGGGAAAG	22	1	undef	bta	HIST	Low expression
904	miR-1819	TGGAATGTATATGATCATTGAGGA	24	2	undef	cel	HIST&NC	Low expression
905	miR-252	CAGACTGTGCAGCAGGAG	18	1	mir-252	ngi	HIST	Low expression
906	miR-1705	AATCTGGAAGGCAGAACTGT	20	1	undef	gga	HIST	Low expression
907	miR-1262	ATGGGTGACTATGTAGACAGAGGAT	25	1	mir-1262	hsa	HIST&NC	Low expression
908	miR-548f	AATAGACTGTAATTACATT	19	1	mir-548	hsa	HIST	Low expression
909	miR-876-5p	TGGATTTCTCTGTGAATC	18	1	mir-876	mmu	HIST&NC	Low expression
910	miR-4080-3p	CTAACCTAGAATGACTGCA	19	2	mir-4079	cin	HIST	Low expression
911	miR-575	CGGGACAGTTGGGCAGGAGC	20	1	mir-575	ppy	HIST&NC	Low expression
912	miR-4299	AGCTGGTGAACGAGAGGC	18	2	undef	hsa	HIST&NC	Low expression
913	miR-1809	CACGTGGGACAGTTGACAGGCATG	24	1	undef	gga	HIST	Low expression
914	miR-4658	GATGATGAGCGGATCCTGGAGGAT	24	1	undef	hsa	HIST	Low expression
915	miR-4874	ATGTCTGTAGCATCACAGTGGGCT	24	1	undef	bfl	HIST	Low expression
916	miR-1629	TGCTGTCGGTGGGTTGAACT	20	1	undef	gga	HIST&NC	Low expression
917	miR-590	ACTTTTATGGATAGAAGT	18	1	mir-590	oan	HIST	Low expression
918	miR-706	AGAGAAACTGTTTGAAAAAA	20	1	undef	mmu	HIST	Low expression
919	miR-153c	TTGCATAGTCACAAAAATGATC	22	1	mir-153	dre	HIST	Low expression
920	miR-3677-5p	CAGGTGGTCAGAGGGCCTGCAGGTG	25	1	undef	hsa	HIST&NC	Low expression
921	miR-753d-5p	CAGGCTGGATTGGAACTC	18	1	mir-753	sme	HIST	Low expression
922	miR-669e*	TGTATATACACACACACGC	19	1	mir-467	mmu	HIST	Low expression
923	miR-3840-5p	CGGGGTACTGTAAGCCGTA	19	2	undef	tca	HIST	Low expression
924	miR-2307	ATGAATGACCCTCTGAGC	18	1	undef	bta	HIST&NC	Low expression
925	miR-1257	AGGAATGATGTTGCTCTGACC	21	2	mir-1257	hsa	HIST	Low expression
926	miR-1609	GAGGCTGGGCTGTGTGGTTG	20	1	mir-1609	gga	HIST	Low expression
927	miR-1715	AGGATCAGTGAGAGTCTGTGGGC	23	1	undef	gga	HIST	Low expression
928	miR-4520a-3p	TAGGACAGAAAACACACAAGCGAAG	25	1	mir-4520	hsa	HIST	Low expression
929	miR-4654	TGTGGGACTGGAGACATCAGTGTG	24	1	undef	hsa	HIST	Low expression
930	miR-1541	TGAGTGTGTCTGGTTTGATGTGGA	24	2	undef	mdo	HIST	Low expression
931	miR-4075-3p	TAAAGATCAAAGGTCCACC	19	1	undef	cin	HIST	Low expression
932	miR-283-5p	AAATATCATCAGGTAATTCTGG	22	1	mir-216	tca	HIST	Low expression
933	miR-4293	CAGCCTGAACCAGCGGACAG	20	4	undef	hsa	HIST&NC	Low expression
934	miR-2379	AGGCGCTGGAGATGATGACTTT	22	3	undef	bta	HIST	Low expression
935	miR-1934	TCTGTCTTCTGCTTCGTCTCT	21	1	undef	mmu	HIST	Low expression
936	miR-3382*	TGTCTCCGGATAGATCTGAACC	22	1	undef	bmo	HIST	Low expression
937	miR-147	GTGTGCGGAAATGCTTCTGCTA	22	3	mir-147	gga mmu	HIST&NC	Low expression
938	miR-2410	CTGAGGTAGGAGGACTGTGA	20	2	undef	bta	HIST&NC	Low expression
939	miR-1649	TACCGGAAGGTGCGGCTG	18	1	undef	gga	HIST	Low expression
940	miR-1626	TCTGGACGTTGCCTGTGGACGG	22	1	undef	gga	HIST	Low expression
941	miR-4331	GGGCTGTGGTGAAGGACCAGC	21	1	undef	ssc	HIST	Low expression
942	miR-2383	CTGAGTGATCGATGATGACT	20	3	undef	bta	HIST&NC	Low expression
943	miR-466p-5p	TATGACTGTGTACCATGTACAT	22	1	mir-466	mmu	HIST	Low expression
944	miR-1755	TTGGTGTATGTGCTTGGCTG	20	1	undef	gga	HIST	Low expression
945	miR-4796-3p	TGAAAGGGACAGAGTAAGACAC	22	1	undef	hsa	HIST	Low expression
946	miR-4099-3p	TGGATGACATGGCTGTAGA	19	1	undef	cin	HIST&NC	Low expression
947	miR-654-5p	TGGAAGCTCAGAACAGGT	18	1	mir-654	mmu	HIST	Low expression
948	miR-644	CAGAGTGACTGCTTAGAGC	19	3	mir-644	hsa mml	HIST&NC	Low expression
949	miR-2508	TAGAACTCAAGAAGCAAAGG	20	1	undef	dps	HIST	Low expression
950	miR-1836	TAGCATTGTAGATAGAGATG	20	1	undef	cfa	HIST	Low expression
951	miR-488*	CCCAGATAATGGCACTCTCAA	21	3	mir-488	hsa	HIST&NC	Low expression
952	miR-223*	CGTGTATTTGACAAGCTGAGTTGGACAC	28	2	mir-223	mmu	HIST	Low expression
953	miR-2341	CAGTAGGTAGAGAAGGCTGT	20	3	undef	bta	HIST&NC	Low expression
954	miR-315b	TTTTGATTGATGAAAGAACC	20	2	undef	dvi	HIST	Low expression
955	miR-4009a-5p	AGGTTTTCCATGTAGAGC	18	1	undef	cin	HIST	Low expression
956	miR-1844	AGGACAGGGCGGGCTGAG	18	3	undef	cfa	HIST&NC	Low expression
957	miR-2962	AGGGCGGGAAGGGGCTGGGCA	21	1	undef	tgu	HIST&NC	Low expression
958	miR-885-3p	AGGCAGCGGGCTTGTAGAGGA	21	1	mir-885	ssc	HIST&NC	Low expression
959	miR-462	TAACGGAATCCCAAATGCAG	20	1	undef	dre	HIST	Low expression
960	miR-4782-5p	TCTGGATATTGAAGACAATGAGA	23	1	undef	hsa	HIST	Low expression
961	miR-3064-3p	TTTGCCACACTGCAACACCTT	21	4	mir-3064	hsa	HIST&NC	Low expression
962	miR-262	AGGTTCTGGATGTTTCTGAT	20	1	undef	cel	HIST	Low expression
963	miR-3125	CAGGGAAGACTGTGGAGAA	19	5	undef	hsa	HIST&NC	Low expression
964	miR-4018b-5p	AGGACACATTCTGGAAGGG	19	3	undef	cin	HIST&NC	Low expression
965	miR-2563	TGTGTATTGCCTCCTGGTAG	20	2	undef	dps	HIST	Low expression
966	miR-15c	TAGCAGCACATCATGGTTTAT	21	1	mir-15	oan	HIST&NC	Low expression
967	miR-2808a*	CGGTGTGTGATTCTGGAAGTCC	22	1	mir-2808	bmo	HIST	Low expression
968	miR-4260	CTTGGGGAGCTGGAGTCGCCA	21	1	undef	hsa	HIST	Low expression
969	miR-1577	CTAGGAGTGGAAGAGGAGGAA	21	2	undef	gga	HIST	Low expression
970	miR-2969	GCAGCATGGAGCAGTGATGG	20	1	undef	tgu	HIST	Low expression
971	miR-882	TGGAGAGAGTTAGCGAACATGTAG	24	1	undef	mmu	HIST	Low expression
972	miR-4001a-5p	TGGAACAGAACAACAGGC	18	1	undef	cin	HIST&NC	Low expression
973	miR-3526	TATGAGGATGAGTTGGTG	18	2	undef	gga	HIST	Low expression
974	miR-294	AAAGTGCTTCCATTTTGTGTGT	22	2	mir-290	mmu	HIST	Low expression
975	miR-3870-5p	TAGAGGACACAAGAGTAAA	19	1	undef	tca	HIST&NC	Low expression
976	miR-1237	TCCTCTGCTCCGTCCCTGTAG	21	1	mir-1237	hsa	HIST	Low expression
977	miR-1664	TCTGTGACACCCATTGACCTCCA	23	1	undef	gga	HIST&NC	Low expression
978	miR-3203	ACGTCAGTCAGTCAGTCAGG	20	1	undef	bmo	HIST	Low expression
979	miR-470	TTCCATTGGACAGGCACTGTGAG	23	1	mir-743	mmu	HIST	Low expression
980	miR-229*	AGAGAGGTGATCGGGTGTAGAG	22	1	undef	cel	HIST	Low expression
981	miR-2723	CCAGCAGTAGATCGTCGTG	19	2	undef	bmo	HIST&NC	Low expression
982	miR-2428	TGGCTGGGAGGCGGCGGCGG	20	2	undef	bta	HIST	Low expression
983	miR-61a*	CAGTTTGGATTTCTAGGC	18	1	undef	sme	HIST	Low expression
984	miR-1763	GAGGGCGGGAGGCAGGAGAGGGCA	24	3	undef	gga	HIST&NC	Low expression
985	miR-374c	TAATACAACCTGCTAAGTGTTC	22	3	mir-374	hsa	HIST	Low expression
986	miR-4741	CGGGCTGGGAGGCGGTCGGCT	21	1	undef	hsa	HIST	Low expression
987	miR-4016-3p	TGTTCTGGACATAAAGAG	18	1	undef	cin	HIST&NC	Low expression
988	miR-764-3p	AGGAGGCCATAGTGGCAACTGTAGC	25	3	mir-764	mmu	HIST&NC	Low expression
989	miR-12	TAGGGCTGTTACATCAGGTGACTGA	25	1	undef	cte	HIST	Low expression
990	miR-3180	GTTGCGGAGCTTCCTGGAG	19	1	mir-3180	hsa	HIST	Low expression
991	miR-1931	ATCAAGGGCTGGTTCGAGC	19	2	undef	mmu	HIST&NC	Low expression
992	miR-1841	AGAGAGAAAGCTGGCACTGCGGAAGC	26	1	undef	cfa	HIST	Low expression
993	miR-1996b	TATCAAGCTGAGGTCATATCGTTGG	25	1	undef	cte	HIST	Low expression
994	miR-1638	TGTTTGTTTGTTTGTTTGTTT	21	1	undef	gga	HIST&NC	Low expression
995	miR-1331	TGGGGTGGAGGTGGGGTGTGG	21	1	undef	oan	HIST	Low expression
996	miR-1400*	GATGGACAGAGTTGGAAGA	19	2	undef	oan	HIST&NC	Low expression
997	miR-3096-5p	TGGCCAAGGCAAGCAGATCT	20	4	mir-3096	mmu	HIST&NC	Low expression
998	miR-3002	TAGAAATAAATTGTGGCCTATG	22	1	undef	hma	HIST	Low expression
999	miR-4025-5p	GTGATTGTTTTTGAAAAGA	19	1	undef	cin	HIST&NC	Low expression
1000	miR-315	TTTTGATCGGTCAGAAAG	18	1	mir-315	sko	HIST	Low expression
1001	miR-1648*	CGGCAGGGAGCGGAGCTGT	19	2	undef	gga	HIST&NC	Low expression
1002	miR-2162-5p	AGGGGATTTGTTGATGATTTACA	23	1	undef	sja	HIST&NC	Low expression
1003	miR-9b-3p	ATAAAGCTAGATAAAAGTA	19	1	mir-9	tca	HIST	Low expression
1004	miR-569	ATTAATGAACCTGGGAAG	18	1	mir-569	hsa	HIST	Low expression
1005	miR-668-3p	TGTCACTCGGCCCACTACC	19	1	mir-668	oar	HIST	Low expression
1006	miR-755-5p	TGGAGTACTGTATTTACA	18	1	undef	sme	HIST	Low expression
1007	miR-1183	CACTGTAGGTAAGGGAAGTCGGCA	24	1	mir-1183	hsa	HIST&NC	Low expression
1008	miR-2220	TCATTGTTGTGACTTACA	18	1	undef	cel	HIST	Low expression
1009	miR-4823	ACCAGTTTGTTGTCATGGA	19	1	undef	sko	HIST	Low expression
1010	miR-646	AAGCAGCTGGCACTGAGG	18	1	mir-646	hsa	HIST&NC	Low expression
1011	miR-2346	TCTGGATGGAAGGTGGTTTGGT	22	1	undef	bta	HIST&NC	Low expression
1012	miR-1187	GGTATGTGGTGTGTGTGTGTGTGA	24	4	undef	mmu	HIST&NC	Low expression
1013	miR-3504	TGTGGGTTGTAGAAGGGC	18	1	undef	sja	HIST	Low expression
1014	miR-4656	TGGGCTGAGGACAGGACCTG	20	1	undef	hsa	HIST	Low expression
1015	miR-312	ATGGCACATTTGAGAAGGGAG	21	1	undef	ppc	HIST&NC	Low expression
1016	miR-2*	CACAAGCGGTGGATGATGTGG	21	2	mir-2	cel	HIST&NC	Low expression
1017	miR-3878-5p	AGGGACGGAGAACTATTTG	19	1	undef	tca	HIST&NC	Low expression
1018	miR-1422i	AAGACTGACTGGATTGAC	18	1	mir-1422	oan	HIST	Low expression
1019	miR-3901-5p	TATTTTATTTATATGAGT	18	1	undef	tca	HIST	Low expression
1020	miR-309a-5p	AGATGAACTTGAACTTGGT	19	2	undef	tca	HIST&NC	Low expression
1021	miR-678	GTGCTGGGTGAAGGACTGAGG	21	2	mir-678	mmu	HIST&NC	Low expression
1022	miR-2238e	AAGACAGAACAGGGGAGAG	19	1	mir-2238	ppc	HIST&NC	Low expression
1023	miR-1962	AGAGGCTGAGCACGGGAGCAGAAT	24	2	undef	mmu	HIST&NC	Low expression
1024	miR-5047	TTGAGGTCGGTTGTATGGT	19	1	undef	hsa	HIST	Low expression
1025	miR-19b*	AGTTTTCTGGATGTTTGTGTCGGCA	25	1	mir-19	pma	HIST	Low expression
1026	miR-4118-3p	TGAAATGGTTGTCAAGAG	18	1	undef	cin	HIST	Low expression
1027	miR-256	TAGGAATGAATGAAGACTGA	20	1	undef	cel	HIST&NC	Low expression
1028	miR-1971	GTTAGGGCTGAGGCTGTAGA	20	4	undef	mmu	HIST&NC	Low expression
1029	miR-2575*	CAGAGTCATCAGTAGAACAG	20	1	undef	dps	HIST	Low expression
1030	miR-29-3p	TAGCAGCCGAATTAGAAATGGT	22	1	undef	cin	HIST	Low expression
1031	miR-215*	TCTGTCATTCTGTAGGCCAAT	21	1	mir-192	mmu	HIST	Low expression
1032	miR-4311	GAAGAGAGTCTGAGTGTGC	19	2	undef	hsa	HIST	Low expression
1033	miR-356	TTGAGCAAATGAACAAACA	19	1	mir-356	cel	HIST	Low expression
1034	miR-2201	TTCTGAAGAAGCTGTAGGAC	20	2	undef	sme	HIST	Low expression
1035	miR-4888	TCAGAGCTTTGAGACTTGGCGC	22	1	undef	bfl	HIST	Low expression
1036	miR-2263	GTCTGGGCTTCTTTAGGA	18	1	undef	ppc	HIST	Low expression
1037	miR-2352	TGACTGAAGAACAGATTGCTG	21	2	undef	bta	HIST&NC	Low expression
1038	miR-424*	CAAAACATGAAGCGCTGCA	19	1	mir-322	hsa	HIST&NC	Low expression
1039	miR-4983-5p	ACTTGCTCGAATTTGCAGTTTCT	23	1	undef	dme	HIST&NC	Low expression
1040	miR-748	TAGACTGGAAGTGTAAGAGA	20	2	undef	sme	HIST&NC	Low expression
1041	miR-4273	GCAGTGTTCTCTGATGGCAG	20	1	undef	hsa	HIST&NC	Low expression
1042	miR-1278	CTAGTACTGTGCATCTCAC	19	1	mir-1278	ptr	HIST	Low expression
1043	miR-4218-5p	GAGATTTTAGTAAAAAGATGG	21	1	undef	cin	HIST	Low expression
1044	miR-3967	AGCTTCTCTGACTGTGTAGA	20	1	undef	mmu	HIST	Low expression
1045	miR-1612	CAGGAAAAGGAGCTACTGGC	20	1	undef	gga	HIST	Low expression
1046	miR-2406	AGGGAGAAGAAGCTGGAT	18	1	undef	bta	HIST	Low expression
1047	miR-1453	TGTGGACAGCCTCTCAGTTAGCC	23	1	undef	gga	HIST	Low expression
1048	miR-1788-3p	CAGGGACGAAAGCAGAGTCGG	21	1	mir-1788	gga	HIST	Low expression
1049	miR-4047-5p	TAAGAACTCAGAAACACAGA	20	1	undef	cin	HIST&NC	Low expression
1050	miR-2330	TGGGCTTGGGGTGGGGACGGG	21	1	undef	bta	HIST&NC	Low expression
1051	miR-381-5p	AGCGAGGTTGCCCCTTGTAG	20	2	mir-154	oar	HIST	Low expression
1052	miR-4077b-5p	ACGTGGAATTTGATGACCT	19	1	mir-4077	cin	HIST&NC	Low expression
1053	miR-281-2-5p	AAGAGAGCTATTCGTCGACGGT	22	2	mir-46	dme	HIST	Low expression
1054	miR-2049	CAAATGTAGCAAAATGAAGTGAC	23	1	undef	nve	HIST	Low expression
1055	miR-3850-3p	TTCGGACAAATGTTGGCT	18	2	undef	tca	HIST	Low expression
1056	miR-3691-5p	AGTGATGATGGAGACTGGGGA	21	1	undef	hsa	HIST	Low expression
1057	miR-4315	CTGGCTTTCTGACTGGAGC	19	1	mir-4315	hsa	HIST	Low expression
1058	miR-1788a-3p	CTAGGAGCTGACAGCAGAAGCCTGA	25	2	mir-1788	pma	HIST	Low expression
1059	miR-4726-5p	AGGGACTCAGAGGGCCTGGATGGA	24	1	undef	hsa	HIST	Low expression
1060	miR-4797-3p	TTCAGTTGGGCACTCTGT	18	1	undef	hsa	HIST	Low expression
1061	miR-3861-5p	TCTGGATTTAATTTGGTATC	20	1	undef	tca	HIST&NC	Low expression
1062	miR-4257	CAGAGGTGGGGGACTAGAG	19	1	undef	hsa	HIST&NC	Low expression
1063	miR-4496	AGGAACTGAAGTAGAGGG	18	2	undef	hsa	HIST&NC	Low expression
1064	miR-664-5p	CAGGAGGAGAAGTGATTGGGGAA	23	1	mir-664	ssc	HIST&NC	Low expression
1065	miR-10d	TACACTGTAGAAGGCATT	18	1	undef	cte	HIST&NC	Low expression
1066	miR-1421l-1*	TGTATCCCTCTGAGCTCT	18	1	mir-1421	oan	HIST	Low expression
1067	miR-4326	TTGTTCCTCTGTCCTTCCAGC	21	1	undef	hsa	HIST&NC	Low expression
1068	miR-1749	AGTAAGGAACTGAGAATGGT	20	2	undef	gga	HIST	Low expression
1069	miR-4135-3p	GCCTGTTGATTGGTGGTA	18	1	undef	cin	HIST	Low expression
1070	miR-93b	GTGCTGTTCGTGCAGGTAG	19	2	mir-17	xtr	HIST&NC	Low expression
1071	miR-3127-5p	CAGTTAGAGGCTTGTGGAATGAGAAG	26	1	undef	hsa	HIST	Low expression
1072	miR-14	TCAGTCTTTTTCTCTCTCCTAT	22	1	mir-14	aae	HIST	Low expression
1073	miR-4768-3p	CAGGAGAGCCAGAGAAATG	19	1	undef	hsa	HIST&NC	Low expression
1074	miR-1772*	ACGCTGCCAGCGGAGAAGGT	20	1	undef	gga	HIST	Low expression
1075	miR-4523	GACCGACAGGGCCTCGGCTGTAA	23	1	undef	hsa	HIST&NC	Low expression
1076	miR-211*	GCAAGGACAGCAAAGGGGGGC	21	4	mir-204	mmu	HIST	Low expression
1077	miR-1970	TGTGTCACTGGGAGCTGGCTTTGA	24	2	undef	mmu	HIST&NC	Low expression
1078	miR-2291	GCGAGTGAGGACTGGGGCAG	20	1	undef	bta	HIST	Low expression
1079	miR-79-3p	TAAAGCTAGATAACCGAAAGCAT	23	1	mir-9	dme	HIST&NC	Low expression
1080	miR-4198-5p	AATGATGGTACTTTTGAATG	20	1	undef	cin	HIST	Low expression
1081	miR-967-5p	GAGAGAACTCTGGAGAAGGT	20	4	mir-967	dme	HIST&NC	Low expression
1082	miR-1793	TGTCAGGGCAGGGAAGTGTGAAGG	24	2	undef	gga	HIST	Low expression
1083	miR-668*	GTAAGTGTGCCTCGGGTGAGC	21	2	mir-668	mmu	HIST&NC	Low expression
1084	miR-4769-3p	TCTGCCCTCCCCCTCCCCT	19	1	undef	hsa	HIST	Low expression
1085	miR-4087-3p	CCGTGGATGTGACTTATG	18	1	undef	cin	HIST&NC	Low expression
1086	miR-198	AGCTACAGAGGGGAGCTCGAC	21	1	mir-198	sla	HIST&NC	Low expression
1087	miR-4732-5p	TGTAGAGTGAGGCAGCTAGGAGAGCT	26	1	undef	hsa	HIST&NC	Low expression
1088	miR-4058-5p	AAGGAGCTGGGTTTGAGC	18	1	undef	cin	HIST	Low expression
1089	miR-4080-5p	TGGACATTCAGCTAGAGC	18	1	mir-4079	cin	HIST	Low expression
1090	miR-4878	ATTTGGCTGTGCAGAGATGACCTG	24	1	undef	bfl	HIST	Low expression
1091	miR-2408	CACGTGTAGAGCTGCCGG	18	1	undef	bta	HIST&NC	Low expression
1092	miR-4197-5p	TCATGGTTCAGGGCATCAGG	20	1	undef	cin	HIST	Low expression
1093	miR-1291	TGACTCTGATGAAGACCAGCAT	22	1	mir-1291	hsa	HIST&NC	Low expression
1094	miR-218-1*	AACATGGTTCCGTCAAGCACC	21	1	mir-218	mmu	HIST&NC	Low expression
1095	miR-3792	GACTGAGGAAAGAGAGGA	18	2	undef	ame	HIST&NC	Low expression
1096	miR-4141-5p	TCGCACACTGTTTGACAC	18	1	undef	cin	HIST	Low expression
1097	miR-4024-5p	TTTGAGGATAATAAAGGTG	19	1	undef	cin	HIST&NC	Low expression
1098	miR-705	GTGGGAGGTGGCGCGGCA	18	1	undef	mmu	HIST&NC	Low expression
1099	miR-4210-5p	TTTATAGAAATGTAGCAG	18	1	undef	cin	HIST	Low expression
1100	miR-4646-5p	ATGGGAAGAGGCTGGGGA	18	4	undef	hsa	HIST&NC	Low expression
1101	miR-3610	GAATCGGAAAGGAGGCGG	18	1	undef	hsa	HIST&NC	Low expression
1102	miR-500*	TAATCCTTGCTATCTGGGTGCTTT	24	1	mir-500	mmu	HIST&NC	Low expression
1103	miR-1321	CAGGAGGTGGATGTAGAT	18	1	undef	hsa	HIST	Low expression
1104	miR-4006a-5p	TGGAACTGTAAGTAGCGGCT	20	1	undef	cin	HIST	Low expression
1105	miR-4042-3p	AGAAGGACTTAGAACATG	18	1	mir-4041	cin	HIST	Low expression
1106	miR-4502	CTGATGATGATGACTGAAG	19	1	undef	hsa	HIST	Low expression
1107	miR-2401	AGAGCTTGGTCTGCACTG	18	1	undef	bta	HIST	Low expression
1108	miR-4202-5p	GTGTGTGATTTAATTTCGTGG	21	1	undef	cin	HIST&NC	Low expression
1109	miR-1375*	CGGAGCCAGCAGAGAAGAGA	20	2	undef	oan	HIST&NC	Low expression
1110	miR-3473	CTGGAGAGATGGCTCAGTGG	20	7	mir-3473	mmu	HIST&NC	Low expression
1111	miR-2176	AAGAACATCTGTTTCACAG	19	1	undef	sme	HIST	Low expression
1112	miR-1337	TTAGGAGAATGGAGGACGAGACT	23	1	undef	oan	HIST	Low expression
1113	miR-1293	TGGGTGGTCTGTAGAGTTGCTGC	23	1	mir-1293	hsa	HIST	Low expression
1114	miR-4108-5p	GTGGACAGTAGGAGGAAC	18	1	undef	cin	HIST&NC	Low expression
1115	miR-2206-5p	AGGACAGACAGCTAAGTG	18	1	undef	sme	HIST&NC	Low expression
1116	miR-1672	GTAGGCTGGAGGGACTGTGAGG	22	1	undef	gga	HIST	Low expression
1117	miR-1356	CACCAGGAAGTCTGAGGGAGAG	22	1	undef	oan	HIST	Low expression
1118	miR-4111-3p	ATTTATGTATCTGTGGGT	18	1	undef	cin	HIST	Low expression
1119	miR-4177-3p	TAATGGTTCGTTTGTAAAAATA	22	1	undef	cin	HIST	Low expression
1120	miR-548ag	AGGTATTGTGGTTTCTGTC	19	1	mir-548	hsa	HIST	Low expression
1121	miR-3802-5p	TTGTTGAATGAAGCAGAGA	19	1	undef	tca	HIST	Low expression
1122	miR-4121-3p	GTGTTCGGTTCGGTTTGTG	19	1	undef	cin	HIST	Low expression
1123	miR-450b	TGTTGCAATATGTTCCTGAAT	21	1	mir-450	cfa	HIST	Low expression
1124	miR-4029-5p	GAAGTGGACTGTGTAAAC	18	1	undef	cin	HIST	Low expression
1125	miR-449c	AGGCAGTGGCTTGTAGCTG	19	1	mir-449	mmu	HIST	Low expression
1126	miR-3488	GGCTCCTAGCTTAGTTGGC	19	1	undef	sja	HIST&NC	Low expression
1127	miR-3169	CAGGACTGTGTTGGCAATAC	20	1	undef	hsa	HIST&NC	Low expression
1128	miR-2334	ACGACCAGCCTGTTTCTACCT	21	1	undef	bta	HIST&NC	Low expression
1129	miR-263b-5p	CTATGGCACTGGGAGAATTCAC	22	1	mir-263	dme	HIST&NC	Low expression
1130	miR-4862b*	AGGTACAGGCTAGAACTGAAGAGA	24	1	mir-4862	bfl	HIST	Low expression
1131	miR-601	GGAGTAGTGATTGTTGGAGGAG	22	1	mir-601	hsa	HIST&NC	Low expression
1132	miR-4324	TCCCTGAGACCCTAACTTAA	20	1	undef	hsa	HIST&NC	Low expression
1133	miR-327	ATTGAGGGGCTGTGGATG	18	2	mir-327	mmu	HIST&NC	Low expression
1134	miR-3534	TGTGGGATGCACAGGCTGAGGG	22	1	undef	gga	HIST&NC	Low expression
1135	miR-2842	CTGAAGACCTCGTACTGTGGC	21	1	undef	bmo	HIST	Low expression
1136	miR-1182	GAGGGCTTGGGAAGGATGATGAGG	24	1	mir-1182	hsa	HIST	Low expression
1137	miR-1733	CTGGATGACTGTGGAAATGTCAT	23	1	undef	gga	HIST	Low expression
1138	miR-9b-5p	TCTTTGGTGTTTAGCTGTAT	20	3	mir-9	dme	HIST	Low expression
1139	miR-4682	GCTGAGTTCCGGGACCGGTCT	21	1	undef	hsa	HIST	Low expression
1140	miR-297b-3p	CATACATACATACATACATA	20	1	mir-467	mmu	HIST&NC	Low expression
1141	miR-266	AGGACAACACTCTGGCAAAAGC	22	3	mir-266	cel	HIST&NC	Low expression
1142	miR-4049-5p	CAGTGTAGAATCTTTAGCTCTGGC	24	1	undef	cin	HIST	Low expression
1143	miR-147b	GTGTGAAGTGCTCCTGCT	18	1	mir-147	mml	HIST	Low expression
1144	miR-320e	AAACAGGGCTGTGAGAAGG	19	3	mir-320	hsa	HIST&NC	Low expression
1145	miR-2442	TAGAGCAGGGCTGAGGACTGCA	22	4	undef	bta	HIST&NC	Low expression
1146	miR-3126-5p	TGATGGAAGAAGCCAGAAGACA	22	2	undef	hsa	HIST&NC	Low expression
1147	miR-5111	GCGACAAGGACCTGGGTG	18	4	undef	mmu	HIST	Low expression
1148	miR-72	AGGCAAGATGTTGGCATAGCTGA	23	1	mir-72	cel	HIST	Low expression
1149	miR-1576	CGCGGGCGGGCGGGCGGACA	20	3	undef	gga	HIST&NC	Low expression
1150	miR-2412	TGGGGCTGCGGTGGGTGAAAGGG	23	2	undef	bta	HIST&NC	Low expression
1151	miR-650	AGGAGGTAGAGCTCTCAGC	19	1	mir-650	hsa	HIST	Low expression
1152	miR-3344	TTGAGAAGAACTCAGCCAGCAGA	23	1	undef	bmo	HIST&NC	Low expression
1153	miR-4874*	CTGGCTGTGTGCAAAGAGG	19	1	undef	bfl	HIST	Low expression
1154	miR-1265	CAGGATGTGCTCAAGGTTAGC	21	1	mir-1265	ppy	HIST	Low expression
1155	miR-193a-5p	TGGGTCTTTGCGGGCGAGATGA	22	2	mir-193	hsa	HIST&NC	Low expression
1156	miR-3962	GGTAGTAGGTTGTACATTT	19	5	undef	mmu	HIST&NC	Low expression
1157	miR-1558	TTCTGTGATGAGACTCTG	18	1	undef	gga	HIST&NC	Low expression
1158	miR-1960	CCATCTGTTAGAACAGGGC	19	1	undef	mmu	HIST	Low expression
1159	miR-631	CCAGGCCCAGGACCTCAGC	19	1	mir-631	cfa	HIST	Low expression
1160	miR-2343	AAGGGGAGACTGTGGATAAT	20	1	undef	bta	HIST	Low expression
1161	miR-1565	CAGGGTCGGGCCTGGTTTGTACTT	24	1	undef	gga	HIST	Low expression
1162	miR-291a-5p	CATCAAAGTGGAGGCCCTCTCTTT	24	1	mir-290	mmu	HIST	Low expression
1163	miR-1387	TGGTTTTAAACTTTGAAAG	19	1	undef	oan	HIST	Low expression
1164	miR-4012-5p	AAGCTTTATGTTCATCTTTG	20	1	mir-4012	cin	HIST&NC	Low expression
1165	miR-54a	TGTGAATATGATCAAGACGTGTATC	25	1	mir-54	cbr	HIST	Low expression
1166	miR-4800-5p	ATGGACGAGAAGGAAGGC	18	7	undef	hsa	HIST&NC	Low expression
1167	miR-307b-5p	TCACCAAGGAGGATGTGAAG	20	1	mir-307as	dme	HIST	Low expression
1168	miR-3718b	TGGGACAGGAGCATGGGACAGGA	23	1	mir-3718	ame	HIST&NC	Low expression
1169	miR-1583	CGTGGGACGTGGGAAGGCAG	20	1	undef	gga	HIST&NC	Low expression
1170	miR-1287	TGACTGGGAATCAGGGTTCGATTC	24	1	mir-1287	hsa	HIST	Low expression
1171	miR-3681	TTGGATGTGCACTCTGTC	18	1	undef	hsa	HIST	Low expression
1172	miR-1400	CACCCATCCATCCATCCAT	19	2	undef	oan	HIST	Low expression
1173	miR-4728-5p	TCGGAGGGGAGAGGCGGAAGCGA	23	1	undef	hsa	HIST	Low expression
1174	miR-2892	GCCGACGGGCGCTGACCCCCC	21	1	undef	bta	HIST	Low expression
1175	miR-998	AGCCACCTGAGATTGAGC	18	1	mir-998	aae	HIST	Low expression
1176	miR-374a	TTATAATACAACCTGCTAAGT	21	1	mir-374	cfa	HIST	Low expression
1177	miR-2399	CTCTCTTAGCTGTTGGAAC	19	1	undef	bta	HIST	Low expression
1178	miR-1195	TCTGAGTTCGAGGCCAGCCTGGT	23	1	mir-1195	mmu	HIST&NC	Low expression
1179	miR-4436a	ACAGGACTGGCAGAAGTAT	19	1	mir-4436	hsa	HIST&NC	Low expression
1180	miR-4436b-3p	CAGGGCAGGAGAGATAGCTGAACAA	25	1	mir-4436	hsa	HIST	Low expression
1181	miR-367-5p	AGCCATTCATGTGCAAGT	18	1	undef	cin	HIST	Low expression
1182	miR-241	AGGGCAGCTGCAGAAATG	18	3	mir-241	cel crm cbr	HIST&NC	Low expression
1183	miR-2789	TAAAATGTGGAGGTGGAT	18	1	undef	bmo	HIST	Low expression
1184	miR-147*	TGGAAACACTTCTGCACAAACTC	23	1	mir-147	mmu	HIST&NC	Low expression
1185	miR-4000e-5p	AGAACTTCTCTGAACAGG	18	1	undef	cin	HIST&NC	Low expression
1186	miR-133*	GTGGAAAAGTGGAATATA	18	1	mir-133	cin	HIST	Low expression
1187	miR-34	GGAGTGGTAGTTCAGCTGGTTAG	23	1	mir-34	spu	HIST&NC	Low expression
1188	miR-3842-5p	AGGAGGAAAGAACAAGCAG	19	4	undef	tca	HIST&NC	Low expression
1189	miR-1772	TCATTGCTGTCGGTGGAG	18	1	undef	gga	HIST	Low expression
1190	miR-311*	AAGGCTGGGGATGGGCAGAGTAAT	24	1	mir-310	dps	HIST	Low expression
1191	miR-1494	AGACAAGGACAGTGTTTGG	19	1	undef	odi	HIST	Low expression
1192	miR-1926	TGGAATCTAAAGAATAAAAGG	21	1	mir-927	bmo	HIST	Low expression
1193	miR-4059-5p	TAGGCATAAAAGACAGTTTG	20	1	undef	cin	HIST	Low expression
1194	miR-3483-5p	GCTGAGATTGTAGGAAAT	18	1	undef	sja	HIST	Low expression
1195	miR-1956	AGTCCAGGGCTGAGTCAGCGGATT	24	2	undef	mmu	HIST	Low expression
1196	miR-1421p	AGGGGGCTGTACCTCCTCTGACAGA	25	1	mir-1421	oan	HIST	Low expression
1197	miR-4018a-5p	CTAAGATTGTTGAACGGG	18	1	mir-4018	cin	HIST&NC	Low expression
1198	miR-2976	GCGGGGGAGCGGGCTGGG	18	8	mir-2976	tgu	HIST&NC	Low expression
1199	miR-13b*	TCGTAAATGTGGTGTGTCGT	20	1	mir-2	bmo	HIST	Low expression
1200	miR-3388	TCGCATTGGGACTCTGAACAGA	22	1	undef	bmo	HIST	Low expression
1201	miR-1550-5p	TGATGGGGGTGATCGTGAAGC	21	1	undef	gga	HIST	Low expression
1202	miR-753b-5p	AGGCTGTGATTGTGAACTC	19	1	mir-753	sme	HIST&NC	Low expression
1203	miR-84b	AGAGGTGTAGAATATGTG	18	2	mir-84	ppc	HIST	Low expression
1204	miR-1503	CAAGGAAGACTCTGGGCAA	19	1	undef	odi	HIST&NC	Low expression
1205	miR-982c	TTATTGTGATTTGTTCCTCAGAAGC	25	1	mir-982	dsi	HIST	Low expression
1206	miR-4116-5p	TGGGGCAAGAGTGGGATTTC	20	1	undef	cin	HIST	Low expression
1207	lsy-6	TTTTGTATGAGACTCTTTT	19	1	lsy-6	cel	HIST&NC	Low expression
1208	miR-1892	TTGGGGGTGGGGGTGTGGA	19	1	mir-1892	eca	HIST&NC	Low expression
1209	miR-313-5p	TTGCGGATGGGGGCAGTA	18	1	mir-310	dme	HIST	Low expression
1210	miR-4006d-5p	TTGGAACAATATAGGTAAGGG	21	2	undef	cin	HIST&NC	Low expression
1211	miR-4868c*	CGTGAGTCTGGAGCTGAGTG	20	1	undef	bfl	HIST	Low expression
1212	miR-520b	AGATGCTTCCTATGTAGAGG	20	1	mir-515	ppy	HIST	Low expression
1213	miR-210-5p	AACTGCGGACGCTGCTAGAAG	21	1	mir-210	tca	HIST	Low expression
1214	miR-325	CCTAGTAGGTGTCCAGTAAGT	21	1	mir-325	hsa	HIST	Low expression
1215	miR-4666-5p	AACTGATGTCAGATTGTATGC	21	1	undef	hsa	HIST&NC	Low expression
1216	miR-3966	AGCAAAGCTGTAGAACTGT	19	1	undef	mmu	HIST&NC	Low expression
1217	miR-2954*	ACTGAGAGGACTGGGAGAGGA	21	2	mir-2954	tgu	HIST&NC	Low expression
1218	miR-1762	AAGGAAGGAGGGAAGCTGAGTTAGA	25	1	undef	gga	HIST	Low expression
1219	miR-1579	CTGGGGGAGGGGATGGGG	18	1	undef	gga	HIST&NC	Low expression
1220	miR-193a	GGGACTTTGTTAGGACGGT	19	1	undef	bta	HIST&NC	Low expression
1221	miR-4001b-5p	TGGAACAGATGAACAAGGC	19	2	undef	cin	HIST&NC	Low expression
1222	miR-934	ATGTCTACAACTGGAGCACTTAGG	24	1	mir-934	hsa	HIST	Low expression
1223	miR-3186-3p	TCTAGGGCTGGAGAGATGGCTTTGT	25	1	undef	hsa	HIST&NC	Low expression
1224	miR-4695-5p	CAGGAGTAGACAGTGGGCGGCAGGG	25	2	undef	hsa	HIST&NC	Low expression
1225	miR-650c	AGGAGTGTAGCGCTCATGAG	20	1	mir-650	mml	HIST&NC	Low expression
1226	miR-4021-3p	AAAGATTGTGACGCGGTA	18	1	undef	cin	HIST	Low expression
1227	miR-1371	AGATGAGGACTCTGAATGC	19	6	undef	oan	HIST&NC	Low expression
1228	miR-2039	AAATATAAAGGCTAGGCTC	19	2	undef	nve	HIST&NC	Low expression
1229	miR-466g	ACACACACACATGCACACATACA	23	1	mir-467	mmu	HIST	Low expression
1230	miR-1597	TCAGGACTCTGCAGAATGCA	20	2	mir-1597	gga eca	HIST	Low expression
1231	miR-4182-3p	CAAGAAATGCTGCAGAATC	19	1	undef	cin	HIST&NC	Low expression
1232	miR-125b-2-3p	ACAAGTCAGGTTCTTGGGAC	20	1	mir-125	mmu	HIST&NC	Low expression
1233	miR-1411	GAGGATGAAACTAAGAAC	18	1	undef	oan	HIST&NC	Low expression
1234	miR-1328	AGAGAGAACTGAGAAGCCT	19	1	undef	oan	HIST&NC	Low expression
1235	miR-4534	AGGATGGAGGAGCCGGAGTCT	21	1	undef	hsa	HIST	Low expression
1236	miR-1750	TGAGGACTAAGGACACTGC	19	1	undef	gga	HIST	Low expression
1237	miR-371b-5p	AACTCAAAGGACTTGGCGGTACTTT	25	1	mir-290	hsa	HIST	Low expression
1238	miR-5095	GAAGTCGTGAACCACCGCG	19	1	undef	hsa	HIST	Low expression
1239	miR-483*	TCACTCCTCCCCTTCCGTCTTG	22	1	mir-483	mmu	HIST	Low expression
1240	miR-3965	TGCTGTCAGACCTGATGCT	19	2	undef	mmu	HIST	Low expression
1241	miR-1843b-3p	TCTGATCGTTCCTCTCCATACC	22	3	mir-1843	mmu	HIST&NC	Low expression
1242	miR-1273f	AGGACATGGAGGGCAGTG	18	1	undef	hsa	HIST	Low expression
1243	miR-1657	TATATGTGTATATGTGGTCTGT	22	1	undef	gga	HIST&NC	Low expression
1244	miR-8-3p	TAACACTGTCAGGTAAAGATGGCAA	25	4	mir-8	dme	HIST	Low expression
1245	miR-1600	TGGCTGAGAAAAGAGGGC	18	1	undef	gga	HIST&NC	Low expression
1246	miR-3198	GTGAGTCACAAGGGAATGGAGA	22	1	mir-3198	hsa	HIST	Low expression
1247	miR-713	TGACTGAAGAGGAACAGC	18	1	undef	mmu	HIST&NC	Low expression
1248	miR-3936	AAAGGGGTGTAGACAGAGCA	20	1	undef	hsa	HIST	Low expression
1249	miR-7c	TAGGAAGACTCGGATGTTTTGCTGT	25	1	undef	sme	HIST	Low expression
1250	miR-4006e-5p	TGGAAGTTAGATCGTAAGAGGC	22	1	undef	cin	HIST&NC	Low expression
1251	miR-4463	GAGACTGGGGTGGAACTC	18	2	undef	hsa	HIST	Low expression
1252	miR-3187-3p	TGGCCATGGATCTGCGGG	18	1	undef	hsa	HIST&NC	Low expression
1253	miR-2573*	TCGGGAGCAGCTTATGAGAGAAGA	24	1	undef	dps	HIST	Low expression
1254	miR-2527	TGATGATTCGGTGTAGGA	18	1	undef	dps	HIST&NC	Low expression
1255	miR-9-5p	TCTTTGGTTATCTGTATGAA	20	2	undef	cin	HIST	Low expression
1256	miR-2840	TTAGGAACTTAAGAAGAAGAGGAG	24	3	undef	bmo	HIST&NC	Low expression
1257	miR-4712-3p	AATGAAGACTTGTACTGTAAT	21	1	undef	hsa	HIST	Low expression
1258	miR-1908	CGGCGGGGCGGCGACTCTGGAC	22	2	mir-1908	hsa	HIST&NC	Low expression
1259	miR-1186	CAGAGTGCTGGGATTAAAGGCATA	24	2	undef	mmu	HIST&NC	Low expression
1260	miR-1664*	ACAGACAGGGGAGACACAGA	20	2	undef	gga	HIST&NC	Low expression
1261	miR-1901	CCGTCGTCCCTCTCGGGGGTCC	22	1	undef	mmu	HIST&NC	Low expression
1262	miR-4555	GCCAATGATGAGGAGCATGGG	21	1	undef	pma	HIST&NC	Low expression
1263	miR-2435	GAACTGAACTGAACTCTTGGGC	22	1	undef	bta	HIST&NC	Low expression
1264	miR-4687-3p	TGGGCTGTGGGAGGGGGAGGG	21	4	undef	hsa	HIST	Low expression
1265	miR-4586	AAGAGGTCGTATGGGCTGTC	20	1	undef	pma	HIST	Low expression
1266	miR-293*	AGTCAAACTTTGGACTTTTG	20	1	mir-290	mmu	HIST	Low expression
1267	miR-3925-5p	AAGAAACTGAAAGTAGAGCC	20	1	undef	hsa	HIST	Low expression
1268	miR-1016-5p	TCAAGTATTTGAGAGGATGTGGA	23	1	undef	dme	HIST&NC	Low expression
1269	miR-4181-5p	ATTGTGTCGGTCTGTCTGTCTCT	23	1	undef	cin	HIST	Low expression
1270	miR-2900	ATGGCGGCGGAACTGGAA	18	1	undef	bta	HIST&NC	Low expression
1271	miR-4516	CGGTGAGAGGGTCGGGGC	18	1	undef	hsa	HIST&NC	Low expression
1272	miR-5114	ACTGGAGAGGGAGCTGGAAG	20	1	undef	mmu	HIST	Low expression
1273	miR-1643	TAAAGATTTTGCTGCTGTGGAAGAA	25	1	undef	gga	HIST	Low expression
1274	miR-543-5p	ACTGTGGTGCTGTAGGAG	18	1	mir-329	oar	HIST	Low expression
1275	miR-1754	TCTGTTGGACTGTTCTAG	18	1	undef	gga	HIST	Low expression
1276	miR-4000f-5p	TGAAGTCGCTGGAAAAGG	18	1	undef	cin	HIST	Low expression
1277	miR-64b	CGGACACTGAGTGGCATGG	19	1	undef	cbr	HIST	Low expression
1278	miR-4047-3p	TTGTGTATCTGACTGTTTGACC	22	1	undef	cin	HIST	Low expression
1279	miR-1010-5p	AAGTGGCTGTAGATGGTAACA	21	2	mir-1010	dme	HIST	Low expression
1280	miR-1972	TCAAGCCAGGCCCAGTGGCTCA	22	1	mir-1972	hsa	HIST	Low expression
1281	miR-4092-5p	CTGTGTCTGTGGAGAACGGCA	21	1	undef	cin	HIST	Low expression
1282	miR-4773	CAGAACCAGGGCAAGAAAGGG	21	3	mir-4773	hsa	HIST	Low expression
1283	miR-1770	CTCGGGGAGGAAGGGGGGG	19	3	undef	gga	HIST&NC	Low expression
1284	miR-3138	TTGGAACAATGTAGGTAAGGGAGT	24	1	undef	hsa	HIST&NC	Low expression
1285	miR-4078-5p	CCTGTGTCGGAGTAAGGGA	19	1	undef	cin	HIST	Low expression
1286	miR-4145-3p	AAGGAATTGTTGTAGTGGC	19	5	undef	cin	HIST&NC	Low expression
1287	miR-2023	AAAGAAGGATAGTGGTGGG	19	1	undef	nve	HIST	Low expression
1288	miR-1814c	TTCTTGTTGGGTTTGTGTTT	20	2	undef	bta	HIST&NC	Low expression
1289	miR-369	GAATAATACATGGTTGGTCTT	21	1	mir-154	cfa	HIST	Low expression
1290	miR-3087*	CAGGTAGGGCAAGAGTGG	18	1	undef	mmu	HIST&NC	Low expression
1291	miR-4001h-5p	TGGAACTTGGGAGCGGGC	18	2	undef	cin	HIST&NC	Low expression
1292	miR-1981	TAAAGGCTGGACCTAGACGTGG	22	2	undef	mmu	HIST	Low expression
1293	miR-216a*	GTGAGTCACTGGGATCAGGC	20	1	mir-216	pma	HIST	Low expression
1294	miR-3070b-3p	GGGCTAATGGTCTAGGGGTATGA	23	1	mir-3070	mmu	HIST	Low expression
1295	miR-2450a	TGGTGCAGTAGAGCTGAGGTG	21	1	mir-2450	bta	HIST	Low expression
1296	miR-194-5p	TGTAACAGCGACTCCATGTGGAA	23	1	mir-194	ssc	HIST	Low expression
1297	miR-4944-3p	GTAGTTGAACAGCTGCGGAAGAAC	24	3	undef	dme	HIST	Low expression
1298	miR-344e*	TCAGGCTACTGGTTATATTCCA	22	1	mir-344	mmu	HIST	Low expression
1299	miR-2248	CTGCCAGAACTCAGTCAAGTAGAAG	25	1	undef	ppc	HIST&NC	Low expression
1300	miR-2957	TCGGATGACAGAACTGTGC	19	1	mir-2957	tgu	HIST&NC	Low expression
1301	miR-4648	GTGCGACTGCGAATGGGACG	20	1	undef	hsa	HIST&NC	Low expression
1302	miR-1562	GACTGAAGATGGAGGGACTGAC	22	1	undef	gga	HIST	Low expression
1303	miR-4180-5p	TCTGACTAGCCTGAGACTCTT	21	1	undef	cin	HIST	Low expression
1304	miR-2339	ATGCACTGGACCTGCAGAGGT	21	1	undef	bta	HIST	Low expression
1305	miR-3471	ATGAGATCCAGCTGTAAGGCAT	22	5	mir-3471	mmu	HIST&NC	Low expression
1306	miR-1349	CGCTGGGGAGAGAATCCGGA	20	1	undef	oan	HIST&NC	Low expression
1307	miR-2436-5p	CGCGCCAGCTGGGGAGGGCG	20	1	undef	bta	HIST	Low expression
1308	miR-4000b-5p	AGAGACTGAGGAACGGGC	18	3	mir-4000	cin	HIST	Low expression
1309	miR-4420	GTGACTGAGTCGAGCTGAG	19	1	undef	hsa	HIST	Low expression
1310	miR-306	CAGGTACAAGTGATTCTTGA	20	1	undef	api	HIST&NC	Low expression
1311	miR-202-5p	TTCCTATGCATATACTTCTTT	21	1	mir-202	mmu	HIST&NC	Low expression
1312	miR-1354*	TGCTGCAGAGCCTGAGTGC	19	1	undef	oan	HIST	Low expression
1313	miR-2304	GCTTGTGGGGTGTGTGTG	18	1	undef	bta	HIST	Low expression
1314	miR-4737	ATCTAGAATCTGACAGTG	18	1	undef	hsa	HIST	Low expression
1315	miR-3919	CAGAGGACAAGGACTCAGG	19	2	undef	hsa	HIST&NC	Low expression
1316	miR-4438	CACGCTTAGAAATGACGT	18	1	undef	hsa	HIST	Low expression
1317	miR-1421b	CCGGCTGTATGTGACTTCCT	20	1	mir-1421	oan	HIST	Low expression
1318	miR-3182	GTTTCTGTAGTGTAGTGG	18	2	undef	hsa	HIST&NC	Low expression
1319	miR-233	CTGAGAATGGCTGTGCGG	18	1	mir-233	cel	HIST&NC	Low expression
1320	miR-4419a	TGAGGGAGCAGACTGGAG	18	1	undef	hsa	HIST	Low expression
1321	miR-4088-3p	TTGACTCCACACTGACTCCA	20	1	undef	cin	HIST	Low expression
1322	miR-3622b-5p	AGGACAGGGAGGTAGGTG	18	3	mir-3622	hsa	HIST	Low expression
1323	miR-4091-5p	TGGCAGTGAGCTTGGAGCC	19	2	undef	cin	HIST	Low expression
1324	miR-310-3p	TATTGCACACGTCCCGGCCTCT	22	1	mir-310	dme	HIST	Low expression
1325	miR-133b-5p	CTGCTGTAGATGGGGACTC	19	1	undef	sme	HIST	Low expression
1326	miR-2320*	GATGATGTTCCCTGTGTTCCTG	22	1	mir-2320	ssc	HIST&NC	Low expression
1327	miR-4256	ACGATCTCTGATGAAGGT	18	1	undef	hsa	HIST&NC	Low expression
1328	miR-100b	AACCCGTAGATTCGAACTTGG	21	1	mir-99	pma	HIST	Low expression
1329	miR-628-5p	CTGTGACATATTTACACAGG	20	1	mir-628	hsa	HIST	Low expression
1330	miR-784	TGGCACTTACCTGTAGTAG	19	1	mir-784	cbr	HIST	Low expression
1331	miR-4850	TTATCATGACTGGAATGACAAGGAG	25	1	undef	spu	HIST	Low expression
1332	miR-199-3p	CAGTAGTCTGCACATTGGGT	20	2	undef	cin	HIST	Low expression
1333	miR-4676-5p	GGGCCAGTGTGAGAAGTGC	19	1	undef	hsa	HIST&NC	Low expression
1334	miR-92a-3p	CATTGCACTTGTCCCGGCCTGT	22	1	mir-25	dme	HIST&NC	Low expression
1335	miR-3817-5p	TCAGGGTGTGGAGTAGGAAT	20	1	mir-3817	tca	HIST	Low expression
1336	miR-2462	AAAGGGGCTGAATCTGTAG	19	2	undef	bta	HIST	Low expression
1337	miR-2325a	GTTTTGTTGTGTTTTGTT	18	1	undef	bta	HIST	Low expression
1338	miR-188-3p	CTCCCACATGCAGGGTTTGCA	21	1	mir-188	mmu	HIST&NC	Low expression
1339	miR-1456*	CGGGGTCCCGCCGTCCCCC	19	1	undef	gga	HIST	Low expression
1340	miR-1680	CAGGGACTCAGGAGGCTGA	19	2	undef	gga	HIST&NC	Low expression
1341	miR-1623	CAGGACACAGACAGCAGA	18	1	undef	gga	HIST&NC	Low expression
1342	miR-3103*	GAGGGAGGACTGTGCTGTAG	20	2	undef	mmu	HIST	Low expression
1343	miR-2127	CTGGGCGGGGAGGAGGCGGG	20	5	undef	gga	HIST&NC	Low expression
1344	miR-632	GTGTCATATTTTCCTGTGGA	20	2	mir-632	hsa cfa	HIST&NC	Low expression
1345	miR-1966	CAGGAGCTGGCTCTGGAAGATC	22	1	undef	mmu	HIST	Low expression
1346	miR-240*	GAGGATTGTGGACTGAATGC	20	2	mir-240	cel	HIST	Low expression
1347	miR-4747-5p	AGGGAACGTGAGCTTGGTTTAG	22	2	undef	hsa	HIST	Low expression
1348	miR-4332	CGACCGGCCGCCGCCGGGCGCACTT	25	2	undef	ssc	HIST&NC	Low expression
1349	miR-4784	GTGAGGGATGTGGGACTGT	19	4	undef	hsa	HIST&NC	Low expression
1350	miR-1273d	GACACATGGGTCTGAGGCTGCAG	23	1	mir-1273	hsa	HIST	Low expression
1351	miR-3759	GGTCACGTCTGCCTGGGTGTCACGC	25	1	undef	ame	HIST	Low expression
1352	miR-4006g-5p	GGAACAATGTCGGTAAGGGA	20	1	undef	cin	HIST	Low expression
1353	miR-4498	TGGCTGGCTAGGGAAGTCTG	20	1	undef	hsa	HIST	Low expression
1354	miR-4072-3p	AGAAGGACTTGACAATAAC	19	1	undef	cin	HIST	Low expression
1355	miR-5108	GGGTAGAGCACTGGATGGT	19	6	undef	mmu	HIST&NC	Low expression
1356	miR-1813	TCTCTTGGGCTGCAGAGGAGAG	22	5	undef	gga	HIST&NC	Low expression
1357	miR-4200-5p	CACCAAACTGAGGACAGAG	19	2	undef	cin	HIST&NC	Low expression
1358	miR-2368	AGAGGGAGGGACTGTATCTG	20	1	undef	bta	HIST	Low expression
1359	miR-4870	GAGTTTGTAGGCTTCTGTCTGTG	23	1	undef	bfl	HIST&NC	Low expression
1360	miR-627	GTTGATTCGTCTAAGAGAAAGAGGCA	26	1	mir-627	hsa	HIST&NC	Low expression
1361	miR-3486-5p	GATCTCTGTGTTGAATTGG	19	2	undef	sja	HIST&NC	Low expression
1362	miR-4298	CAGGGAGGAGGAGGAGGAG	19	4	undef	hsa	HIST&NC	Low expression
1363	miR-2480	ATGTATTGTCTTCTGATGC	19	3	undef	bta	HIST	Low expression
1364	miR-4174-3p	TTAAAGTTTTTGCCGTTAAAA	21	1	undef	cin	HIST	Low expression
1365	miR-502b	AATCCACCTGGGCAAGGGTTC	21	1	mir-500	bta	HIST	Low expression
1366	miR-2361	GTTTGTTTGTTTGTTTTTG	19	2	undef	bta	HIST&NC	Low expression
1367	miR-4688	TAGGGCAGCGAGGACATTGGG	21	1	undef	hsa	HIST&NC	Low expression
1368	miR-584	TCGCTGCCTGAGGACTGAG	19	1	mir-584	bta	HIST&NC	Low expression
1369	miR-4551	CGGCCGAACTTGACTATCT	19	1	undef	pma	HIST	Low expression
1370	miR-4936	CTGCATCTGTGGCTTTGCTGGTA	23	2	undef	cel	HIST	Low expression
1371	miR-466	ATACACATACACACACACACACACT	25	1	mir-467	hsa	HIST&NC	Low expression
1372	miR-1207-5p	GCAGGGAGGAGGGAGGGT	18	3	mir-1207	hsa ppy	HIST&NC	Low expression
1373	miR-1677	TCCGACCAGCTGAAGACA	18	1	mir-1677	tgu	HIST	Low expression
1374	miR-152b	TCAGTGCAACACAGAACTTTG	21	1	mir-148	pma	HIST	Low expression
1375	miR-988*	GGTGTTTTGACAATGGAGA	19	2	mir-988	dsi aae	HIST	Low expression
1376	miR-4618	TCGTCGTGAGATGTTGGGTTAAG	23	1	undef	pma	HIST	Low expression
1377	miR-4265	CTGTGACCTCAGACTCTGGGT	21	2	undef	hsa	HIST&NC	Low expression
1378	miR-3308*	TGGAATGGGACAAAATCT	18	1	undef	bmo	HIST&NC	Low expression
1379	miR-4458	AGGGAAGGTGCTGGAAGA	18	3	undef	hsa	HIST&NC	Low expression
1380	miR-3490	TCCTCTGGATCTGTGGGGAA	20	2	undef	sja	HIST	Low expression
1381	miR-2183	TTCGAATCCCCTGAACTCT	19	1	undef	mmu	HIST&NC	Low expression
1382	miR-466j	TGTGTGTTATGTGGATGTGTGTA	23	1	mir-467	mmu	HIST	Low expression
1383	miR-4545	TTCAGATCAGTTGTGGAG	18	1	undef	pma	HIST	Low expression
1384	miR-3165	GGTGGATGAATTGGACCTCA	20	1	undef	hsa	HIST	Low expression
1385	miR-763	CCAGTGTGGAAGAATCAGGATGGC	24	1	mir-763	mmu	HIST&NC	Low expression
1386	miR-1281	TCCTCCTCCTCCTCCTCCTC	20	1	mir-1281	hsa	HIST&NC	Low expression
1387	miR-665*	AGGGGCCTCTGCCTCTATCCAGGATT	26	1	mir-665	mmu	HIST	Low expression
1388	miR-765	TGGAGAGAAGAAGGAGAG	18	3	mir-765	hsa mml	HIST&NC	Low expression
1389	miR-4138-5p	TGGACTGAAGAGAGAAGA	18	3	undef	cin	HIST&NC	Low expression
1390	miR-1708	TGGGCTGTGTGGAAGAATCTT	21	1	undef	gga	HIST	Low expression
1391	miR-2013	TGGGCATGTGTAGTGGTGAG	20	1	undef	sko	HIST	Low expression
1392	miR-5119	GATCTCATCCTGGGGCTGAAGC	22	2	undef	mmu	HIST&NC	Low expression
1393	miR-1948	TTTAGAGAGCACTGGACAG	19	1	undef	mmu	HIST	Low expression
1394	miR-1186b	GGGATTGAAGGCATGCACCGC	21	4	undef	mmu	HIST&NC	Low expression
1395	miR-133b	TTTGGTCCCCTTCAACCAGCTGAA	24	2	mir-133	ssc	HIST&NC	Low expression
1396	miR-3193	TTTTGGTGGATCTGAGGAGT	20	1	undef	hsa	HIST	Low expression
1397	miR-4329	CTGAGACCCTAGAACCAAC	19	2	undef	hsa	HIST	Low expression
1398	miR-4133-3p	TCATGTTGTTCTTTGTAG	18	1	undef	cin	HIST	Low expression
1399	miR-4738-3p	TGAGACTGAGCGCCTGGCTGGA	22	1	undef	hsa	HIST	Low expression
1400	miR-680	GGGGATCTCTGAATGGGGGA	20	1	mir-680	mmu	HIST	Low expression
1401	miR-927b	TTTTTATAATTTGTAGTGCTTCTGT	25	1	undef	ame	HIST	Low expression
1402	miR-1420g	ATCCCGGCCTGCAGCAGCTCTCTG	24	1	mir-1420	oan	HIST	Low expression
1403	miR-2041*	TTTTGCTCTTAGTTCAGT	18	1	undef	nve	HIST	Low expression
1404	miR-1669	GTGGGCTCACAGCAGGAG	18	2	undef	gga	HIST&NC	Low expression
1405	miR-4753-5p	CAAGGACAAATGGAAGAGACGG	22	1	undef	hsa	HIST&NC	Low expression
1406	miR-2170	ACGTGAAATTCTGGCAGAGA	20	1	undef	sme	HIST	Low expression
1407	miR-4526	GCGAAGCAGGGCTGGGCGCG	20	1	undef	hsa	HIST	Low expression
1408	miR-2424	ACAGATCTTTGGTAATCTGATGG	23	2	mir-2424	bta	HIST&NC	Low expression
1409	miR-2744	TTCTGGAGTCCTGAGCTAC	19	1	undef	bmo	HIST	Low expression
1410	miR-4900b	TAGTTGCCTGGGGAAGAAG	19	2	mir-4900	bfl	HIST	Low expression
1411	miR-1842	TGGCTCTGCGAGGTCGGCTCAA	22	1	mir-1842	cfa	HIST	Low expression
1412	miR-1933-3p	CCAGGACTATGAGCATGTGACTAT	24	1	undef	mmu	HIST	Low expression
1413	miR-467f	TATATACACACACATACATACA	22	1	mir-467	mmu	HIST&NC	Low expression
1414	miR-153b	TTGCATAGTCACAAAAGAG	19	1	mir-153	dre	HIST	Low expression
1415	miR-1624	ACAGCCGCTGCAGGGAGCA	19	1	undef	gga	HIST	Low expression
1416	miR-355	TTTGTTTTGCTTGAACTTATG	21	1	mir-355	cel	HIST	Low expression
1417	miR-3082-5p	CAGAGTGTGTGTGTCTGTGTGGA	23	1	undef	mmu	HIST&NC	Low expression
1418	miR-1897-5p	GTTTGGATGGAAGAAAGAAGGGGG	24	2	undef	mmu	HIST	Low expression
1419	miR-5125	TTCTGCCTGGGATTTCCTTGAATA	24	1	undef	mmu	HIST	Low expression
1420	miR-966-5p	TGTAGTTTGGGCTGTGTGT	19	3	undef	dme	HIST	Low expression
1421	miR-181a-1*	ACCATCGACCGTTGACTGTACA	22	1	mir-181	xtr	HIST	Low expression
1422	miR-252*	TTACCTACTCCCACTCTGC	19	1	mir-252	cel	HIST&NC	Low expression
1423	miR-2388	CTGGAGGAGCTGGAGCTGA	19	1	undef	bta	HIST&NC	Low expression
1424	miR-4922	TAATTATAACTGTTCTGTTCTCAG	24	1	mir-4922	cel	HIST	Low expression
1425	miR-281	TGTCTAATGGACTTGCTGACTCTGTG	26	1	mir-46	nlo	HIST&NC	Low expression
1426	miR-3537	GGTTAGTGCTGTAGGCTGGGGGCTTC	26	2	undef	gga	HIST&NC	Low expression
1427	miR-1934*	AGAGCCGGTGGGGCTGGGGA	20	2	undef	mmu	HIST	Low expression
1428	miR-4253	AAGGCATGTGTCCAGGCGGT	20	1	undef	hsa	HIST&NC	Low expression
1429	miR-3745	CGGGTGCGCCCCCCGGGCCGCG	22	1	undef	ame	HIST&NC	Low expression
1430	miR-3895-5p	TTGAGTTGTTTAGAGTGG	18	1	undef	tca	HIST	Low expression
1431	miR-3928	GGCAGGACCTAGGAGCTTCGGGC	23	1	undef	hsa	HIST	Low expression
1432	miR-23a*	GGGGTTCCTGGGGATGGGATT	21	1	mir-23	hsa	HIST	Low expression
1433	miR-4164-3p	TCTTTTGTTATTGTCTCTGT	20	1	undef	cin	HIST&NC	Low expression
1434	miR-4006c-5p	TGGAACCTGTAAATATGC	18	2	undef	cin	HIST&NC	Low expression
1435	miR-5110	AGTACGGTAGAGGGTGGTGGAAT	23	1	undef	mmu	HIST&NC	Low expression
1436	miR-2777	AGGGACTGTGCCTGGGTA	18	1	undef	bmo	HIST	Low expression
1437	miR-4039-5p	GAATGAAGACTGTAGGCTAT	20	1	undef	cin	HIST	Low expression
1438	miR-87a-3p	TGGCTAAGATCAAGTGTA	18	1	undef	sme	HIST	Low expression
1439	miR-3654	GACGGAGCAAGCTGTGGAG	19	2	undef	hsa	HIST&NC	Low expression
1440	miR-28c	AGGAGCTCACAGTCTATTGA	20	1	undef	mmu	HIST&NC	Low expression
1441	miR-2440	CTGTGATGAGACTCTGGA	18	1	undef	bta	HIST&NC	Low expression
1442	miR-761	GCAGCTGGGGAAACTGAGTC	20	1	mir-761	mdo	HIST	Low expression
1443	miR-1327	TGAGAAAGGCTGTTAGAATGATG	23	1	undef	oan	HIST	Low expression
1444	miR-181	AACATTCAACGCTGTCGGAAAA	22	1	undef	cin	HIST	Low expression
1445	miR-954-5p	TCTCTGTGTTGGTGTGTGT	19	1	undef	dme	HIST	Low expression
1446	miR-2040a	TTTGTCTGTAACTGACGCTGAGGAG	25	1	mir-2040	nve	HIST	Low expression
1447	miR-1419d	CCAGTGCTGCGACTCTCATCA	21	1	mir-1419	oan	HIST	Low expression
1448	miR-4000d-5p	TGGAACTTGCACAGAAGGC	19	1	mir-4000	cin	HIST&NC	Low expression
1449	miR-2551	AAAGCTCGTTTGATTTTGA	19	1	undef	dps	HIST	Low expression
1450	miR-1684	AAGATGATCGAGGACCTGGAGCTCT	25	1	undef	gga	HIST	Low expression
1451	miR-3081*	ACTGGACTTGGAGGCGGGAGGC	22	1	undef	mmu	HIST&NC	Low expression
1452	miR-2413	TGGGAACTCTAGGGGGACTGCCGGT	25	1	undef	bta	HIST	Low expression
1453	miR-4276	GCTCAGGACTCATTGATGC	19	1	undef	hsa	HIST	Low expression
1454	miR-449b	GGGATTTTGTTAGCTGGC	18	2	mir-449	gga mmu	HIST&NC	Low expression
1455	miR-5112	ATAGCTCAGTCGGTAGAGCAT	21	2	undef	mmu	HIST&NC	Low expression
1456	miR-589	TGAGAACTTGTTGACAGAG	19	1	mir-589	cfa	HIST	Low expression
1457	miR-265	TGGGAGGAAGGGTTGTAG	18	2	undef	cel	HIST&NC	Low expression
1458	miR-4017-3p	TAAGTGATGTATGGCTAGCA	20	1	mir-4017	cin	HIST&NC	Low expression
1459	miR-1748	ACTGCAGAGTCTTTGGGTCAGCTGA	25	1	undef	gga	HIST&NC	Low expression
1460	miR-4905	ATGTGGAAGATTTTAGAA	18	1	undef	bfl	HIST	Low expression
1461	miR-4442	GCCGGACACAGCGGGAGGCC	20	1	undef	hsa	HIST&NC	Low expression
1462	miR-4701-3p	ATGGGTGAGAGGGTGTGTG	19	1	undef	hsa	HIST&NC	Low expression
1463	miR-143	TGAGATGAAGCACTGTAGCT	20	1526043	mir-143	rno mmu xtr pma	HIST&NC
1464	miR-146b	TGAGAACTGAATTCCATAGGCTGT	24	91033	mir-146	rno gga ssc dre xtr	HIST&NC
1465	miR-200c	TAATACTGCCGGGTAATGATGGA	23	46586	mir-8	hsa rno bfl mml dre mdo	HIST&NC
1466	miR-383	CAGATCAGAAGGTGACTGTGG	21	87113	mir-383	hsa rno mmu oan	HIST&NC
1467	miR-148b-3p	TCAGTGCATCACAGAACTTTGT	22	35599	mir-148	rno	HIST&NC
1468	miR-664-2*	CTGGCTGGGGAAAATGATTGGA	22	23574	mir-664	rno	HIST&NC
1469	miR-200b	TAATACTGCCTGGTAATGATGA	22	31806	mir-8	rno gga mmu bfl pma bta	HIST&NC
1470	miR-381	TATACAAGGGCAAGCTCTCTGT	22	13118	mir-154	hsa rno	HIST&NC
1471	miR-221*	ACCTGGCATACAATGTAGATTTCTGT	26	20347	mir-221	hsa rno mmu oan	HIST&NC
1472	miR-101b	TACAGTACTGTGATAGCTGA	20	18333	mir-101	rno dre	HIST&NC
1473	miR-340-5p	TTATAAAGCAATGAGACTGATT	22	13028	mir-340	rno	HIST&NC
1474	miR-434*	AGCTCGACTCATGGTTTGAACC	22	7774	mir-434	rno	HIST&NC
1475	miR-338*	AACAATATCCTGGTGCTGAGT	21	6827	mir-338	rno	HIST&NC
1476	miR-328a	CTGGCCCTCTCTGCCCTTCCGT	22	7647	mir-328	rno	HIST&NC
1477	miR-1	TGGAATGTAAAGAAGTATGT	20	8865	mir-1	egr cel crm rno cte sko	HIST&NC
1478	miR-127*	CTGAAGCTCAGAGGGCTCTGA	21	8882	mir-127	rno mmu	HIST&NC
1479	miR-582*	AACCTGTTGAACAACTGAACCC	22	5217	mir-582	rno	HIST&NC
1480	miR-330*	CAAAGCACAGGGCCTGCAGAGA	22	14793	mir-330	rno	HIST&NC
1481	miR-330	TCTCTGGGCCTGTGTCTTAGGA	22	9556	mir-330	rno	HIST&NC
1482	miR-338	TCCAGCATCAGTGATTTTGTTGA	23	3546	mir-338	rno	HIST&NC
1483	miR-532-5p	CATGCCTTGAGTGTAGGACTGT	22	2809	mir-188	hsa rno	HIST&NC
1484	miR-128-2*	GGGGGCCGATGCACTGTAAGAGA	23	5862	mir-128	rno mmu	HIST&NC
1485	miR-380*	TATGTAGTATGGTCCACATCT	21	1957	mir-379	hsa rno	HIST&NC
1486	miR-125b*	ACAAGTCAGGCTCTTGGGACC	21	3647	mir-125	rno	HIST&NC
1487	miR-341	TCGGTCGATCGGTCGGTCGGT	21	4459	mir-341	rno	HIST&NC
1488	miR-325-3p	TTTATTGAGCACCTCCTATCA	21	2148	mir-325	rno	HIST&NC
1489	miR-423*	TGAGGGGCAGAGAGCGAGACTTTT	24	2022	mir-423	rno	HIST&NC
1490	miR-3559-5p	TGACAGACTTAGTACTACATGA	22	1301	undef	rno	HIST&NC
1491	miR-409-3p	GAATGTTGCTCGGTGAACCCCT	22	2267	mir-154	rno mmu oar	HIST&NC
1492	miR-496	AGTATTACATGGCCAATCTCC	21	966	mir-154	hsa rno	HIST&NC
1493	miR-337*	CGGCGTCATGCAGGAGTTGATT	22	2110	mir-337	rno	HIST&NC
1494	miR-322	CAGCAGCAATTCATGTTTTGGA	22	1108	mir-322	rno	HIST&NC
1495	miR-323	CACATTACACGGTCGACCTCT	21	1738	mir-154	rno ssc	HIST&NC
1496	miR-10b	TACCCTGTAGAACCGAATTTGT	22	890	mir-10	rno sme mmu gga bfl mdo	HIST&NC
1497	miR-335	TCAAGAGCAATAACGAAAAATG	22	1830	mir-335	rno ssc	HIST&NC
1498	miR-344b-1-3p	GATATAACCAAAGCCCGACTGT	22	781	mir-344	rno	HIST&NC
1499	miR-135b	TATGGCTTTTCATTCCTATGTGA	23	1077	mir-135	fru rno pma mdo	HIST&NC
1500	miR-664	TATTCATTTACTCCCCAGCCTAC	23	1948	mir-664	hsa rno eca cfa mml bta	HIST&NC
1501	miR-329	AACACACCCAGCTAACCTTTTT	22	1003	mir-329	rno	HIST&NC
1502	miR-667*	CGGTGCTGGTGGAGCAGTGAGCACG	25	835	mir-667	rno mmu	HIST&NC
1503	miR-342-3p	TCTCACACAGAAATCGCACCCGT	23	560	mir-342	rno	HIST&NC
1504	miR-374	ATATAATACAACCTGCTAAGT	21	918	mir-374	rno	HIST&NC
1505	miR-379*	TATGTAACATGGTCCACTAAC	21	494	mir-379	hsa rno	HIST&NC
1506	miR-539*	CATACAAGGGTAATTTCTTTT	21	1006	mir-154	rno	HIST&NC
1507	miR-551b	GCGACCCATACTTGGTTTCAGT	22	505	mir-551	hsa rno	HIST&NC
1508	miR-448	TTGCATATGTAGGATGTCCCA	21	876	mir-448	hsa rno	HIST&NC
1509	miR-299*	TATGTGGGACGGTAAACCGC	20	723	mir-299	rno mmu	HIST&NC
1510	miR-340-3p	TCCGTCTCAGTTACTTTATAGC	22	674	mir-340	rno mmu	HIST&NC
1511	miR-485*	CATACACGGCTCTCCTCTCTTC	22	425	mir-485	rno mmu	HIST&NC
1512	miR-342-5p	AGGGGTGCTATCTGTGATTGAGG	23	812	mir-342	hsa rno	HIST&NC
1513	miR-325-5p	CCTAGTAGGTGCTCAGTAAGT	21	543	mir-325	rno	HIST&NC
1514	miR-374*	CTTAGCACGTTGTATTATTATT	22	343	mir-374	rno	HIST&NC
1515	miR-200a*	CATCTTACCGGACAGTGCTGGAG	23	868	mir-8	rno mmu	HIST&NC
1516	miR-181b-1*	CTCACTGAACAATGAATGC	19	398	mir-181	rno mmu	HIST&NC
1517	miR-361*	CCCCCAGGTGTGATTCTGATTCGT	24	406	mir-361	rno mmu	HIST&NC
1518	miR-324-3p	CCACTGCCCCAGGTGCTGCTGG	22	943	mir-324	hsa rno mmu	HIST&NC
1519	miR-324-5p	CGCATCCCCTAGGGCATTGGTGT	23	631	mir-324	rno	HIST&NC
1520	miR-27b*	AGAGCTTAGCTGATTGGTGAAC	22	311	mir-27	rno mmu ssc	HIST&NC
1521	miR-92b*	AGGGACGGGACGCGGTGCAGTGTT	24	578	mir-25	hsa rno	HIST&NC
1522	miR-345-3p	CCTGAACTAGGGGTCTGGAG	20	692	mir-345	rno mmu ssc bta	HIST&NC
1523	miR-212*	ACCTTGGCTCTAGACTGCTTACTG	24	276	mir-132	rno	HIST&NC
1524	miR-411*	TATGTAACACGGTCCACTAACC	22	350	mir-379	rno mmu	HIST&NC
1525	miR-181a-2*	ACCACCAACCGTTGACTGTACC	22	237	mir-181	hsa rno	HIST&NC
1526	miR-450a	TTTTGCGATGTGTTCCTAATGT	22	485	mir-450	hsa rno ppy cfa	HIST&NC
1527	miR-653	TTGAAACATTCTCTACTGAACC	22	230	mir-653	rno	HIST&NC
1528	miR-667	TGACACCTGCCACCCAGCCCAAG	23	508	mir-667	rno mmu	HIST&NC
1529	miR-497	CAGCAGCACACTGTGGTTTGT	21	442	mir-497	hsa rno	HIST&NC
1530	miR-540	AGGTCAGAGGTCGATCCTGGGC	22	214	mir-540	rno	HIST&NC
1531	miR-351	TCCCTGAGGAGCCCTTTGAGCC	22	339	mir-351	rno mmu	HIST&NC
1532	miR-382*	AATCATTCACGGACAACACTT	21	148	mir-154	rno mmu	HIST&NC
1533	miR-25*	AGGCGGAGACACGGGCAATTGCT	23	228	mir-25	rno	HIST&NC
1534	miR-329*	AGAGGTTTTCTGGGTCTCTGTTTC	24	702	mir-329	rno mmu	HIST&NC
1535	miR-879*	CTTATGGCTTCAAGCTTTCGG	21	237	mir-879	rno mmu	HIST&NC
1536	miR-222*	TCAGTAGCCAGTGTAGATCCTG	22	148	mir-221	hsa rno mmu	HIST&NC
1537	miR-421	ATCAACAGACATTAATTGGGCGC	23	268	mir-95	hsa rno ssc cfa	HIST&NC
1538	miR-345-5p	TGCTGACCCCTAGTCCAGTGC	21	221	mir-345	rno mmu	HIST&NC
1539	miR-3545-3p	TTGAACTGTTAAGAACCACTGG	22	187	mir-203	hsa rno	HIST&NC
1540	miR-346	TGTCTGCCTGAGTGCCTGCCTCT	23	195	mir-346	rno	HIST&NC
1541	miR-150*	CTGGTACAGGCCTGGGGGACA	21	187	mir-150	hsa rno mmu	HIST&NC
1542	miR-137*	ACGGGTATTCTTGGGTGGATAAT	23	265	mir-137	rno mmu	HIST&NC
1543	miR-425*	CATCGGGAATATCGTGTCCGC	21	247	mir-425	hsa rno oan	HIST&NC
1544	miR-134*	CTGTGGGCCACCTAGTCACCA	21	135	mir-134	rno mmu	HIST&NC
1545	miR-741-3p	AAAGATGCCACGCTATGTAGA	21	103	undef	rno	HIST&NC
1546	miR-148b-5p	GAAGTTCTGTTATACACTCAGG	22	142	mir-148	rno	HIST&NC
1547	miR-17-1-3p	ACTGCAGTGAAGGCACTTGTGG	22	145	mir-17	rno	HIST&NC
1548	miR-344b-5p	AGTCAGGCTGCTGGTTATATTCC	23	187	mir-344	rno	HIST&NC
1549	miR-350	TTCACAAAGCCCATACACTTTC	22	250	mir-350	rno mmu	HIST&NC
1550	miR-3559-3p	ATGTAGTACTGAGTCTGTCGTG	22	219	undef	rno	HIST&NC
1551	miR-145*	ATTCCTGGAAATACTGTTCT	20	245	mir-145	hsa rno mmu oan	HIST&NC
1552	miR-99a*	CAAGCTCGTTTCTATGGGTCTGT	23	240	mir-99	rno mmu bta	HIST&NC
1553	miR-702-3p	TGCCCACCCTTTACCCCACTCCAGT	25	157	mir-702	rno	HIST&NC
1554	miR-370*	CAGGTCACGTCTCTGCAGTTACAC	24	92	mir-370	rno mmu	HIST&NC
1555	miR-376a*	GGTAGATTCTCCTTCTATGAGT	22	372	mir-368	hsa rno ssc mmu	HIST&NC
1556	miR-493	TGAAGGTCTACTGTGTGCCAGG	22	198	mir-493	hsa rno	HIST&NC
1557	miR-217	TACTGCATCAGGAACTGACTGGA	23	136	mir-217	tgu rno mmu gga mml	HIST&NC
1558	miR-33*	CAATGTTTCCACAGTGCATCA	21	101	mir-33	rno	HIST&NC
1559	miR-135a*	TGTAGGGATGGAAGCCATGAAT	22	247	mir-135	tgu rno oan	HIST&NC
1560	miR-455*	GCAGTCCACGGGCATATACACC	22	174	mir-455	rno	HIST&NC
1561	miR-190b	TGATATGTTTGATATTAGGTTG	22	102	mir-190	rno dre oan	HIST&NC
1562	miR-204*	GCTGGGAAGGCAAAGGGACGT	21	100	mir-204	rno mmu oan	HIST&NC
1563	miR-501*	AATGCACCCGGGCAAGGATTTGG	23	85	mir-500	rno	HIST&NC
1564	miR-98*	CTATACAACTTACTACTTTCCT	22	101	let-7	rno mmu	HIST&NC
1565	miR-505	CGTCAACACTTGCTGGTTTCCT	22	260	mir-505	hsa rno ssc	HIST&NC
1566	miR-541*	TGGCGAACACAGAATCCATACT	22	76	mir-541	rno mmu	HIST&NC
1567	miR-323*	AGGTGGTCCGTGGCGCGTTCGC	22	77	mir-154	rno	HIST&NC
1568	miR-344a-3p	TGATCTAGCCAAAGCCTGACCGT	23	86	mir-344	rno	HIST&NC
1569	miR-322*	AAACATGAAGCGCTGCAACA	20	210	mir-322	rno mmu	HIST&NC
1570	miR-344b-2-3p	GGTATAACCAAAGCCCGACTGA	22	121	mir-344	rno	HIST&NC
1571	miR-141*	TCCATCTTCCAGTGCAGTGTTGG	23	99	mir-8	rno mmu	HIST&NC
1572	miR-337	TCAGCTCCTATATGATGCCTTT	22	91	mir-337	rno	HIST&NC
1573	miR-3586-3p	TACTAGACTGAGGCTCCTTGA	21	49	mir-28	rno	HIST&NC
1574	miR-412*	TGGTCGACCAGCTGGAAAGT	20	106	mir-412	rno	HIST&NC
1575	miR-673*	TCCGGGACTGAGTTCTGTGC	20	107	mir-673	rno	HIST&NC
1576	miR-503*	GGAGTATTGTTTCCGCTGCCTGGA	24	151	mir-503	rno	HIST&NC
1577	miR-215	ATGACCTATGATTTGACAGACA	22	60	mir-192	rno mmu bta	HIST&NC
1578	miR-494	TGAAACATACACGGGAAACCTCT	23	75	mir-154	hsa rno	HIST&NC
1579	miR-339-5p	TCCCTGTCCTCCAGGAGCTCACG	23	64	mir-339	rno	HIST&NC
1580	let-7f-1*	CTATACAATCTATTGCCTTCCT	22	72	let-7	hsa rno oan	HIST&NC
1581	miR-673	CTCACAGCTCCGGTCCTTGGA	21	67	mir-673	rno	HIST&NC
1582	miR-483	AAGACGGGAGAAGAGAAGGGA	21	118	mir-483	rno mmu	HIST&NC
1583	miR-195*	CCAATATTGGCTGTGCTGCTCCA	23	63	mir-15	rno mmu	HIST&NC
1584	miR-672*	ACACACAGTCGCCATCTTCGA	21	44	mir-672	rno	HIST&NC
1585	miR-135b*	ATGTAGGGCTAAAAGCCATGGGC	23	115	mir-135	rno oan	HIST&NC
1586	miR-543*	AAACATTCGCGGTGCACTTCT	21	78	mir-329	rno mmu	HIST&NC
1587	miR-489	ATGACATCACATATATGGCAGC	22	45	mir-489	rno mmu	HIST&NC
1588	miR-153*	GTCATTTTTGTGATGTTGCAG	21	63	mir-153	rno	HIST&NC
1589	miR-377	ATCACACAAAGGCAACTTTTGG	22	108	mir-154	hsa rno	HIST&NC
1590	miR-331	GCCCCTGGGCCTATCCTAGAAA	22	108	mir-331	rno	HIST&NC
1591	miR-547	ATTGGTACTTCTTTAAGTGAGA	22	28	mir-547	rno	HIST&NC
1592	miR-881	TAACTGTGGCATTTCTGAATAGA	23	41	mir-881	rno	HIST&NC
1593	miR-1193-3p	TAGGTCACCCGTTTTACTATCC	22	39	mir-1193	rno mmu	HIST&NC
1594	miR-3547	TGAGCACCACCCCTCTCTCAGT	22	31	undef	rno	HIST&NC
1595	miR-205	TCCTTCATTCCACCGGAGTCTGT	23	56	mir-205	rno mmu oan	HIST&NC
1596	miR-129-1*	AAGCCCTTACCCCAAAAAG	19	20	mir-129	rno	HIST&NC
1597	miR-223	TGTCAGTTTGTCAAATACCCCA	22	44	mir-223	hsa rno	HIST&NC
1598	miR-505*	GGGAGCCAGGAAGTATTGATGTT	23	49	mir-505	hsa rno	HIST&NC
1599	miR-183*	TGAATTACCGAAGGGCCATAAA	22	66	mir-183	rno mmu	HIST&NC
1600	miR-3594-5p	CCCAGGGCAGAGCAGTGTGA	20	64	undef	rno	HIST&NC
1601	miR-24-1*	GTGCCTACTGAGCTGATATCAGT	23	55	mir-24	hsa rno mmu	HIST&NC
1602	miR-3577	TCTGTCCCTCTTGGCCCTTAGT	22	18	undef	rno	HIST&NC
1603	miR-146b*	GCCCTAGGGACTCAGTTCTGGT	22	43	mir-146	rno mmu	HIST&NC
1604	miR-511*	AATGTGTAGCAAAAGACAGGA	21	16	mir-511	rno	HIST&NC
1605	miR-93*	ACTGCTGAGCTAGCACTTCCCG	22	24	mir-17	hsa rno	HIST&NC
1606	miR-194*	CCAGTGGGGCTGCTGTTATCTGT	23	28	mir-194	hsa rno	HIST&NC
1607	miR-874*	CGGCCCCACGCACCAGGGTAAGA	23	27	mir-874	rno mmu	HIST&NC
1608	miR-497*	CAAACCACACTGTGGTGTTGGA	22	25	mir-497	hsa rno mmu	HIST&NC
1609	miR-351*	GGTCAAGAGGCGCCTGGGAAC	21	16	mir-351	rno	HIST&NC
1610	miR-466c	TGTGATGTGTGTATGTATATGT	22	30	mir-467	rno	HIST&NC
1611	miR-421*	ATCAACAGACATTAATTGGG	20	12	mir-95	rno	HIST&NC
1612	miR-224	CAAGTCACTAGTGGTTCCGTTT	22	13	mir-224	rno ssc	HIST&NC
1613	miR-3583-3p	CCTGACTTCTCTCTTCATGCAG	22	36	undef	rno	HIST&NC
1614	miR-3542	AAGGCTCTTCTTTCCTTGCAG	21	26	undef	rno	HIST&NC
1615	miR-664-1*	CTGGCTGGGGAAAAGGATTGGA	22	30	mir-664	rno	HIST&NC
1616	miR-665	ACCAGGAGGCTGAGGTCCCTTAC	23	24	mir-665	rno mmu	HIST&NC
1617	miR-3573-5p	AGGGGCAGTGATAGAAAGGAGA	22	14	undef	rno	HIST&NC
1618	miR-1193-5p	ATGGTAAACCGGTGACGTGC	20	10	mir-1193	rno	HIST&NC
1619	miR-653*	TTCACTGGGGTTTGTTTCACT	21	6	mir-653	rno	HIST&NC	Low expression
1620	miR-298*	GAGGAACTAGCCTTCTCTCTGC	22	25	mir-298	rno mmu	HIST&NC
1621	miR-876	TGGATTTCTCTGTGAATCACC	21	7	mir-876	rno	HIST&NC	Low expression
1622	miR-448*	AACATCCTGCATAGTGCTGCCA	22	5	mir-448	rno	HIST&NC	Low expression
1623	miR-331*	GTCTTGTTTGGGTTTGTT	18	11	mir-331	rno	HIST&NC
1624	miR-107*	AGCTTCTTTACAGTGTTGCCTTG	23	9	mir-103	rno mmu oan	HIST&NC	Low expression
1625	miR-376c*	GTGGATATTCCTTCTATG	18	9	mir-368	rno	HIST&NC	Low expression
1626	miR-764*	GAGGAGGCCATAGTGGCAACTGT	23	15	mir-764	rno	HIST&NC
1627	miR-214	ACAGCAGGCACAGACAGGCAG	21	43	mir-214	hsa rno gga	HIST&NC
1628	miR-34a*	AATCAGCAAGTATACTGCCCTA	22	6	mir-34	hsa rno	HIST&NC	Low expression
1629	miR-764	GGTGCTCACATGTCCTCCTCCA	22	5	mir-764	rno	HIST&NC	Low expression
1630	miR-192*	CTGCCAGTTCCATAGGTCACAG	22	5	mir-192	rno	HIST	Low expression
1631	miR-466b-1*	ATACATACACACACACATACA	21	10	mir-467	rno	HIST
1632	miR-210*	AGCCACTGCCCACAGCACACT	21	6	mir-210	rno	HIST&NC	Low expression
1633	miR-186*	GCCCAAAGGTGAATTTTTTGG	21	7	mir-186	hsa rno	HIST&NC	Low expression
1634	miR-3552	AGGCTGCAGGCCCACTTCCCT	21	12	undef	rno	HIST&NC
1635	miR-466b	TTGTCTGTGTGTATGTCCATGT	22	7	mir-467	rno	HIST&NC	Low expression
1636	miR-412	TACTTCACCTGGTCCACTAGCC	22	19	mir-412	hsa rno	HIST&NC
1637	miR-18a*	ACTGCCCTAAGTGCTCCTTCT	21	13	mir-17	hsa rno mmu	HIST&NC
1638	miR-201*	TGAACAGCGCCTTTCTGTGTAGC	23	6	mir-743	rno	HIST&NC	Low expression
1639	miR-105	TCAAGTGCTCAGATGTCTGTGG	22	3	mir-105	rno	HIST&NC	Low expression
1640	miR-450a*	ATTGGGAACATTTTGCAT	18	3	mir-450	rno	HIST&NC	Low expression
1641	miR-181b-2*	CTCACTGGTCAATGAATGC	19	10	mir-181	rno mmu	HIST&NC
1642	miR-339-3p	TGAGCGCCTCGACGACAGAGCCAT	24	10	mir-339	rno	HIST&NC
1643	miR-3572	TTACACTTGCCCTTTTTTCCCCA	23	5	mir-3572	rno	HIST&NC	Low expression
1644	miR-381*	AGCGAGGTTGCCCTTTGTATATT	23	5	mir-154	rno mmu	HIST&NC	Low expression
1645	miR-496*	AGGTTGTCCATGGTGTGTTCA	21	6	mir-154	rno mmu	HIST&NC	Low expression
1646	miR-3562	TTTGGGGCAGTGGCTGGATGG	21	16	undef	rno	HIST&NC
1647	miR-301a*	GCTCTGACTTTATTGCACTACT	22	8	mir-130	rno mmu	HIST&NC	Low expression
1648	miR-666	AGCGGGCACGGCTGTGAGA	19	10	mir-666	rno	HIST&NC
1649	miR-146a*	ACCTGTGAAGTTCAGTTCTTTAG	23	5	mir-146	rno mmu	HIST&NC	Low expression
1650	miR-365*	GAGGGACTTATCAGGGGGGGC	21	4	mir-365	hsa rno	HIST&NC	Low expression
1651	miR-152*	AGGTTCTGTGATACACTCCGA	21	3	mir-148	rno mmu	HIST&NC	Low expression
1652	miR-2964	AGATGTCCAGCCACAATTCTCG	22	6	mir-2964	tgu rno gga	HIST&NC	Low expression
1653	miR-216b-3p	CACACTTACTTGTAGAGATTCT	22	2	mir-216	rno	HIST	Low expression
1654	miR-3594-3p	CACACCGCCTCTGCCCGCTAGTT	23	5	undef	rno	HIST	Low expression
1655	miR-466b-2*	ATATACATACACACATACACA	21	13	mir-467	rno	HIST&NC
1656	miR-3561-3p	TTACAGGGCAGCACTCAGA	19	2	undef	rno	HIST&NC	Low expression
1657	miR-880	TACTCCATTCATTCTGAGTAG	21	3	mir-880	rno	HIST	Low expression
1658	miR-544	ATTCTGCATTTTTAGCAAGCT	21	6	mir-544	hsa rno	HIST&NC	Low expression
1659	miR-181d*	CCACCGGGGGATGAATGTCA	20	3	mir-181	rno	HIST	Low expression
1660	miR-3541	TCCCTCCCCCTCACTGCACATA	22	2	undef	rno	HIST	Low expression
1661	miR-297	TGTATGTGTGTGTATGTATG	20	4	mir-297	rno mml	HIST&NC	Low expression
1662	miR-218a-1*	AACATGGTTCCGTCAAGCAA	20	3	mir-218	rno	HIST	Low expression
1663	miR-3593-3p	CTTCAACCTTAAGGGGGCCTCTTTT	25	4	undef	rno	HIST&NC	Low expression
1664	miR-3585-3p	TGAACGGCCCTTGTTGTGAGG	21	2	mir-506	rno	HIST&NC	Low expression
1665	miR-2985	TGTTATAGTATCCCACCTACCC	22	7	mir-2985	tgu rno	HIST&NC	Low expression
1666	miR-3563-3p	GTATGTGGGACGGTAAACA	19	7	mir-299	rno	HIST&NC	Low expression
1667	miR-652*	CAACCCTAGGAGGGGGTGCCATTCA	25	7	mir-652	rno mmu	HIST&NC	Low expression
1668	miR-3585-5p	TTCACAAGAAGGTGTCTTTCAT	22	2	mir-506	rno	HIST	Low expression
1669	miR-20b-3p	TACTGCAGTGTGAGCACTTCTGG	23	3	mir-17	rno	HIST	Low expression
1670	miR-463	TGATAGACGCCAATTTGGGTAGA	23	4	mir-463	rno	HIST&NC	Low expression
1671	miR-487b*	AGTGGTTATCCCTGTCCTCTTC	22	2	mir-154	rno	HIST&NC	Low expression
1672	miR-202*	AGAGGCGTAGTCGATGGGAAA	21	2	mir-202	rno gga	HIST	Low expression
1673	miR-96*	AATCATGTGCAGTGCCAATAT	21	3	mir-96	hsa rno	HIST&NC	Low expression
1674	miR-3544	AACTCCTGCATGACGCCGTTCCC	23	1	undef	rno	HIST&NC	Low expression
1675	miR-466d	TGTGTGTGTATGTCTGTGT	19	1	mir-467	rno	HIST	Low expression
1676	miR-295*	AAAGTGCTACTACTTTTGGGTGTAG	25	1	mir-290	rno	HIST	Low expression
1677	miR-743a	GAAAGACGCCAAACTGGGTAGA	22	2	mir-743	rno	HIST&NC	Low expression
1678	miR-3584-5p	GGGAAGAGTCTGAGGAGGCG	20	2	undef	rno	HIST&NC	Low expression
1679	miR-133a*	AGCTGGTAAAATGGAACCAAAT	22	2	mir-133	rno	HIST&NC	Low expression
1680	miR-291b	AAAGTGCATCCATTTTGTTAGT	22	1	mir-290	rno	HIST	Low expression
1681	miR-3583-5p	AGCATGAAGAGTTCAGATCACGT	23	3	undef	rno	HIST&NC	Low expression
1682	miR-544*	TTGTTAAAAAGCAGATTCTGA	21	3	mir-544	rno	HIST&NC	Low expression
1683	miR-3065-3p	TCAGCACCAGGATATTGTTGGGA	23	2	mir-3065	hsa rno	HIST&NC	Low expression
1684	miR-217*	ATCAGTTCCTAATGCATTGCCT	22	1	mir-217	rno	HIST&NC	Low expression
1685	miR-802*	ACGGAGAGTCTTTGTCACTCA	21	2	mir-802	rno mmu	HIST&NC	Low expression
1686	miR-3564	TGGGAAATGCAAAGAGGGAAG	21	1	undef	rno	HIST	Low expression
1687	miR-3557-3p	AAAGGACTGGAGTCAGGA	18	2	mir-378	rno	HIST&NC	Low expression
1688	miR-598-5p	GCGGTGATGCCGATGGTGCGA	21	3	mir-598	rno	HIST	Low expression
1689	miR-3566	CTGCCTAACAATGAACTACCA	21	1	undef	rno	HIST	Low expression
1690	miR-3558-5p	CCATAGAAGTCATCCCACAGTGCC	24	1	undef	rno	HIST	Low expression
1691	miR-3597-5p	TTCGGTTATCTAGCTGTAT	19	4	mir-9	rno	HIST&NC	Low expression
1692	miR-293	ACTCAAACTGTGTGACACTTT	21	2	mir-290	rno	HIST&NC	Low expression
1693	miR-208b-5p	AAGCTTTTTGCTCGTCTTA	19	1	mir-208	rno	HIST&NC	Low expression
1694	miR-770*	GTGGGCTAGACGTGGAGG	18	2	mir-770	rno	HIST&NC	Low expression
1695	miR-702-5p	GTGAGTGGGGTGGTTGGCATGA	22	8	mir-702	rno	HIST&NC	Low expression
1696	miR-347	TTCGTCCCATCTGGGTCGCCA	21	3	undef	rno	HIST&NC	Low expression
1697	miR-3569	GGAGGACAGCAGACTCAGGTCA	22	2	undef	rno	HIST	Low expression
1698	miR-3550	CCGAGCCCATCCCTGCCCTAGTT	23	3	undef	rno	HIST&NC	Low expression
1699	miR-666*	GGCTGCAGCGTGATCGCCTGCTCTAGA	27	1	mir-666	rno	HIST&NC	Low expression
1700	miR-352	GGTAGTAGGTTGTATAGTA	19	14	undef	rno	HIST&NC
Note:# miRNAs with very low expression (less than 10 copies) were marked.
（2） Known miRNAs identified in NC library:
No	miRNA name	Sequence	Length	Read count	miRNA family	miRNA Orthologs	Co-expression/Specific	Mark for Low expression
1	miR-9a-5p	TCTTTGGTTATCTAGCTGTATGA	23	1416714	mir-9	dme	HIST&NC
2	miR-378	ACTGGACTTGGAGTCAGAAGGC	22	1452656	mir-378	hsa ppy cfa	HIST&NC
3	let-7f	TGAGGTAGTAGATTGTATAGTT	22	1414639	let-7	hsa	HIST&NC
4	let-7c	TGAGGTAGTAGGTTGTATGGTT	22	1205674	let-7	hsa odi pma csa cin	HIST&NC
5	miR-143	TGAGATGAAGCACTGTAGCT	20	1139450	mir-143	rno mmu xtr pma	HIST&NC
6	miR-9	TCTTTGGTTATCTAGCTGTATG	22	751193	mir-9	egr sko bma xtr	HIST&NC
7	let-7	TGAGGTAGTAGGTTGTATAGTT	22	490827	let-7	cel aga spu	HIST&NC
8	miR-30a	TGTAAACATCCTCGACTGGAAGC	23	488589	mir-30	hsa dre oan	HIST&NC
9	miR-30d	TGTAAACATCCCCGACTGGAAGC	23	413656	mir-30	hsa pma oan bta	HIST&NC
10	miR-103a	AGCAGCATTGTACAGGGCTATGA	23	274894	mir-103	hsa	HIST&NC
11	miR-127	TCGGATCCGTCTGAGCTTGGC	21	399720	mir-127	mmu oar	HIST&NC
12	miR-182	TTTGGCAATGGTAGAACTCACACCG	25	326627	mir-182	hsa sko lgi cte mmu eca dre	HIST&NC
13	let-7-5p	TGAGGTAGTAGGTTGTATAGT	21	220610	let-7	tca dme	HIST&NC
14	let-7g	TGAGGTAGTAGTTTGTACAGTT	22	185745	let-7	mmu gga xtr dre	HIST&NC
15	let-7b	TGAGGTAGTAGGTTGTGTGGTT	22	307685	let-7	hsa odi pma xtr cin	HIST&NC
16	miR-379	TGGTAGACTATGGAACGTAGG	21	226457	mir-379	hsa	HIST&NC
17	miR-30e	TGTAAACATCCTTGACTGGAAGC	23	133549	mir-30	gga mmu pma oan	HIST&NC
18	miR-99b	CACCCGTAGAACCGACCTTGC	21	167000	mir-99	mmu	HIST&NC
19	miR-24	TGGCTCAGTTCAGCAGGAACAGT	23	212293	mir-24	hsa cfa mdo	HIST&NC
20	miR-26a	TTCAAGTAATCCAGGATAGG	20	218341	mir-26	hsa gga	HIST&NC
21	miR-434-3p	TTTGAACCATCACTCGACTCCT	22	103955	mir-434	mmu	HIST&NC
22	miR-181a	AACATTCAACGCTGTCGGTGA	21	162097	mir-181	mmu cfa bta	HIST&NC
23	miR-30e*	CTTTCAGTCGGATGTTTACAGC	22	83983	mir-30	mmu	HIST&NC
24	miR-744	TGCGGGGCTAGGGCTAACAGC	21	65540	mir-744	mmu	HIST&NC
25	miR-124	TAAGGCACGCGGTGAATGC	19	82918	mir-124	cel aae mmu dre	HIST&NC
26	miR-128	TCACAGTGAACCGGTCTCTTT	21	103092	mir-128	mmu dre pma	HIST&NC
27	miR-30a*	CTTTCAGTCGGATGTTTGCAGC	22	73118	mir-30	hsa pma	HIST&NC
28	miR-148a	TCAGTGCACTACAGAACTTTGT	22	52850	mir-148	hsa	HIST&NC
29	miR-29a	TAGCACCATCTGAAATCGGTT	21	92517	mir-29	hsa gga cte bfl pma bta ggo	HIST&NC
30	miR-183	TATGGCACTGGTAGAATTCACT	22	125748	mir-183	lgi mmu gga sko spu	HIST&NC
31	miR-7	TGGAAGACTAGTGATTTTGTTGTT	24	67205	mir-7	egr ssc cte gga ggo	HIST&NC
32	miR-146b	TGAGAACTGAATTCCATAGGCTGT	24	66575	mir-146	rno gga ssc dre xtr	HIST&NC
33	miR-138	AGCTGGTGTTGTGAATCAGGC	21	44704	mir-138	mmu dre	HIST&NC
34	let-7e	TGAGGTAGGAGGTTGTATAGTT	22	128485	let-7	hsa xtr cin bta	HIST&NC
35	miR-101	GTACAGTACTGTGATAACTGA	21	109856	mir-101	hsa gga cfa cin	HIST&NC
36	miR-100	AACCCGTAGATCCGAACTTGT	21	63838	mir-99	hsa nve bfl mdo	HIST&NC
37	miR-30a-5p	TGTAAACATCCTCGACTGGAAGCT	24	43702	mir-30	bta	HIST&NC
38	miR-7-5p	TGGAAGACTAGTGATTTTGTTGT	23	39492	mir-7	sja tca dme	HIST&NC
39	miR-129-5p	CTTTTTGCGGTCTGGGCTTGC	21	35258	mir-129	mmu	HIST&NC
40	miR-125b-5p	TCCCTGAGACCCTAACTTGTGA	22	41916	mir-125	mmu	HIST&NC
41	miR-34c	AGGCAGTGTAGTTAGCTGATTGC	23	31889	mir-34	tgu mmu bta	HIST&NC
42	miR-411	ATAGTGGACCGTATAGCGTACG	22	82727	mir-379	ssc mmu cfa	HIST&NC
43	miR-101a	TACAGTACTGTGATAGCTGAAG	22	97447	mir-101	dre	HIST&NC
44	miR-9a	TCTTTGGTTATCTAGCTGTATGAT	24	30870	mir-9	sme	HIST&NC
45	miR-148b-3p	TCAGTGCATCACAGAACTTTGT	22	32966	mir-148	rno	HIST&NC
46	let-7d	AGAGGTAGTAGGTTGCATAGTT	22	48687	let-7	hsa odi gga dre pma cin mdo	HIST&NC
47	miR-151-3p	CTAGACTGAGGCTCCTTGAGG	21	55668	mir-28	hsa mmu ssc	HIST&NC
48	miR-219-2-3p	AGAATTGTGGCTGGACATCTGT	22	28851	mir-219	hsa	HIST&NC
49	miR-21	TAGCTTATCAGACTGATGTTGA	22	45398	mir-21	hsa dre bta	HIST&NC
50	miR-9*	ATAAAGCTAGATAACCGAAAGT	22	32176	mir-9	gga mmu dre bta	HIST&NC
51	miR-124a	TTAAGGCACGCGGTGAATGC	20	31330	mir-124	odi sme gga	HIST&NC
52	miR-191	CAACGGAATCCCAAAAGCAGCTG	23	67221	mir-191	mmu xtr	HIST&NC
53	miR-27b	TTCACAGTGGCTAAGTTCTGC	21	33551	mir-27	mmu dre	HIST&NC
54	miR-383	CAGATCAGAAGGTGACTGTGG	21	57337	mir-383	hsa rno mmu oan	HIST&NC
55	let-7i	TGAGGTAGTAGTTTGTGCTGT	21	74605	let-7	mmu ssc gga	HIST&NC
56	miR-134	TGTGACTGGTTGACCAGAGGGG	22	30411	mir-134	mmu ggo bta	HIST&NC
57	miR-126a	TCGTACCGTGAGTAATAATGC	21	23206	mir-126	dre	HIST&NC
58	miR-140	TACCACAGGGTAGAACCACGGA	22	24734	mir-140	gga mmu cfa bta	HIST&NC
59	miR-379-5p	TGGTAGACTATGGAACGTAGGT	22	33601	mir-379	oar	HIST&NC
60	miR-181b	AACATTCATTGCTGTCGGTGG	21	39576	mir-181	hsa gga ssc cfa pma	HIST&NC
61	miR-541	AAGGGATTCTGATGTTGGTCACACT	25	28185	mir-541	hsa mmu	HIST&NC
62	miR-30e-5p	TGTAAACATCCTTGACTGGAAGCT	24	16961	mir-30	bta	HIST&NC
63	miR-139-3p	TGGAGACGCGGCCCTGTTGGA	21	23312	mir-139	hsa mmu	HIST&NC
64	miR-382	GAAGTTGTTCGTGGTGGATTCG	22	18686	mir-154	hsa ppy ssc cfa	HIST&NC
65	miR-221*	ACCTGGCATACAATGTAGATTTCTGT	26	25182	mir-221	hsa rno mmu oan	HIST&NC
66	miR-7b	TGGAAGACTTGTGATTTTGTTGT	23	16287	mir-7	sme gga mmu pma dre	HIST&NC
67	miR-381	TATACAAGGGCAAGCTCTCTGT	22	12113	mir-154	hsa rno	HIST&NC
68	miR-380-5p	ATGGTTGACCATAGAACATGC	21	16139	mir-379	mmu oar	HIST&NC
69	miR-30c	TGTAAACATCCTACACTCTCAGC	23	17399	mir-30	hsa fru gga pma dre	HIST&NC
70	miR-98	TGAGGTAGTAAGTTGTATTGT	21	16512	let-7	hsa	HIST&NC
71	miR-126-3p	TCGTACCGTGAGTAATAATGCG	22	9676	mir-126	mmu	HIST&NC
72	miR-132	TAACAGTCTACAGCCATGGTCG	22	11796	mir-132	mmu cfa pma	HIST&NC
73	miR-140*	ACCACAGGGTAGAACCACGGAC	22	28626	mir-140	mmu gga dre oan	HIST&NC
74	miR-664-2*	CTGGCTGGGGAAAATGATTGGA	22	12957	mir-664	rno	HIST&NC
75	miR-1a	TGGAATGTAAAGAAGTATGTAT	22	8204	mir-1	mmu	HIST&NC
76	miR-192	CTGACCTATGAATTGACAGC	20	10731	mir-192	hsa pma bta	HIST&NC
77	miR-93	CAAAGTGCTGTTCGTGCAGGTAG	23	9494	mir-17	hsa bta ggo	HIST&NC
78	miR-9a*	TAAAGCTAGATAACCGAAAGTA	22	8214	mir-9	pma	HIST&NC
79	miR-125a	TCCCTGAGACCCTTTAACCTGT	22	12204	mir-125	cfa dre bta	HIST&NC
80	miR-99a	AACCCGTAGATCCGATCTTGT	21	11466	mir-99	hsa bta	HIST&NC
81	miR-340-5p	TTATAAAGCAATGAGACTGATT	22	14189	mir-340	rno	HIST&NC
82	miR-146b-5p	TGAGAACTGAATTCCATAGGCT	22	7810	mir-146	hsa	HIST&NC
83	miR-101b	TACAGTACTGTGATAGCTGA	20	12866	mir-101	rno dre	HIST&NC
84	miR-27a	TTCACAGTGGCTAAGTTCCGC	21	7088	mir-27	hsa dre ggo	HIST&NC
85	miR-485	AGAGGCTGGCCGTGATGAATTCG	23	8220	mir-485	cfa	HIST&NC
86	miR-16	TAGCAGCACGTAAATATTGGCG	22	9990	mir-15	hsa ppy gga pma	HIST&NC
87	miR-29b	TAGCACCATTTGAAATCAGTGTT	23	9448	mir-29	hsa ssc cte dre	HIST&NC
88	miR-200c	TAATACTGCCGGGTAATGATGGA	23	8818	mir-8	hsa rno bfl mml dre mdo	HIST&NC
89	miR-137	TTATTGCTTAAGAATACGCGTAG	23	14468	mir-137	tni gga mmu cfa dre pma	HIST&NC
90	miR-1839	AAGGTAGATAGAACAGGTCTTG	22	13170	mir-1839	cfa	HIST&NC
91	miR-3068	TTGGAGTTCATGCAAGTTCTAACC	24	6063	undef	mmu	HIST&NC
92	miR-151-5p	TCGAGGAGCTCACAGTCTAGT	21	7818	mir-28	mmu	HIST&NC
93	miR-872	AAGGTTACTTGTTAGTTCAGG	21	6552	mir-872	mmu	HIST&NC
94	miR-206	TGGAATGTAAGGAAGTGTGTGG	22	6216	mir-1	mmu ssc mdo	HIST&NC
95	miR-378c	ACTGGACTTGGAGTCAGAAGGT	22	16509	undef	hsa	HIST&NC
96	miR-26b	TTCAAGTAATTCAGGATAGGTT	22	9366	mir-26	hsa dre bta	HIST&NC
97	miR-434*	AGCTCGACTCATGGTTTGAACC	22	5947	mir-434	rno	HIST&NC
98	miR-16b	TAGCAGCACGTAAATATTGGC	21	4304	mir-15	xtr dre bta	HIST&NC
99	miR-423-5p	TGAGGGGCAGAGAGCGAGACTTT	23	5529	mir-423	hsa	HIST&NC
100	miR-1224-5p	GTGAGGACTGGGGAGGTGGAGGG	23	11756	mir-1224	hsa ptr	HIST&NC
101	miR-139	TCTACAGTGCACGTGTCTCCAGT	23	7316	mir-139	tgu cfa oan bta	HIST&NC
102	miR-30b-3p	CTTTCAGTCGGATGTTTGCAG	21	6549	mir-30	tgu	HIST&NC
103	miR-30c-2*	CTGGGAGAAGGCTGTTTACTCT	22	6324	mir-30	hsa	HIST&NC
104	miR-125a-5p	TCCCTGAGACCCTTTAACCTGTGA	24	4902	mir-125	mmu	HIST&NC
105	miR-1c	TGGAATGTAAAGAAGTATGTAC	22	4055	mir-1	odi pma	HIST&NC
106	miR-1	TGGAATGTAAAGAAGTATGT	20	6491	mir-1	cel crm rno cte sko	HIST&NC
107	miR-184	TGGACGGAGAACTGATAAGGGT	22	5626	mir-184	bmo mmu aga	HIST&NC
108	miR-22	AAGCTGCCAGTTGAAGAACTGT	22	3921	mir-22	hsa mdo	HIST&NC
109	miR-422a	ACTGGACTTGGGGTCAGAAGGC	22	5956	mir-422	hsa ppy mml	HIST&NC
110	miR-23b	ATCACATTGCCAGGGATTACCACT	24	11235	mir-23	ptr mmu cfa dre oan	HIST&NC
111	miR-152	TCAGTGCATGACAGAACTTGG	21	5339	mir-148	fru mmu dre mdo	HIST&NC
112	miR-195	TAGCAGCACAGAAATATTGGCA	22	6722	mir-15	mmu bta mdo	HIST&NC
113	miR-320a	AAAAGCTGGGTTGAGAGGGCGA	22	3972	mir-320	hsa	HIST&NC
114	miR-127*	CTGAAGCTCAGAGGGCTCTGA	21	7311	mir-127	rno mmu	HIST&NC
115	miR-30b	TGTAAACATCCTACACTCAGCT	22	4798	mir-30	mmu mml pma	HIST&NC
116	miR-218a	TTGTGCTTGATCTAACCATGTGG	23	9893	mir-218	dre	HIST&NC
117	miR-185	TGGAGAGAAAGGCAGTTCCTGA	22	5935	mir-185	mmu	HIST&NC
118	miR-598	TACGTCATCGTCGTCATCGTTATC	24	9810	mir-598	hsa mmu	HIST&NC
119	miR-218	TTGTGCTTGATCTAACCATGT	21	3292	mir-218	hsa	HIST&NC
120	miR-338*	AACAATATCCTGGTGCTGAGT	21	3934	mir-338	rno	HIST&NC
121	miR-153	TTGCATAGTCACAAAAGTGATC	22	4397	mir-153	dpu mmu gga sko pma cin	HIST&NC
122	miR-136*	CATCATCGTCTCAAATGAGTCT	22	4532	mir-136	hsa mmu	HIST&NC
123	miR-135a	TATGGCTTTTTATTCCTATGTGA	23	3161	mir-135	mmu	HIST&NC
124	miR-92b	TATTGCACTCGTCCCGGCCTCC	22	4100	mir-25	sko bfl xtr oan dre	HIST&NC
125	miR-330	TCTCTGGGCCTGTGTCTTAGGA	22	8293	mir-330	rno	HIST&NC
126	miR-149	TCTGGCTCCGTGTCTTCACTCCC	23	4049	mir-149	mmu	HIST&NC
127	miR-1224	GTGAGGACTGGGGAGGTGGAGG	22	10193	mir-1224	mmu bta	HIST&NC
128	miR-1957	CAGTCGGTAGAGCATCAGA	19	4474	undef	mmu	HIST&NC
129	miR-582*	AACCTGTTGAACAACTGAACCC	22	3706	mir-582	rno	HIST&NC
130	miR-181d	AACATTCATTGTTGTCGGTGGG	22	6659	mir-181	hsa	HIST&NC
131	miR-328a	CTGGCCCTCTCTGCCCTTCCGT	22	4479	mir-328	rno	HIST&NC
132	miR-186	CAAAGAATTCTCCTTTTGGGCTT	23	7444	mir-186	mmu ssc	HIST&NC
133	miR-200b	TAATACTGCCTGGTAATGATGA	22	5388	mir-8	rno gga mmu bfl pma bta	HIST&NC
134	miR-330*	CAAAGCACAGGGCCTGCAGAGA	22	11169	mir-330	rno	HIST&NC
135	miR-23a	ATCACATTGCCAGGGATTTCC	21	6494	mir-23	hsa cfa pma dre mdo	HIST&NC
136	miR-4206-3p	ATTGGATGGTTTAGTGAGGC	20	2354	undef	cin	HIST&NC
137	miR-1843-3p	TCTGATCGTTCACCTCCATACA	22	3874	mir-1843	mmu	HIST&NC
138	miR-434-5p	GCTCGACTCATGGTTTGAACC	21	2932	mir-434	mmu	HIST&NC
139	miR-4006b-5p	TTGGAACAATGTAGGTAAGGG	21	5118	undef	cin	HIST&NC
140	miR-126*	CATTATTACTTTTGGTACGC	20	2148	mir-126	tgu	HIST&NC
141	miR-25	CATTGCACTTGTCTCGGTCTGA	22	2382	mir-25	hsa ptr	HIST&NC
142	miR-126	TCGTACCGTGAGTAATAATGCGA	23	4150	mir-126	gga pma cin bta	HIST&NC
143	miR-532-5p	CATGCCTTGAGTGTAGGACTGT	22	2010	mir-188	hsa rno	HIST&NC
144	miR-1843-5p	TATGGAGGTCTCTGTCTGACT	21	5710	mir-1843	mmu	HIST&NC
145	miR-338	TCCAGCATCAGTGATTTTGTTGA	23	2238	mir-338	rno	HIST&NC
146	miR-125b*	ACAAGTCAGGCTCTTGGGACC	21	3368	mir-125	rno sme	HIST&NC
147	miR-221	AGCTACATTGTCTGCTGGGTTT	22	6170	mir-221	hsa pma bta	HIST&NC
148	miR-384-5p	TGTAAACAATTCCTAGGCAATGT	23	2351	mir-384	mmu	HIST&NC
149	miR-129	CTTTTTGCGGTCTGGGCTTGCA	22	2816	mir-129	dre	HIST&NC
150	miR-770-3p	GTGGGCCTGACGTGGAGCTGG	21	3374	mir-770	mmu	HIST&NC
151	miR-369-3p	AATAATACATGGTTGATCTTT	21	2243	mir-154	hsa	HIST&NC
152	miR-128-2*	GGGGGCCGATGCACTGTAAGAGA	23	4325	mir-128	rno mmu	HIST&NC
153	miR-423*	TGAGGGGCAGAGAGCGAGACTTTT	24	2321	mir-423	rno	HIST&NC
154	miR-341	TCGGTCGATCGGTCGGTCGGT	21	3600	mir-341	rno	HIST&NC
155	miR-146a	TGAGAACTGAATTCCATGGGTT	22	4523	mir-146	mmu dre bta	HIST&NC
156	miR-410	AATATAACACAGATGGCCTGT	21	2034	mir-154	mmu	HIST&NC
157	miR-485-5p	AGAGGCTGGCCGTGATGAATTC	22	3741	mir-485	hsa	HIST&NC
158	miR-219-3p	AGAATTGTGGCTGGACATCTG	21	4220	mir-219	bta	HIST&NC
159	miR-300	TATGCAAGGGCAAGCTCTCTTC	22	2122	mir-154	mmu	HIST&NC
160	miR-204	TTCCCTTTGTCATCCTATGCCT	22	2168	mir-204	mmu	HIST&NC
161	miR-181a*	ACCATCGACCGTTGATTGTACC	22	2310	mir-181	hsa pma	HIST&NC
162	miR-181c	AACATTCAACCTGTCGGTGAGT	22	2933	mir-181	hsa cfa dre oan bta	HIST&NC
163	miR-1298	TTCATTCGGCTGTCCAGATGTA	22	2322	mir-1298	hsa	HIST&NC
164	miR-200a	TAACACTGTCTGGTAACGATGTT	23	3372	mir-8	mmu bfl bta	HIST&NC
165	miR-150	TCTCCCAACCCTTGTACCAGTG	22	2128	mir-150	mmu xtr dre bta	HIST&NC
166	miR-361-5p	TTATCAGAATCTCCAGGGGTAC	22	1864	mir-361	hsa	HIST&NC
167	miR-380*	TATGTAGTATGGTCCACATCT	21	1267	mir-379	hsa rno	HIST&NC
168	miR-664*	GCTGGCTGGGGAAAATGATTGGA	23	2383	mir-664	hsa mmu	HIST&NC
169	miR-136	ACTCCATTTGTTTTGATGATGG	22	2178	mir-136	hsa mmu	HIST&NC
170	miR-92a	TATTGCACTTGTCCCGGCCTGT	22	2550	mir-25	hsa odi sko mmu aga xbo pma spu	HIST&NC
171	miR-384-3p	ATTCCTAGAAATTGTTCACAAT	22	1498	mir-384	mmu	HIST&NC
172	miR-212-5p	ACCTTGGCTCTAGACTGCTTACT	23	1225	mir-132	mmu	HIST&NC
173	miR-212	TAACAGTCTCCAGTCACGGC	20	2143	mir-132	hsa mml	HIST&NC
174	miR-542-3p	TGTGACAGATTGATAACTGA	20	2573	mir-542	mmu	HIST&NC
175	miR-376b*	GTGGATATTCCTTCTATGGTT	21	2359	mir-368	mmu	HIST&NC
176	miR-338-3p	TCCAGCATCAGTGATTTTGTTG	22	2143	mir-338	mmu	HIST&NC
177	let-7d*	CTATACGACCTGCTGCCTTTCT	22	1525	let-7	hsa oan	HIST&NC
178	miR-29c	TAGCACCATTTGAAATCGG	19	2766	mir-29	mmu gga	HIST&NC
179	miR-125-2*	ACGGGTTAGGCTCTTGGGAGC	21	1961	mir-125	tgu	HIST&NC
180	miR-429	TAATACTGTCTGGTAATGCCGT	22	2740	mir-8	hsa mmu mdo xla	HIST&NC
181	miR-488	TTGAAAGGCTGTTTCTTGGTC	21	4398	mir-488	hsa mmu	HIST&NC
182	miR-125b-1*	ACGGGTTAGGCTCTTGGGAGT	21	1422	mir-125	hsa	HIST&NC
183	miR-139-5p	TCTACAGTGCACGTGTCTCCAG	22	1587	mir-139	hsa	HIST&NC
184	miR-126-5p	CATTATTACTTTTGGTACGCG	21	1491	mir-126	mmu	HIST&NC
185	miR-1298*	CATCTGGGCAACTGATTGAACT	22	1909	mir-1298	mmu	HIST&NC
186	miR-148b*	GAAGTTCTGTTATACACTCAGGC	23	1057	mir-148	hsa mmu	HIST&NC
187	miR-760-3p	TCGGCTCTGGGTCTGTGGGGA	21	4672	mir-760	mmu	HIST&NC
188	miR-3559-5p	TGACAGACTTAGTACTACATGA	22	1039	undef	rno	HIST&NC
189	miR-708	AAGGAGCTTACAATCTAGCTGGG	23	1829	mir-708	mmu	HIST&NC
190	miR-130a	CAGTGCAATGTTAAAAGGGC	20	2151	mir-130	mmu gga mml	HIST&NC
191	miR-212-3p	TAACAGTCTCCAGTCACGGCCA	22	2254	mir-132	mmu	HIST&NC
192	miR-129-3p	AAGCCCTTACCCCAAAAAGCAT	22	1857	mir-129	hsa	HIST&NC
193	miR-409-3p	GAATGTTGCTCGGTGAACCCCT	22	1814	mir-154	rno mmu oar	HIST&NC
194	miR-672	TGAGGTTGGTGTACTGTGTGTGA	23	911	mir-672	mmu	HIST&NC
195	miR-325-3p	TTTATTGAGCACCTCCTATCA	21	1223	mir-325	rno	HIST&NC
196	miR-369-5p	AGATCGACCGTGTTATATTCGC	22	895	mir-154	hsa eca oar bta	HIST&NC
197	miR-3099	TAGGCTAGAAAGAGGTTGGGGA	22	3760	undef	mmu	HIST&NC
198	miR-378b	CTGGACTTGGAGTCAGAAGGA	21	1070	undef	hsa mmu	HIST&NC
199	miR-20a	TAAAGTGCTTATAGTGCAGGTAG	23	779	mir-17	hsa oan pma	HIST&NC
200	miR-320	AAAAGCTGGGTTGAGAGGGCGAA	23	3638	mir-320	ssc xtr	HIST&NC
201	miR-433	ATCATGATGGGCTCCTCGGTGT	22	2299	mir-433	mmu	HIST&NC
202	miR-708*	CAACTAGACTGTGAGCTTCT	20	1574	mir-708	mmu	HIST&NC
203	miR-2779	TCGTTTCCGGCTCGAAGGACCA	22	2066	undef	bmo	HIST&NC
204	miR-24b	TGGCTCAGTTCAGCAGGAA	19	1534	mir-24	xtr	HIST&NC
205	miR-879	AGAGGCTTATAGCTCTAAGC	20	758	mir-879	mmu	HIST&NC
206	miR-496	AGTATTACATGGCCAATCTCC	21	735	mir-154	hsa rno	HIST&NC
207	miR-344	TGATCTAGCCAAAGCCTGACTGT	23	738	mir-344	mmu	HIST&NC
208	miR-448	TTGCATATGTAGGATGTCCCA	21	1754	mir-448	hsa rno	HIST&NC
209	miR-375	TTTGTTCGTTCGGCTCGCGTGA	22	852	mir-375	hsa sko spu mdo	HIST&NC
210	miR-342	TCTCACACAGAAATCGCACCCGTC	24	802	mir-342	ssc bta	HIST&NC
211	miR-2478	TCGTATCCCACTTCTGACACCA	22	2523	undef	bta	HIST&NC
212	miR-486-5p	TCCTGTACTGAGCTGCCCCGAG	22	1596	mir-486	hsa	HIST&NC
213	miR-17	CAAAGTGCTTACAGTGCAGGTAG	23	600	mir-17	hsa	HIST&NC
214	miR-15a	TAGCAGCACATAATGGTTTGTGGA	24	1085	mir-15	hsa gga pma	HIST&NC
215	miR-652	AATGGCGCCACTAGGGTTGTG	21	1292	mir-652	hsa cfa	HIST&NC
216	miR-323	CACATTACACGGTCGACCTCT	21	1281	mir-154	rno ssc	HIST&NC
217	miR-411a-3p	TATGTAACACGGTCCACTAAC	21	574	mir-379	oar	HIST&NC
218	miR-138b	AGCTGGTGTTGTGAATCAGGCCGA	24	2550	mir-138	cfa pma	HIST&NC
219	miR-96	TTTGGCACTAGCACATTTTTGCT	23	1012	mir-96	hsa isc sko mml	HIST&NC
220	miR-335	TCAAGAGCAATAACGAAAAATG	22	1477	mir-335	rno ssc	HIST&NC
221	miR-326	CCTCTGGGCCCTTCCTCCAGT	21	881	mir-326	hsa mmu eca	HIST&NC
222	miR-3968	TCGAATCCCACTTCTGACACCA	22	1186	undef	mmu	HIST&NC
223	miR-222	AGCTACATCTGGCTACTGGG	20	3476	mir-221	hsa gga	HIST&NC
224	miR-106b	TAAAGTGCTGACAGTGCAGATA	22	1134	mir-17	mmu	HIST&NC
225	miR-3535	TGGATATGATGACTGATTACCTGAGA	26	949	undef	gga	HIST&NC
226	miR-337*	CGGCGTCATGCAGGAGTTGATT	22	1506	mir-337	rno	HIST&NC
227	miR-582-3p	TAACCTGTTGAACAACTGAACC	22	780	mir-582	hsa mmu eca	HIST&NC
228	miR-132*	ACCGTGGCTTTCGATTGTTACT	22	999	mir-132	hsa mmu	HIST&NC
229	miR-487b	AATCGTACAGGGTCATCCACTT	22	943	mir-154	hsa	HIST&NC
230	miR-667*	CGGTGCTGGTGGAGCAGTGAGCACG	25	843	mir-667	rno mmu	HIST&NC
231	miR-423-3p	AGCTCGGTCTGAGGCCCCTCAGT	23	1174	mir-423	hsa bta	HIST&NC
232	miR-141	TAACACTGTCTGGTAAAGATGGC	23	1094	mir-8	mmu mml dre mdo	HIST&NC
233	miR-10a	TACCCTGTAGATCCGAATTTGT	22	799	mir-10	hsa ppy dre	HIST&NC
234	miR-9b	TCTTTGGTTACCTAGCTGTATGA	23	806	mir-9	aae sme pma xtr	HIST&NC
235	miR-33	GTGCATTGTAGTTGCATTGC	20	493	mir-33	gga dpu bfl	HIST&NC
236	miR-203	GTGAAATGTTTAGGACCACTAG	22	1938	mir-203	gga mmu	HIST&NC
237	miR-370	GCCTGCTGGGGTGGAACCTGGT	22	670	mir-370	hsa	HIST&NC
238	miR-495	AAACAAACATGGTGCACTTCTT	22	916	mir-329	hsa	HIST&NC
239	miR-125b-2*	ACAAGTCAGGCTCTTGGGAC	20	1443	mir-125	hsa	HIST&NC
240	miR-493*	TTGTACATGGTAGGCTTTCATT	22	521	mir-493	hsa	HIST&NC
241	miR-335*	TTTTTCATTATTGCTCCTGACC	22	630	mir-335	hsa	HIST&NC
242	miR-148a*	AAAGTTCTGAGACACTCTGACT	22	657	mir-148	hsa	HIST&NC
243	miR-376b	ATCATGGAGGAACATCCACTT	21	1069	mir-368	hsa mmu ssc	HIST&NC
244	miR-190	TGATATGTTTGATATATTAGG	21	821	mir-190	bmo mmu bfl	HIST&NC
245	miR-145	GTCCAGTTTTCCCAGGAATCCCT	23	834	mir-145	ssc mmu oan dre	HIST&NC
246	miR-107	AGCAGCATTGTACAGGGCTAT	21	1429	mir-103	hsa cfa bta	HIST&NC
247	miR-664	TATTCATTTACTCCCCAGCCTAC	23	1355	mir-664	hsa rno eca cfa mml	HIST&NC
248	miR-322	CAGCAGCAATTCATGTTTTGGA	22	634	mir-322	rno	HIST&NC
249	miR-4497	CTCCGGGACGGCTGGGAAGGC	21	631	undef	hsa	HIST&NC
250	miR-299*	TATGTGGGACGGTAAACCGC	20	823	mir-299	rno mmu	HIST&NC
251	miR-181d-5p	AACATTCATTGTTGTCGGTGGGTT	24	619	mir-181	ssc	HIST&NC
252	miR-10b	TACCCTGTAGAACCGAATTTGT	22	501	mir-10	rno mmu gga bfl mdo	HIST&NC
253	miR-431*	TGCAGGTCGTCTTGCAGGGCTTC	23	1244	mir-431	mmu	HIST&NC
254	miR-2487	TAAGGGCTGGGTCGGTCGG	19	4384	undef	bta	HIST&NC
255	miR-28-3p	CACTAGATTGTGAGCTCCTGGA	22	778	mir-28	hsa	HIST&NC
256	miR-30b*	CTGGGATGTGGATGTTTACGTC	22	759	mir-30	hsa mmu	HIST&NC
257	miR-344b-1-3p	GATATAACCAAAGCCCGACTGT	22	436	mir-344	rno	HIST&NC
258	miR-135b	TATGGCTTTTCATTCCTATGTGA	23	576	mir-135	fru rno pma mdo	HIST&NC
259	miR-379*	TATGTAACATGGTCCACTAAC	21	376	mir-379	hsa rno	HIST&NC
260	miR-187	TCGTGTCTTGTGTTGCAGCCGG	22	998	mir-187	gga mmu xtr ggo	HIST&NC
261	miR-543	AAACATTCGCGGTGCACTTCTT	22	323	mir-329	mmu	HIST&NC
262	miR-219-5p	TGATTGTCCAAACGCAATTCTTG	23	519	mir-219	hsa dme	HIST&NC
263	miR-409-5p	AGGTTACCCGAGCAACTTTGC	21	502	mir-154	mmu	HIST&NC
264	miR-342-3p	TCTCACACAGAAATCGCACCCGT	23	354	mir-342	rno	HIST&NC
265	miR-28-5p	AAGGAGCTCACAGTCTATTGAG	22	662	mir-28	hsa ssc	HIST&NC
266	miR-708-3p	AACTAGACTGTGAGCTTCTAGA	22	780	mir-708	ssc	HIST&NC
267	miR-22-3p	AAGCTGCCAGTTGAAGAAC	19	426	mir-22	bta	HIST&NC
268	miR-124*	CGTGTTCACAGCGGACCTTGA	21	428	mir-124	tgu mmu	HIST&NC
269	miR-539*	CATACAAGGGTAATTTCTTTT	21	722	mir-154	rno	HIST&NC
270	miR-671-5p	AGGAAGCCCTGGAGGGGCTGGAGG	24	529	mir-671	hsa	HIST&NC
271	miR-1285	CTGGGCAACATAGCGAGACCCCGTCTCTA	29	1198	mir-1285	hsa ssc	HIST&NC
272	miR-31	AGGCAAGATGCTGGCATAGCTG	22	479	mir-31	hsa mmu gga cfa oan	HIST&NC
273	miR-139*	TGGAGACGCGGCCCTGTTGGAAT	23	400	mir-139	tgu	HIST&NC
274	miR-384	TCATTCCTAGAAATTGTTCACA	22	603	mir-384	hsa eca	HIST&NC
275	miR-3068*	GTGAATTGCAGTACTCCAACA	21	1321	undef	mmu	HIST&NC
276	miR-92b*	AGGGACGGGACGCGGTGCAGTGTT	24	773	mir-25	hsa rno	HIST&NC
277	miR-425	AATGACACGATCACTCCCGTTGA	23	695	mir-425	mmu	HIST&NC
278	miR-84a	AGAGGTGTAGAATAAGTG	18	269	mir-84	ppc	HIST&NC
279	miR-374	ATATAATACAACCTGCTAAGTG	22	559	mir-374	rno	HIST&NC
280	miR-504	GACCCTGGTCTGCACTCTGTC	21	410	mir-504	hsa ssc bta	HIST&NC
281	miR-329	AACACACCCAGCTAACCTTTTT	22	541	mir-329	rno	HIST&NC
282	miR-27a-3p	TTCACAGTGGCTAAGTTCCG	20	373	mir-27	bta	HIST&NC
283	miR-154	TAGGTTATCCGTGTTGCCTTCG	22	288	mir-154	mmu	HIST&NC
284	miR-22*	AGTTCTTCAGTGGCAAGCTTT	21	539	mir-22	hsa xtr	HIST&NC
285	let-7a-1*	CTATACAATCTACTGTCTTTCT	22	414	let-7	mmu	HIST&NC
286	miR-99b*	CAAGCTCGTGTCTGTGGGTCCG	22	636	mir-99	mmu	HIST&NC
287	miR-144*	GGATATCATCATATACTGTAAGT	23	580	mir-144	hsa mmu	HIST&NC
288	miR-4938	ATCATCATCATCATTATCATC	21	229	undef	cel	HIST&NC
289	miR-24-2*	GTGCCTACTGAGCTGAAACAGT	22	331	mir-24	mmu	HIST&NC
290	miR-376a	ATCGTAGAGGAAAATCCACGT	21	540	mir-368	mmu	HIST&NC
291	miR-340-3p	TCCGTCTCAGTTACTTTATAGC	22	521	mir-340	rno mmu	HIST&NC
292	miR-15b	TAGCAGCACATCATGGTTTACA	22	346	mir-15	mmu cfa	HIST&NC
293	miR-181b-1*	CTCACTGAACAATGAATGC	19	285	mir-181	rno mmu	HIST&NC
[truncated: 1,399 more rows]
